# Supplementary material for: Identifying Serum Metabolomic Markers Associated with Skin Disease Activity in Patients with Psoriatic Arthritis
Source: MDPI journal article supplement (doi:10.3390/ijms242015299), 2023-10-18
Supplement: s1 [file s1]

## Supplementary Information

### Identifying Serum Metabolomic Markers Associated with Psoriasis Skin Disease Activity in patients with Psoriatic Arthritis

Hani Choksi <sup>1,2,†</sup>, Shenghan Li <sup>1,2,‡</sup>, Nikita Looby <sup>1</sup>, Max Kotlyar <sup>3</sup>, Igor Jurisica <sup>3,4,5</sup>,  
Vathany Kulasingam <sup>2,6,\*</sup> and Vinod Chandran <sup>1,2,7,\*</sup>

#### Affiliations:

<sup>1</sup> Schroeder Arthritis Program, Krembil Research Institute, University Health Network, Toronto, ON M5T 0S8, Canada; hani.choksi@utoronto.ca (H.C.); shanhan.li@mail.utoronto.ca (S.L.); nikita.looby@uhn.ca (N.L.)

<sup>2</sup> Department of Laboratory Medicine and Pathobiology, University of Toronto, Toronto, ON M5S 1A1, Canada

<sup>3</sup> Osteoarthritis Research Program, Division of Orthopedic Surgery, Schroeder Arthritis Institute and Data Science Discovery Centre for Chronic Diseases, Krembil Research Institute, Toronto, ON M5T 0S8, Canada; max.kotlyar@uhn.ca (M.K.); juris@ai.utoronto.ca (I.J.)

<sup>4</sup> Departments of Medical Biophysics and Computer Science, and Faculty of Dentistry, University of Toronto, Toronto, ON M5S 1A1, Canada

<sup>5</sup> Institute of Neuroimmunology, Slovak Academy of Sciences, Dubravská cesta 9, 845 10 Bratislava 45, Slovakia

<sup>6</sup> Division of Clinical Biochemistry, Laboratory Medicine Program, University Health Network, Toronto, ON M5T 0S8, Canada

<sup>7</sup> Division of Rheumatology, Department of Medicine, University of Toronto, Toronto, ON M5S 1A8, Canada

\* Correspondence: vathany.kulasingam@uhn.ca (V.K.); vinod.chandran@uhn.ca (V.C.);

Tel.: +1-4163404800 (ext. 8589) (V.K.); +1-4166035192 (V.C.)

† These authors contributed equally to this work.

‡ These authors contributed equally to this work.

Table S1: Peaks of summarized positive mode features

| Feature Peak                                                                         | m/z      |
|--------------------------------------------------------------------------------------|----------|
| 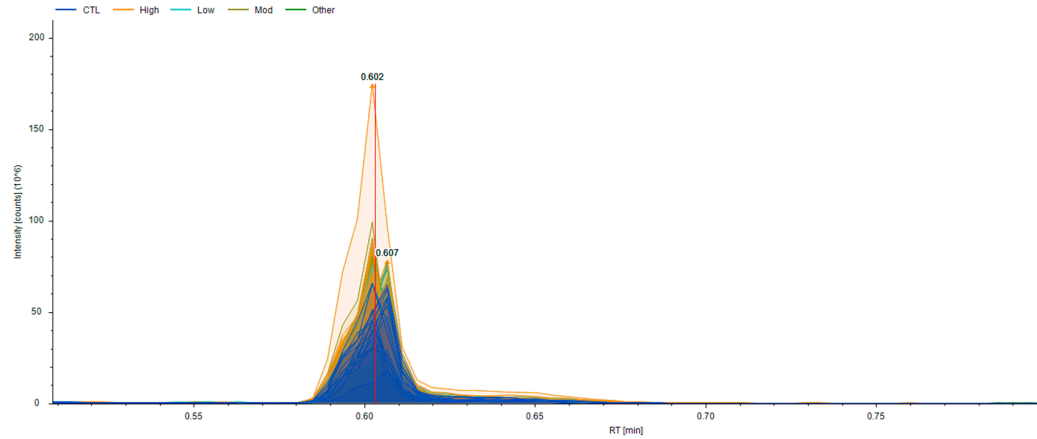   | 116.0708 |
|   | 188.0707 |
|  | 211.1441 |

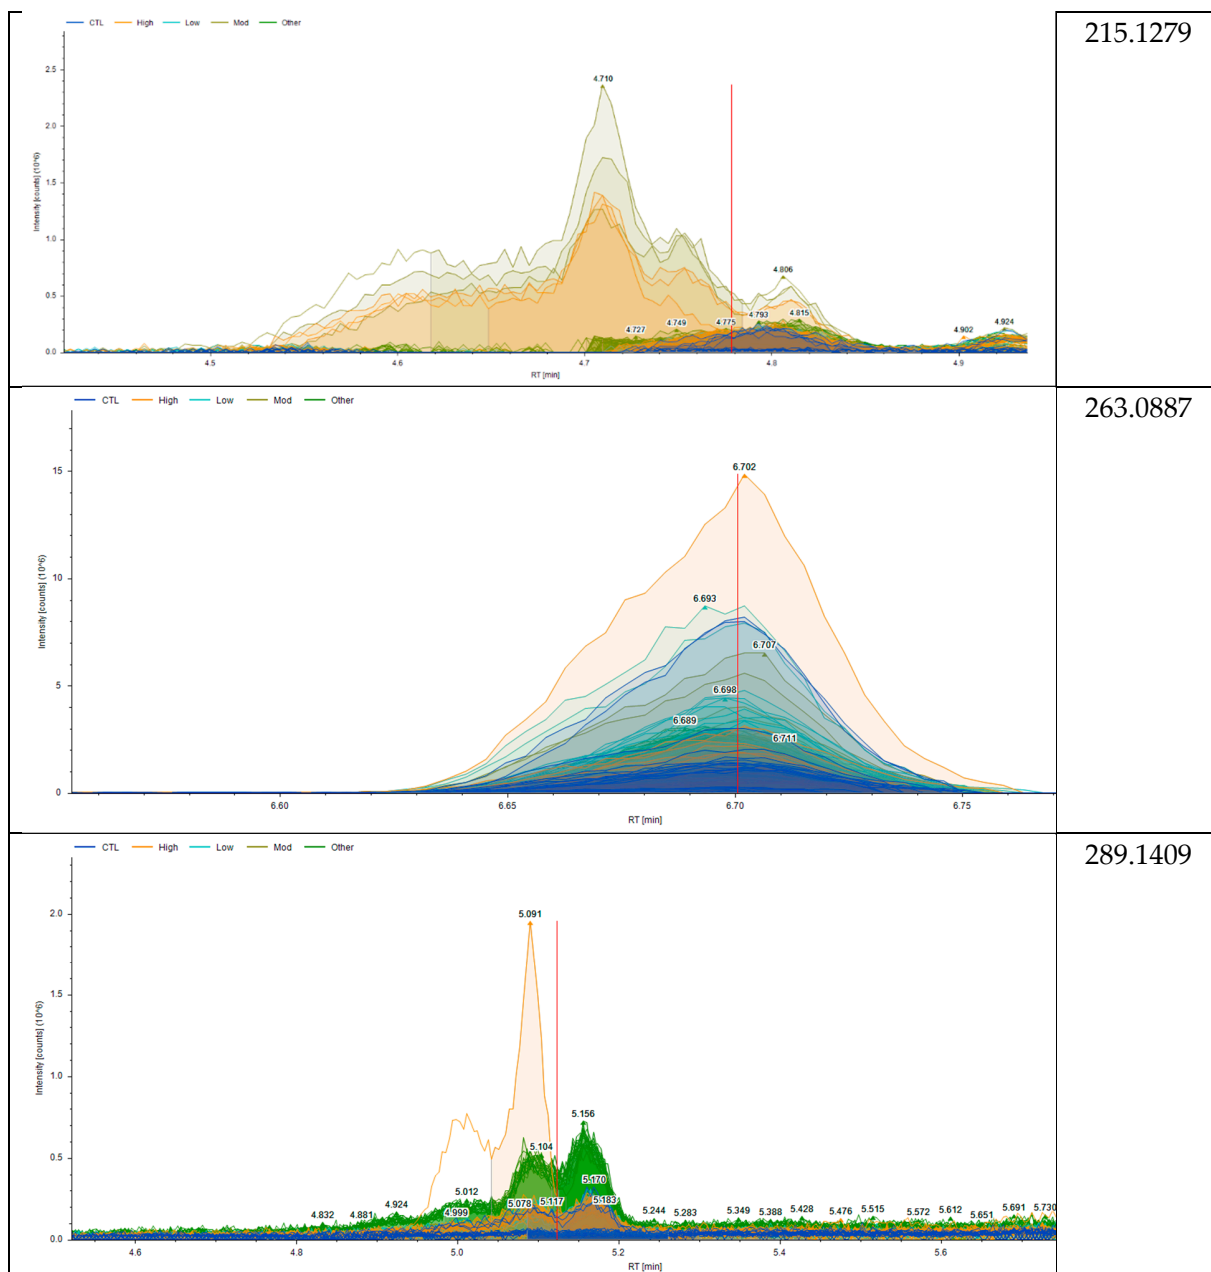

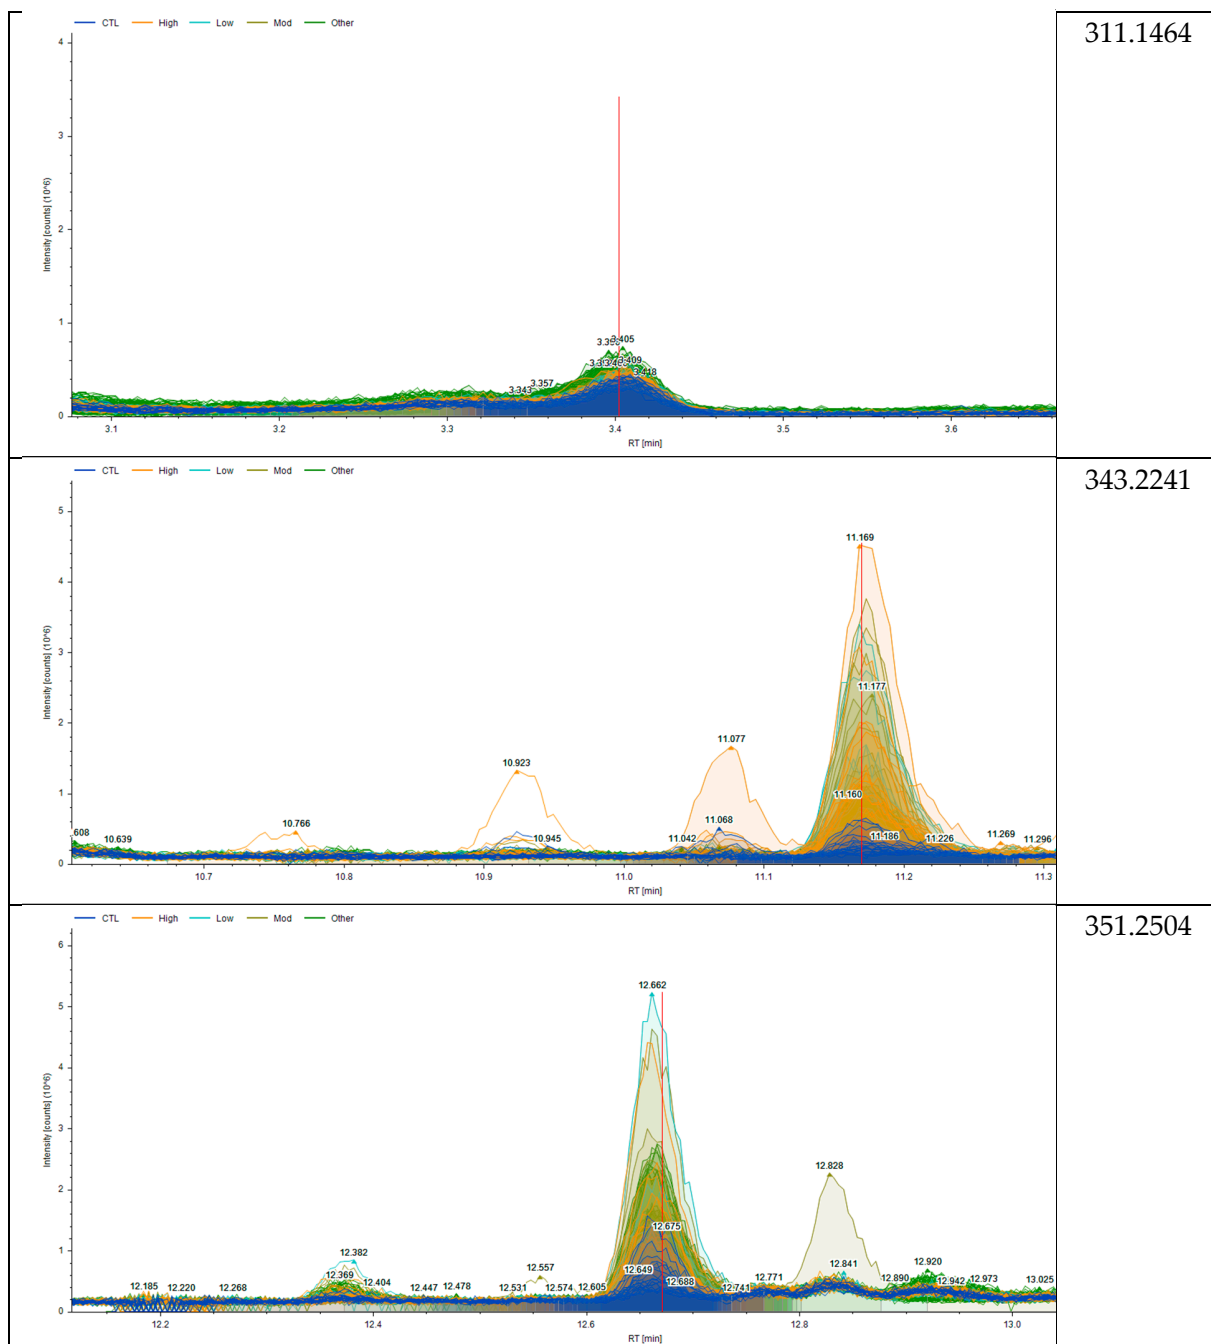



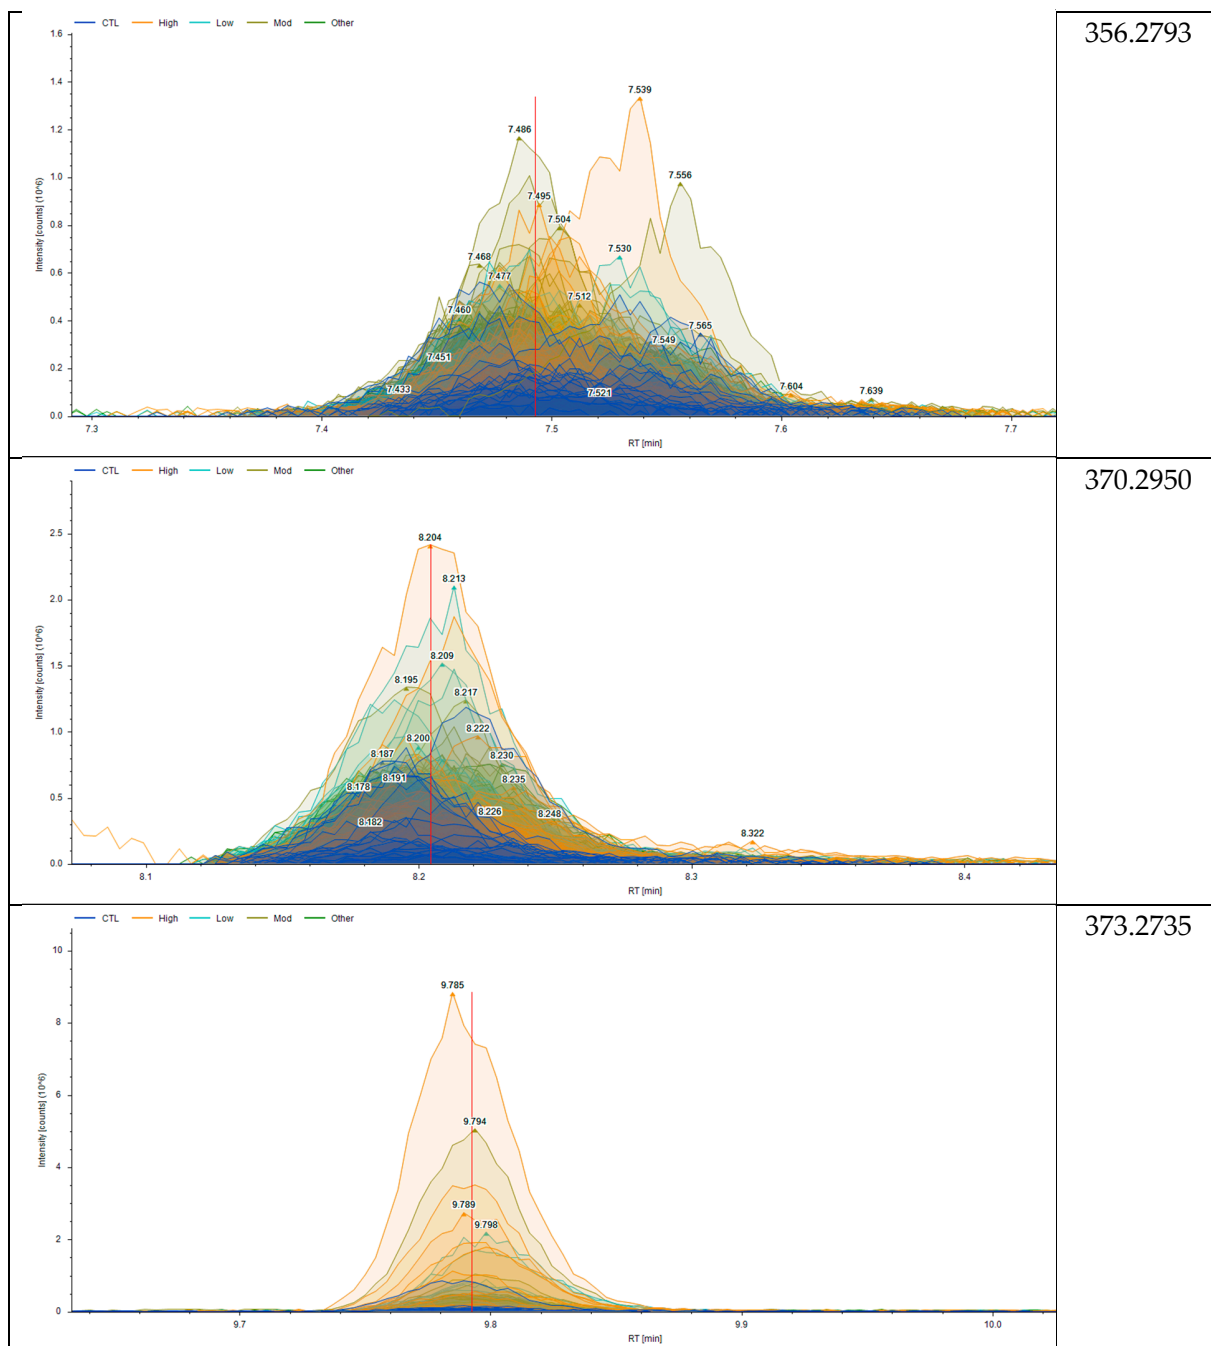

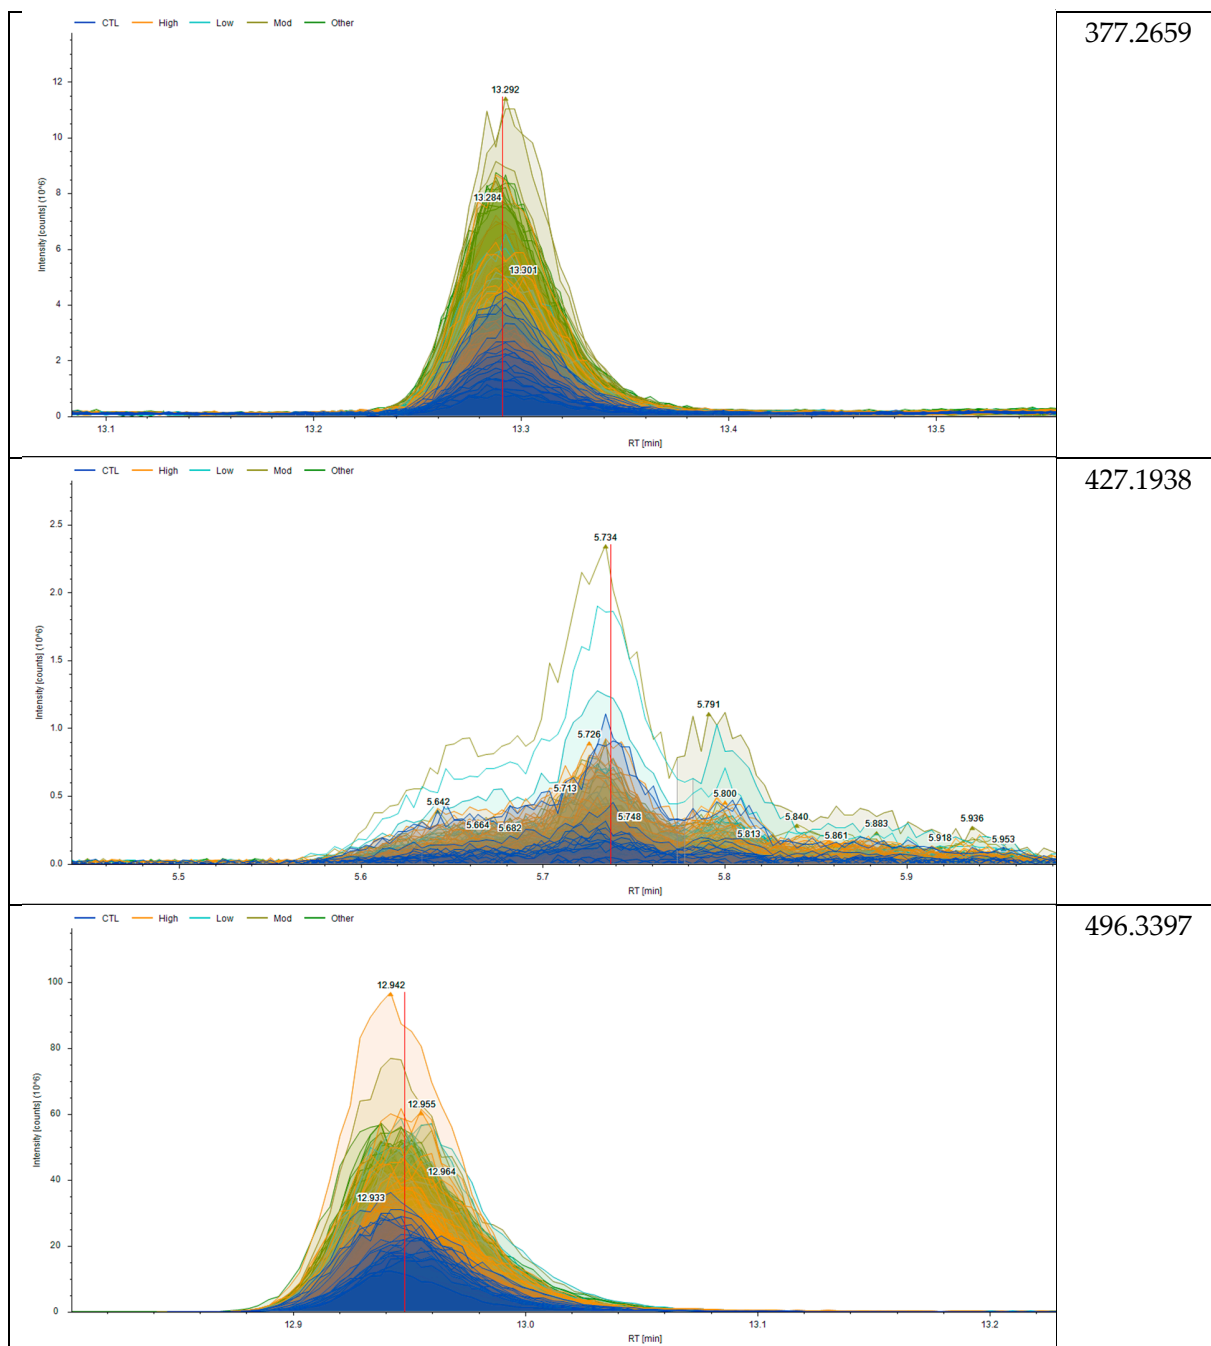

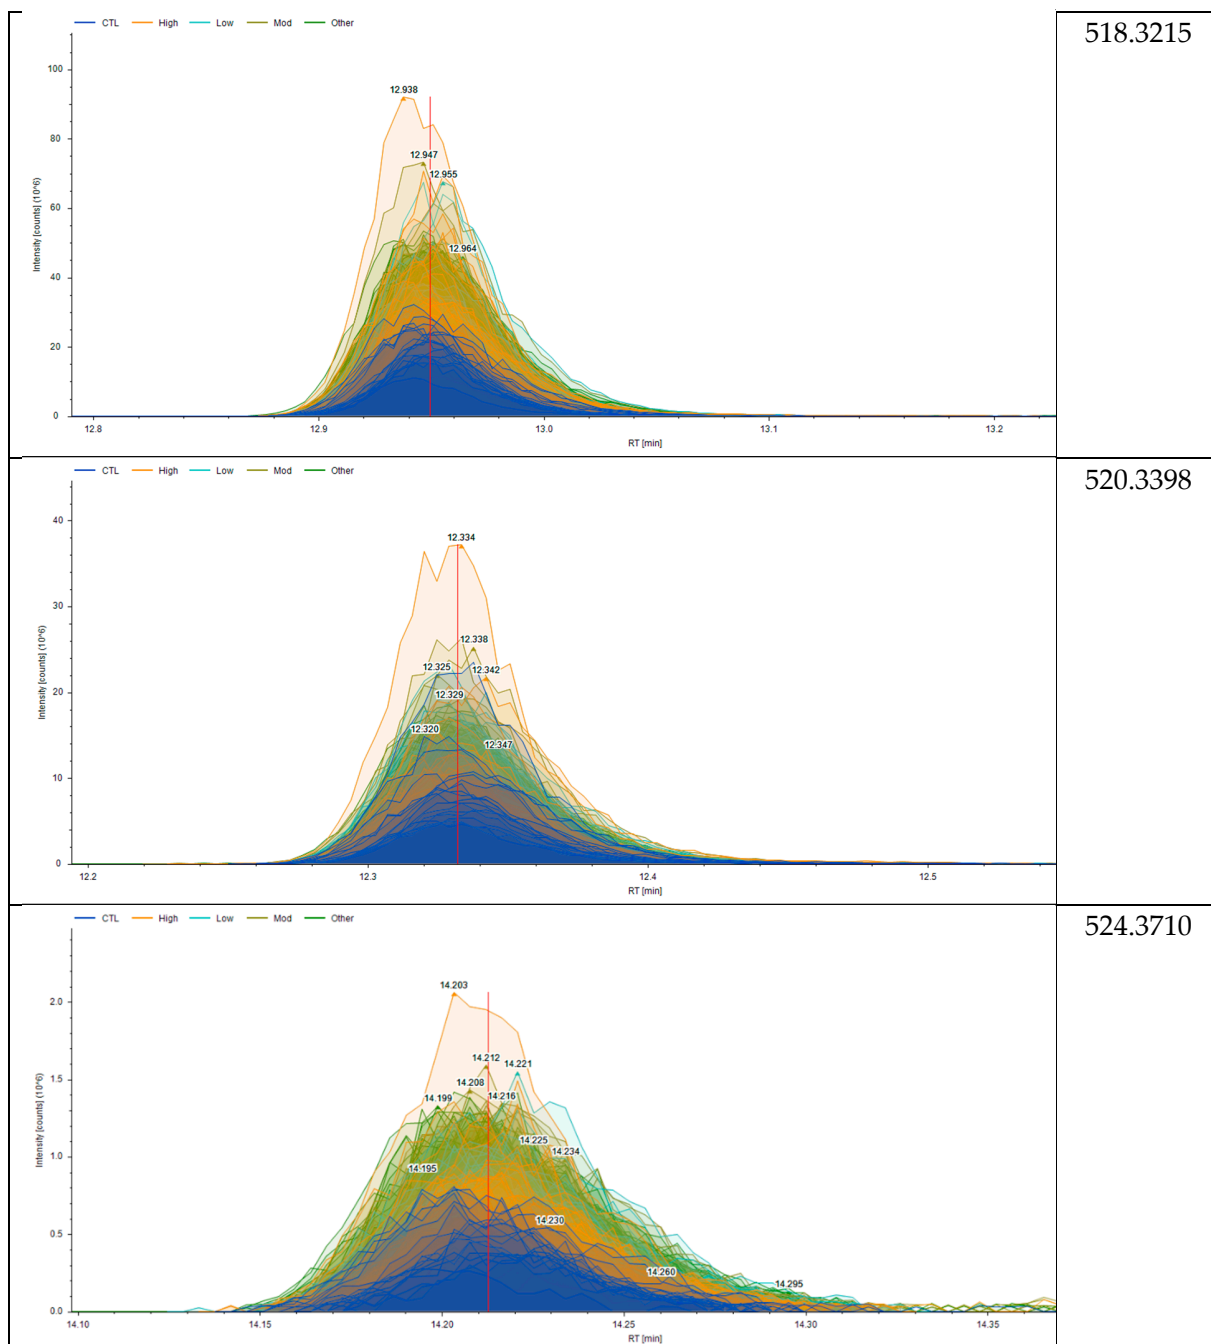

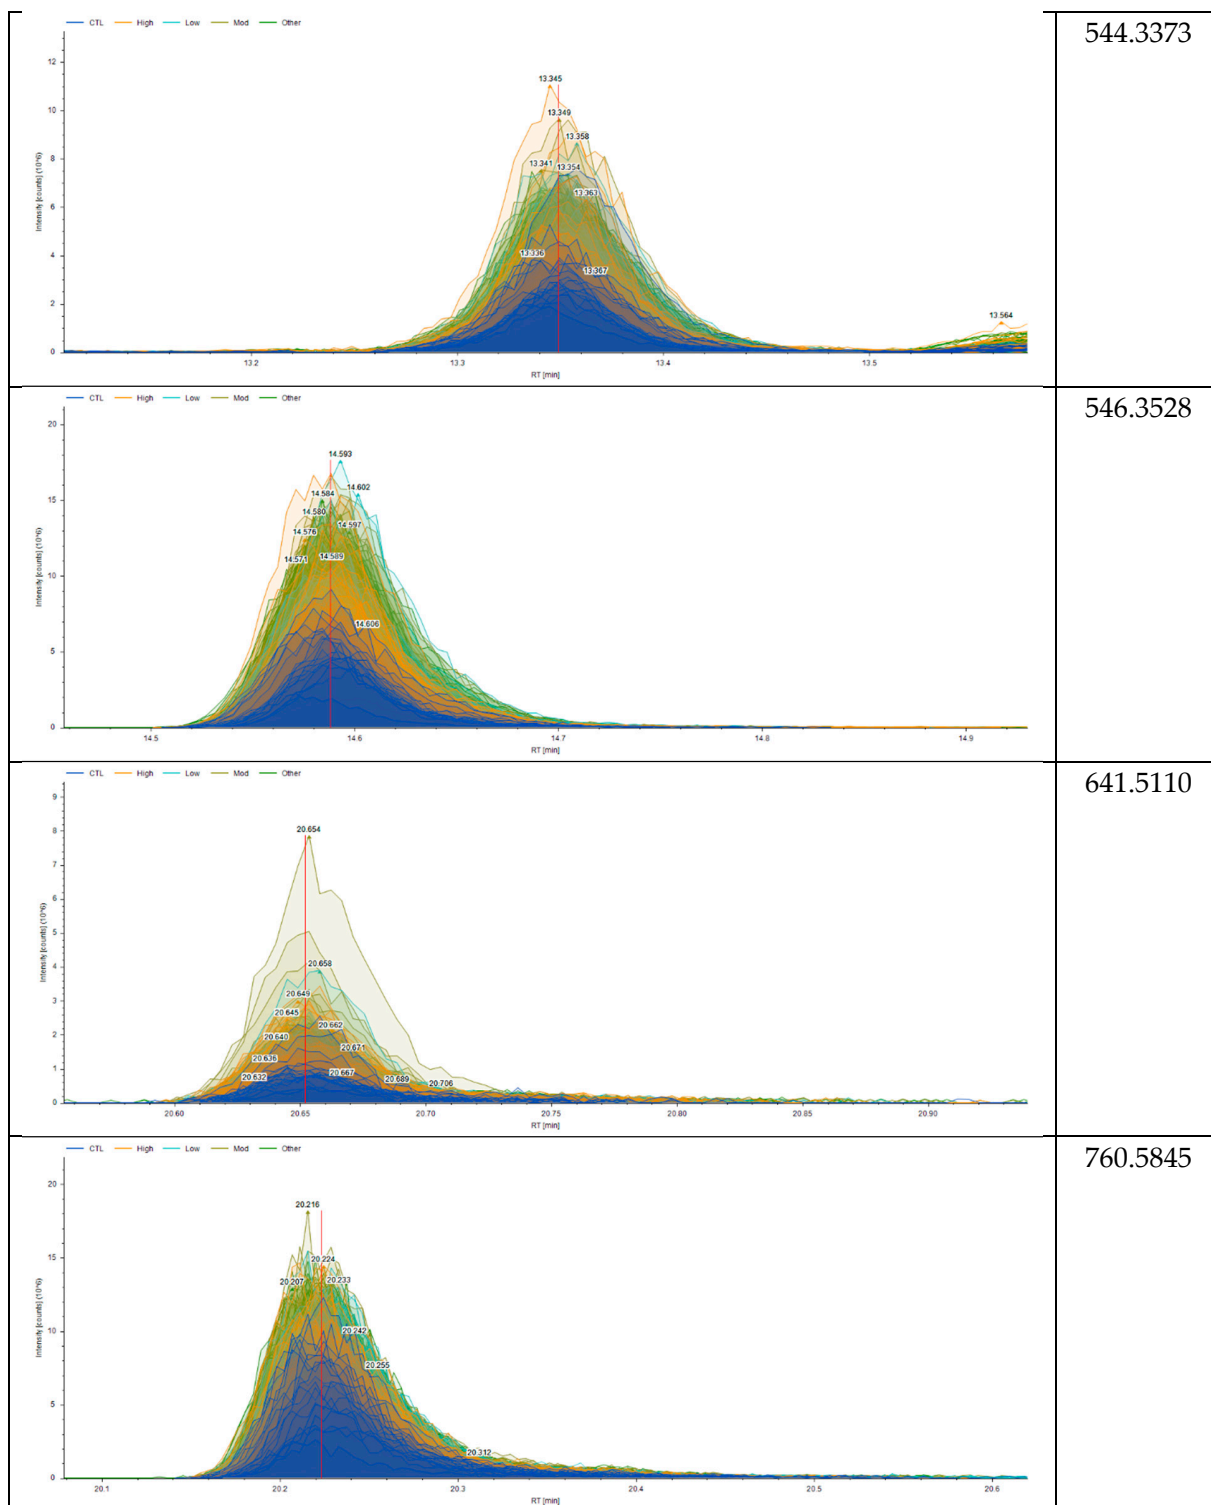

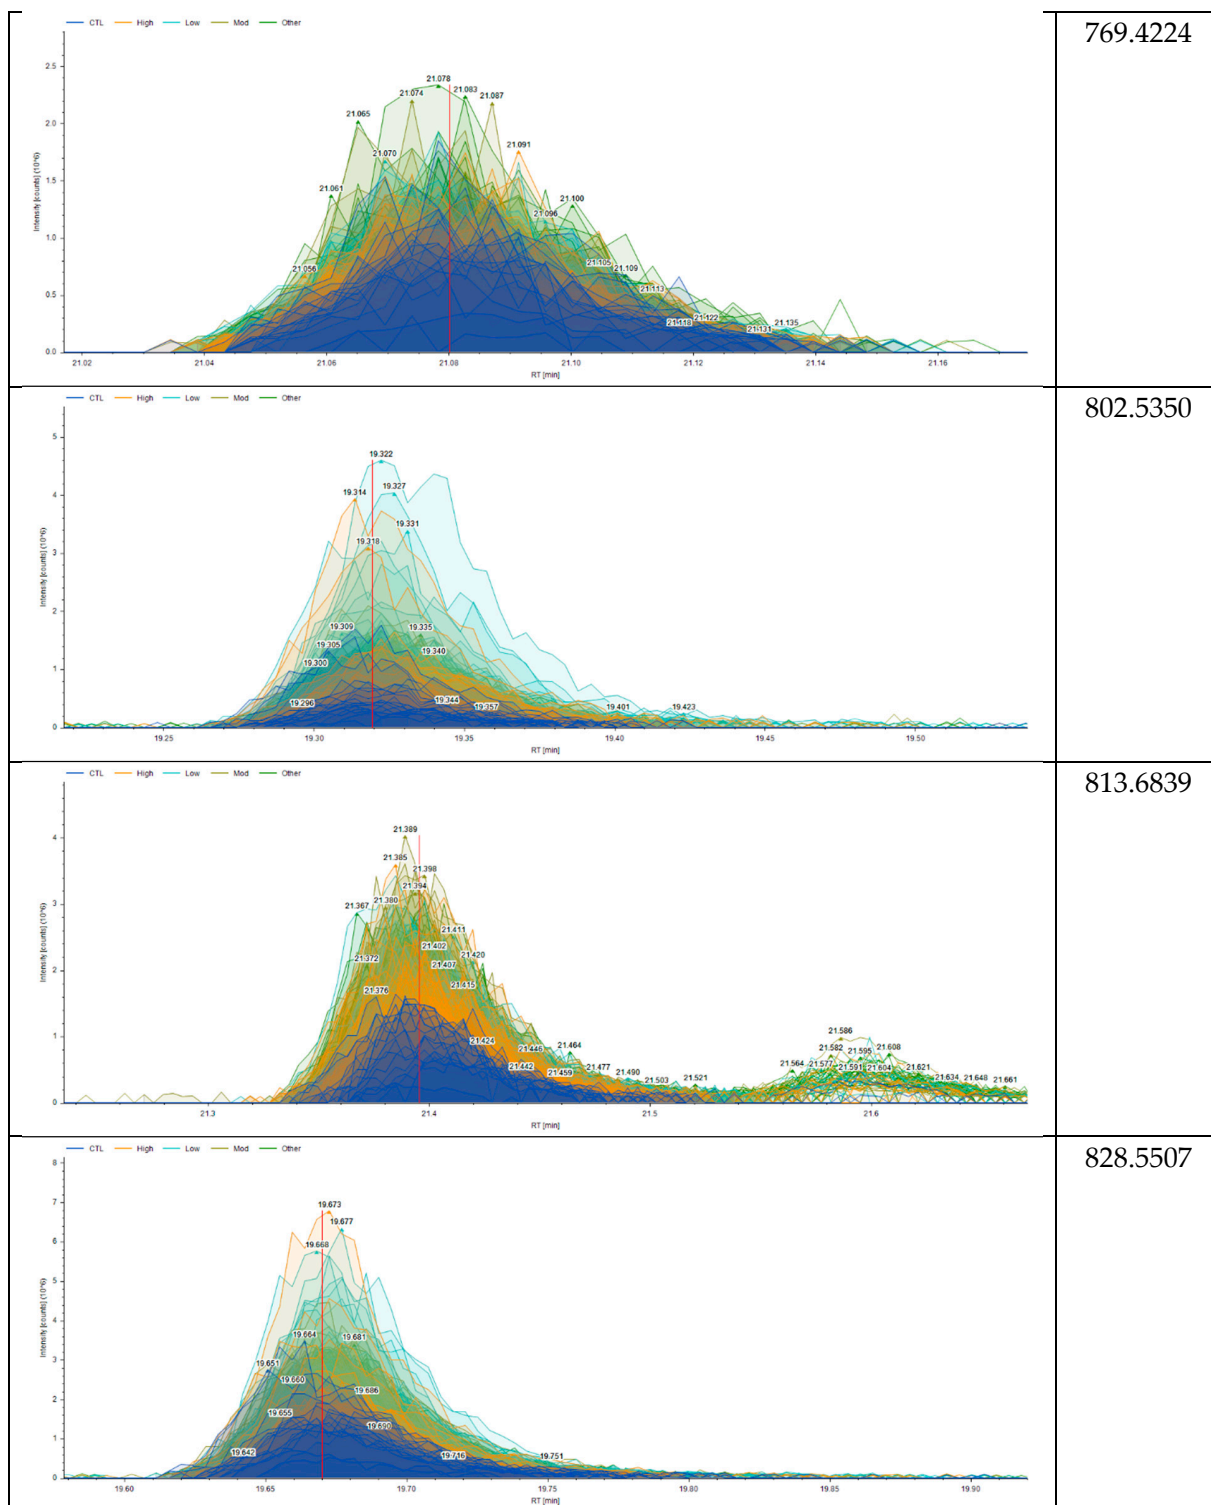

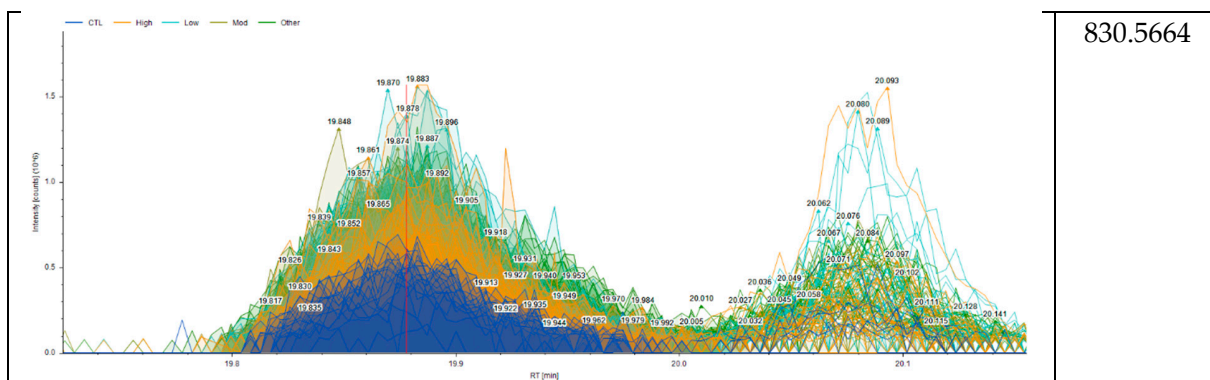

Table S2: Peaks of summarized negative mode features

| Feature Peak                                                                         | m/z      |
|--------------------------------------------------------------------------------------|----------|
| 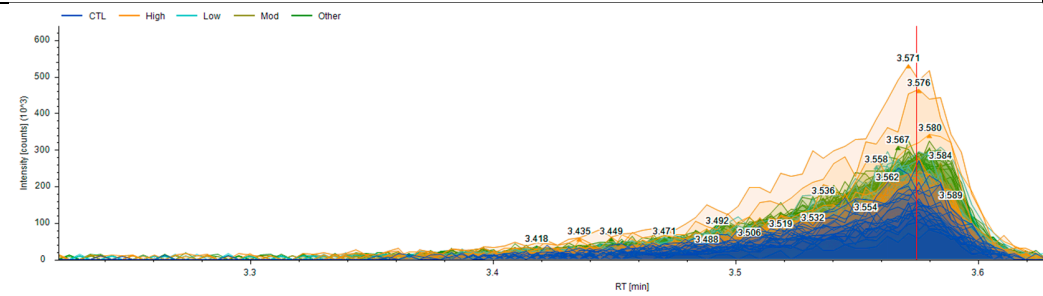   | 203.0830 |
|   | 212.0026 |
|  | 343.1707 |
|  | 388.1559 |

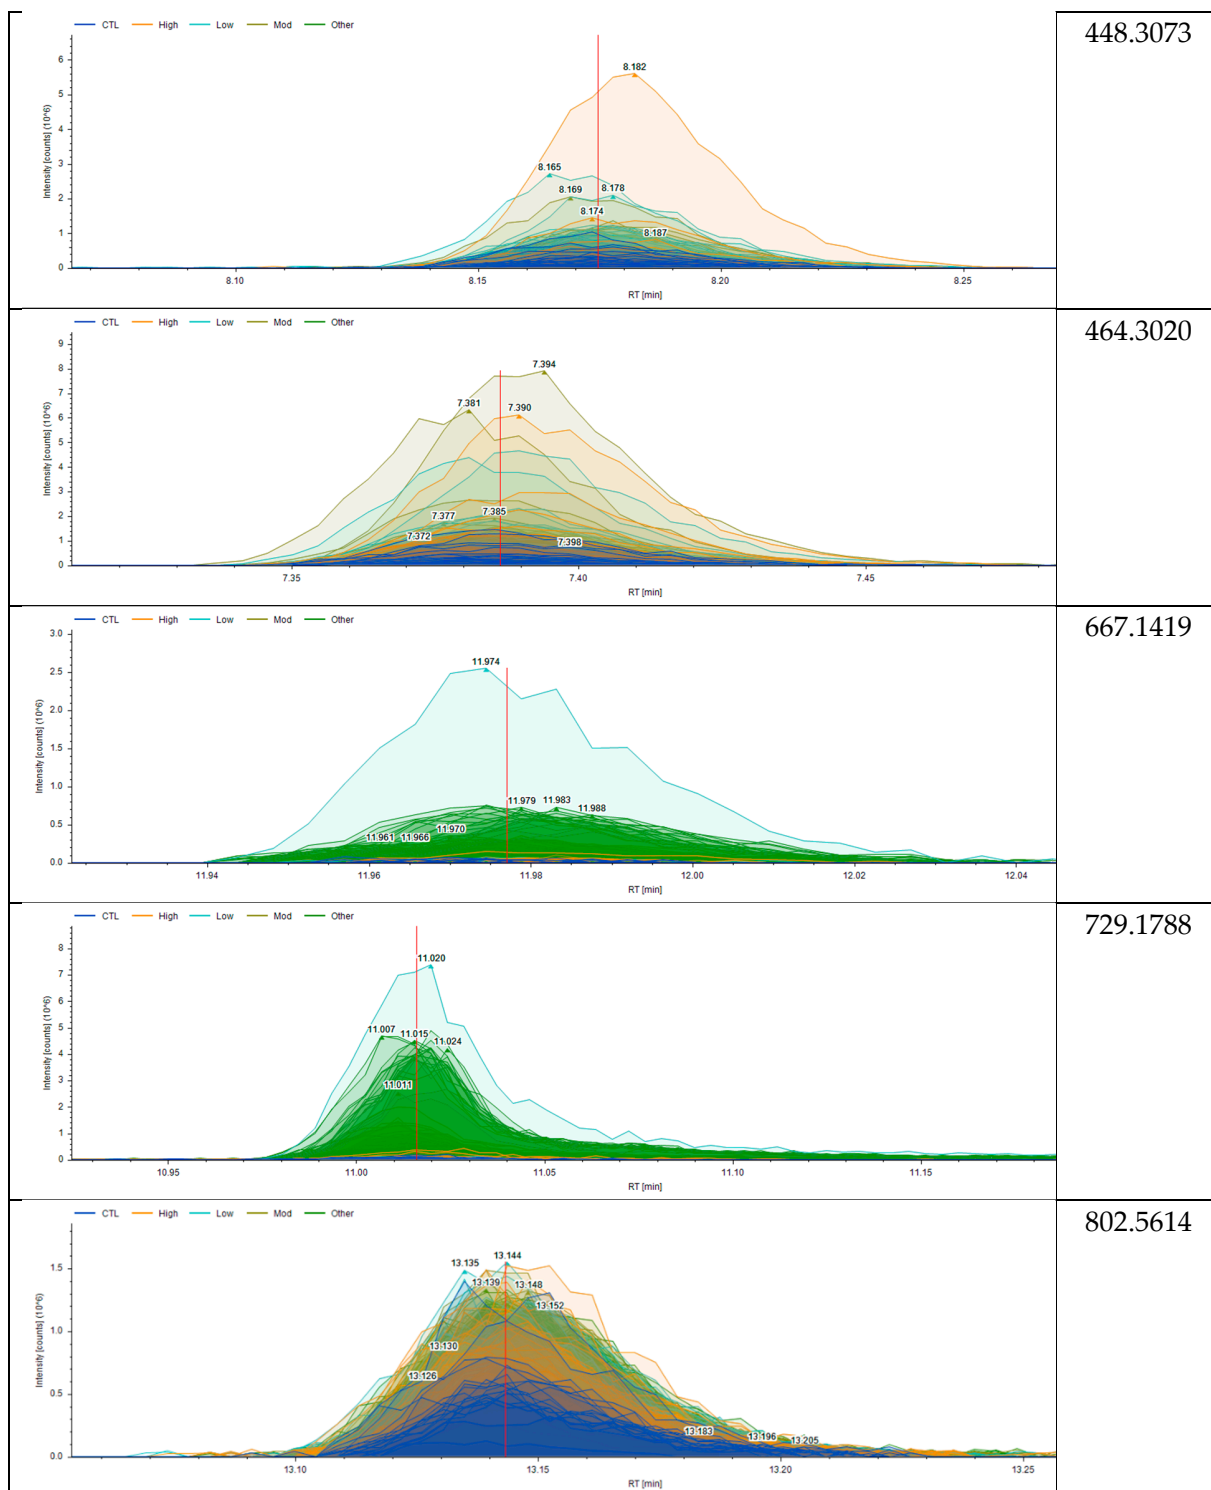



Table S3: Complete List of Tentatively Identified Endogenous Metabolites in Low vs. High Models

| m/z       | RT    | Tentative ID                     | Adduct                            | Monoisotopic Mass | Biological Significance                                                                                                                                        |
|-----------|-------|----------------------------------|-----------------------------------|-------------------|----------------------------------------------------------------------------------------------------------------------------------------------------------------|
| 412.4147* | 14.78 | 17Z-hexacosenoic acid            | [M+NH <sub>4</sub> ] <sup>+</sup> | 394.3811          | Very long chain fatty acid                                                                                                                                     |
|           |       | Ximenic acid                     | [M+NH <sub>4</sub> ] <sup>+</sup> | 394.3811          | Very long chain fatty acid                                                                                                                                     |
| 546.3528  | 14.59 | Cholylhistidine                  | [M+H] <sup>+</sup>                | 545.3465          | Bile acid-amino acid conjugates                                                                                                                                |
|           |       | 2-LysoPhosphatidylcholine        | [M+Na] <sup>+</sup>               | 523.3638          | LysoPhosphatidylcholine                                                                                                                                        |
|           |       | LysoPC(0:0/18:0)                 | [M+Na] <sup>+</sup>               | 523.3638          | LysoPhosphatidylcholine                                                                                                                                        |
|           |       | LysoPC(20:3(8Z,11Z,14Z)/0:0)     | [M+H] <sup>+</sup>                | 545.3481          | LysoPhosphatidylcholine                                                                                                                                        |
|           |       | LysoPC(20:3(5Z,8Z,11Z)/0:0)      | [M+H] <sup>+</sup>                | 545.3481          | LysoPhosphatidylcholine                                                                                                                                        |
|           |       | LysoPC(18:0/0:0)                 | [M+Na] <sup>+</sup>               | 523.3638          | LysoPhosphatidylcholine                                                                                                                                        |
|           |       | Platelet-activating factor       | [M+Na] <sup>+</sup>               | 523.3638          | Potent phospholipid activator and mediator of inflammation that has an important role in the pathogenesis of inflammatory disorders and cardiovascular disease |
| 544.3373  | 13.35 | LysoPC(0:0/20:4(5Z,8Z,11Z,14Z))  | [M+H] <sup>+</sup>                | 543.3325          | LysoPhosphatidylcholine                                                                                                                                        |
|           |       | LysoPC(0:0/18:1(9Z))             | [M+Na] <sup>+</sup>               | 521.3481          | LysoPhosphatidylcholine                                                                                                                                        |
|           |       | LysoPC(20:4(8Z,11Z,14Z,17Z)/0:0) | [M+H] <sup>+</sup>                | 543.3325          | LysoPhosphatidylcholine                                                                                                                                        |
|           |       | LysoPC(20:4(5Z,8Z,11Z,14Z)/0:0)  | [M+H] <sup>+</sup>                | 543.3325          | LysoPhosphatidylcholine                                                                                                                                        |
|           |       | LysoPC(18:1(11Z)/0:0)            | [M+Na] <sup>+</sup>               | 521.3481          | LysoPhosphatidylcholine                                                                                                                                        |
|           |       | LysoPC(18:1(9Z)/0:0)             | [M+Na] <sup>+</sup>               | 521.3481          | LysoPhosphatidylcholine                                                                                                                                        |
| 116.0708  | 0.60  | Proline                          | [M+H] <sup>+</sup>                | 115.0633          | Amino acid                                                                                                                                                     |
| 427.1938  | 5.74  | dermatan L-iduronate             | [M+NH <sub>4</sub> ] <sup>+</sup> | 409.1584          | N-acyl-alpha-hexosamines                                                                                                                                       |
|           |       | Chondroitin D-glucuronate        | [M+NH <sub>4</sub> ] <sup>+</sup> | 409.1584          | N-acyl-alpha-hexosamines                                                                                                                                       |
| 496.3397  | 12.95 | LysoPC(0:0/16:0)                 | [M+H] <sup>+</sup>                | 495.3325          | LysoPhosphatidylcholine                                                                                                                                        |

|          |       |                                          |                                   |          |                                                                                                                                                                                                                                                             |
|----------|-------|------------------------------------------|-----------------------------------|----------|-------------------------------------------------------------------------------------------------------------------------------------------------------------------------------------------------------------------------------------------------------------|
|          |       | 1-PalmitoylPhosphatidylcholine           | [M+H] <sup>+</sup>                | 495.3325 | PalmitoylPhosphatidylcholine                                                                                                                                                                                                                                |
|          |       | 23-Acetoxysoladulcidine                  | [M+Na] <sup>+</sup>               | 473.3505 | Steroidal alkaloid                                                                                                                                                                                                                                          |
|          |       | LysoPC(16:0/0:0)                         | [M+H] <sup>+</sup>                | 495.3325 | LysoPhosphatidylcholine                                                                                                                                                                                                                                     |
|          |       | Clupanodonyl carnitine                   | [M+Na] <sup>+</sup>               | 473.3505 | Acylcarnitine                                                                                                                                                                                                                                               |
|          |       | Docosa-4,7,10,13,16-pentaenoyl carnitine | [M+Na] <sup>+</sup>               | 473.3505 | Acylcarnitine                                                                                                                                                                                                                                               |
| 373.2735 | 9.79  | Cervonoyl ethanolamide                   | [M+H] <sup>+</sup>                | 372.2664 | N-acelethanolamines – A class of lipid compounds as constituents of membrane-bound phospholipid N-acylphosphatidylethanolamine (NAPE). Released from NAPE in response to stimuli and attributed to neurotransmission, membrane protection, immunomodulation |
| 520.3398 | 12.33 | LysoPC(0:0/18:2(9Z,12Z))                 | [M+H] <sup>+</sup>                | 519.3325 | LysoPhosphatidylcholine                                                                                                                                                                                                                                     |
|          |       | LysoPC(18:2(9Z,12Z)/0:0)                 | [M+H] <sup>+</sup>                | 519.3325 | LysoPhosphatidylcholine                                                                                                                                                                                                                                     |
| 370.2950 | 8.20  | N-Oleoyl-L-Serine                        | [M+H] <sup>+</sup>                | 369.2879 | acyl-l-alpha-amino acids – Secondary metabolite for defense, signalling or from incomplete metabolism                                                                                                                                                       |
|          |       | Myristoleoylcarnitine                    | [M+H] <sup>+</sup>                | 369.2879 | Acylcarnitines                                                                                                                                                                                                                                              |
|          |       | trans-2-Tetradecenoylcarnitine           | [M+H] <sup>+</sup>                | 369.2879 | Acylcarnitines                                                                                                                                                                                                                                              |
|          |       | MG(18:3(9Z,12Z,15Z)/0:0/0:0)             | [M+NH <sub>4</sub> ] <sup>+</sup> | 352.2614 | Monoacylglyceride                                                                                                                                                                                                                                           |
|          |       | MG(18:3(6Z,9Z,12Z)/0:0/0:0)              | [M+NH <sub>4</sub> ] <sup>+</sup> | 352.2614 | Monoacylglyceride                                                                                                                                                                                                                                           |
|          |       | MG(0:0/18:3(6Z,9Z,12Z)/0:0)              | [M+NH <sub>4</sub> ] <sup>+</sup> | 352.2614 | Monoacylglyceride                                                                                                                                                                                                                                           |
|          |       | MG(0:0/18:3(9Z,12Z,15Z)/0:0)             | [M+NH <sub>4</sub> ] <sup>+</sup> | 352.2614 | Monoacylglyceride                                                                                                                                                                                                                                           |
|          |       | cis-5-Tetradecenoylcarnitine             | [M+H] <sup>+</sup>                | 369.2879 | long-chain fatty acids                                                                                                                                                                                                                                      |
| 289.1409 | 5.12  | pentadeca-3,5,7-trienedioic acid         | [M+Na] <sup>+</sup>               | 266.1518 | Acylcarnitine                                                                                                                                                                                                                                               |
|          |       | pentadeca-5,7,9-trienedioic acid         | [M+Na] <sup>+</sup>               | 266.1518 | Acylcarnitine                                                                                                                                                                                                                                               |

|          |      |                                               |                                   |          |                                                                                                                                                                            |
|----------|------|-----------------------------------------------|-----------------------------------|----------|----------------------------------------------------------------------------------------------------------------------------------------------------------------------------|
|          |      | (2E,6E,10E)-pentadeca-2,6,10-trienedioic acid | [M+Na] <sup>+</sup>               | 266.1518 | Acylcarnitine                                                                                                                                                              |
|          |      | pentadeca-4,7,10-trienedioic acid             | [M+Na] <sup>+</sup>               | 266.1518 | Acylcarnitine                                                                                                                                                              |
|          |      | pentadeca-4,6,8-trienedioic acid              | [M+Na] <sup>+</sup>               | 266.1518 | Acylcarnitine                                                                                                                                                              |
|          |      | pentadeca-2,5,8-trienedioic acid              | [M+Na] <sup>+</sup>               | 266.1518 | Acylcarnitine                                                                                                                                                              |
|          |      | pentadeca-3,6,9-trienedioic acid              | [M+Na] <sup>+</sup>               | 266.1518 | Acylcarnitine                                                                                                                                                              |
|          |      | pentadeca-2,4,6-trienedioic acid              | [M+Na] <sup>+</sup>               | 266.1518 | Acylcarnitine                                                                                                                                                              |
|          |      | (3E,5Z,11Z)-pentadeca-3,5,11-trienedioic acid | [M+Na] <sup>+</sup>               | 266.1518 | Acylcarnitine                                                                                                                                                              |
| 356.2793 | 7.49 | 15-Hydroperoxyeicosa-8Z,11Z,13E-trienoate     | [M+NH <sub>4</sub> ] <sup>+</sup> | 338.2457 | Hydroperoxyeicosatrienoic                                                                                                                                                  |
|          |      | 6,7-dihydro-12-epi-LTB <sub>4</sub>           | [M+NH <sub>4</sub> ] <sup>+</sup> | 338.2457 | Eicosanoid                                                                                                                                                                 |
|          |      | 10,11-dihydro-leukotriene B <sub>4</sub>      | [M+NH <sub>4</sub> ] <sup>+</sup> | 338.2457 | Metabolite of lipid omega-oxidation of leukotriene B <sub>4</sub> (LTB <sub>4</sub> ). LTB <sub>4</sub> is the major metabolite in neutrophil polymorphonuclear leukocytes |
|          |      | 12-Keto-tetrahydro-leukotriene B <sub>4</sub> | [M+NH <sub>4</sub> ] <sup>+</sup> | 338.2457 | Eicosanoid                                                                                                                                                                 |
|          |      | 5,6-DHET                                      | [M+NH <sub>4</sub> ] <sup>+</sup> | 338.2457 | Epoxide intermediate in the oxygenation of arachidonic acid by hepatic monooxygenases pathway                                                                              |
|          |      | 11,12-DiHETrE                                 | [M+NH <sub>4</sub> ] <sup>+</sup> | 338.2457 | Cytochrome P450 (P450) Eicosanoid                                                                                                                                          |
|          |      | 8,9-DiHETrE                                   | [M+NH <sub>4</sub> ] <sup>+</sup> | 338.2457 | Cytochrome P450 (P450) Eicosanoid                                                                                                                                          |
|          |      | 14,15-DiHETrE                                 | [M+NH <sub>4</sub> ] <sup>+</sup> | 338.2457 | Cytochrome P450 (P450) Eicosanoid                                                                                                                                          |
|          |      | undec-3-enedioic acid                         | [M+H] <sup>+</sup>                | 214.1205 | Medium-chain fatty acids                                                                                                                                                   |

|          |      |                                          |                                   |          |                                                                                                                                                                                                                                                                                                                              |
|----------|------|------------------------------------------|-----------------------------------|----------|------------------------------------------------------------------------------------------------------------------------------------------------------------------------------------------------------------------------------------------------------------------------------------------------------------------------------|
|          |      | undec-4-enedioic acid                    | [M+H] <sup>+</sup>                | 214.1205 | Medium-chain fatty acids                                                                                                                                                                                                                                                                                                     |
|          |      | (2E)-undec-2-enedioic acid               | [M+H] <sup>+</sup>                | 214.1205 | Medium-chain fatty acids                                                                                                                                                                                                                                                                                                     |
|          |      | undec-5-enedioic acid                    | [M+H] <sup>+</sup>                | 214.1205 | Medium-chain fatty acids                                                                                                                                                                                                                                                                                                     |
|          |      | (3E)-pent-3-enoic acid                   | [M+NH <sub>4</sub> ] <sup>+</sup> | 100.0524 | Straight chain fatty acids                                                                                                                                                                                                                                                                                                   |
|          |      | 3-Methylbut-3-enoic acid                 | [M+NH <sub>4</sub> ] <sup>+</sup> | 100.0524 | Methyl-branched fatty acids                                                                                                                                                                                                                                                                                                  |
|          |      | N-Methyl-4-aminobutyric acid             | [M+H] <sup>+</sup>                | 117.0790 | Gamma-amino acid/derivative                                                                                                                                                                                                                                                                                                  |
|          |      | 2-Pentenoic acid                         | [M+NH <sub>4</sub> ] <sup>+</sup> | 100.0524 | Straight chain fatty acids                                                                                                                                                                                                                                                                                                   |
|          |      | 4-Pentenoic acid                         | [M+NH <sub>4</sub> ] <sup>+</sup> | 100.0524 | Straight chain fatty acids                                                                                                                                                                                                                                                                                                   |
|          |      | D-Valine                                 | [M+H] <sup>+</sup>                | 117.0790 | Valine and derivatives                                                                                                                                                                                                                                                                                                       |
|          |      | Senecioic acid                           | [M+NH <sub>4</sub> ] <sup>+</sup> | 100.0524 | Methyl-branched fatty acids – Found in mealy bug species, Madeira cockroach, and Southern long-nosed bats. Also appears in urine of patients with 3-Methylcrotonic aciduria caused by 3-hydroxy-3-methylglutaryl-CoA lyase deficiency                                                                                        |
|          |      | Betaine                                  | [M+H] <sup>+</sup>                | 118.0868 | Trimethylated amino acid – Found in beet. Associated with metabolic syndrome, lipid disorders, and diabetes, and may have a role in vascular and other diseases. Betaine has been used in the treatment of liver disorders, for hyperkalemia, for homocystinuria, for hypochlorhydria, and for gastrointestinal disturbances |
|          |      | L-Valine                                 | [M+H] <sup>+</sup>                | 117.0790 | Alpha amino acid                                                                                                                                                                                                                                                                                                             |
| 118.0865 | 0.59 | 5-Aminopentanoic acid                    | [M+H] <sup>+</sup>                | 117.0790 | Lysine degradation product that can also indicate bacterial overgrowth or endogenous tissue necrosis. Normal metabolite in saliva. Function as weak inhibitor of blood clotting pathway and as weak GABA agonist.                                                                                                            |
| 668.5443 | 8.65 | DG(20:3(8Z,11Z,14Z)-2OH(5,6)/0:0/i-16:0) | [M+NH <sub>4</sub> ] <sup>+</sup> | 650.5122 | Diacylglycerols- glycerolipids containing a common glycerol backbone with at least one                                                                                                                                                                                                                                       |

|          |      |                                          |                                   |          |                                                                                                                                                                    |
|----------|------|------------------------------------------|-----------------------------------|----------|--------------------------------------------------------------------------------------------------------------------------------------------------------------------|
|          |      |                                          |                                   |          | fatty acyl group esterified. Involved in the phospholipid metabolic pathway                                                                                        |
|          |      | DG(i-16:0/0:0/20:3(8Z,11Z,14Z)-2OH(5,6)) | [M+NH <sub>4</sub> ] <sup>+</sup> | 650.5122 | Diacylglycerols- glycerolipids containing a common glycerol backbone with at least one fatty acyl group esterified. Involved in the phospholipid metabolic pathway |
|          |      | DG(20:3(8Z,11Z,14Z)-2OH(5,6)/i-16:0/0:0) | [M+NH <sub>4</sub> ] <sup>+</sup> | 650.5122 | Diacylglycerols- glycerolipids containing a common glycerol backbone with at least one fatty acyl group esterified. Involved in the phospholipid metabolic pathway |
|          |      | DG(i-16:0/20:3(8Z,11Z,14Z)-2OH(5,6)/0:0) | [M+NH <sub>4</sub> ] <sup>+</sup> | 650.5122 | Diacylglycerols- glycerolipids containing a common glycerol backbone with at least one fatty acyl group esterified. Involved in the phospholipid metabolic pathway |
|          |      | DG(20:3(8Z,11Z,14Z)-2OH(5,6)/0:0/16:0)   | [M+NH <sub>4</sub> ] <sup>+</sup> | 650.5122 | Diacylglycerols- glycerolipids containing a common glycerol backbone with at least one fatty acyl group esterified. Involved in the phospholipid metabolic pathway |
|          |      | DG(16:0/0:0/20:3(8Z,11Z,14Z)-2OH(5,6))   | [M+NH <sub>4</sub> ] <sup>+</sup> | 650.5122 | Diacylglycerols- glycerolipids containing a common glycerol backbone with at least one fatty acyl group esterified. Involved in the phospholipid metabolic pathway |
|          |      | DG(20:3(8Z,11Z,14Z)-2OH(5,6)/16:0/0:0)   | [M+NH <sub>4</sub> ] <sup>+</sup> | 650.5122 | Diacylglycerols- glycerolipids containing a common glycerol backbone with at least one fatty acyl group esterified. Involved in the phospholipid metabolic pathway |
|          |      | DG(16:0/20:3(8Z,11Z,14Z)-2OH(5,6)/0:0)   | [M+NH <sub>4</sub> ] <sup>+</sup> | 650.5122 | Diacylglycerols- glycerolipids containing a common glycerol backbone with at least one fatty acyl group esterified. Involved in the phospholipid metabolic pathway |
| 359.2190 | 9.40 | Prostaglandin C1(1-)                     | [M+Na] <sup>+</sup>               | 336.2301 | Prostaglandin and related compounds                                                                                                                                |

|  |  |                                                              |                                   |          |                                                                                                                |
|--|--|--------------------------------------------------------------|-----------------------------------|----------|----------------------------------------------------------------------------------------------------------------|
|  |  | Prostaglandin C1                                             | [M+Na] <sup>+</sup>               | 336.2301 | Prostaglandin and related compounds                                                                            |
|  |  | 12,20-DiHETE                                                 | [M+Na] <sup>+</sup>               | 336.2301 | Hydroxyeicosatetraenoic acids                                                                                  |
|  |  | 9-Deoxy-delta12-PGD2                                         | [M+Na] <sup>+</sup>               | 336.2301 | Prostaglandin and related compounds                                                                            |
|  |  | 6,7-dihydro-5-oxo-12-epi-LTB4                                | [M+Na] <sup>+</sup>               | 336.2301 | Product of Leukotriene B4 beta-oxidation                                                                       |
|  |  | 10,11-dihydro-12-oxo-LTB4                                    | [M+Na] <sup>+</sup>               | 336.2301 | Product of Leukotriene B4 beta-oxidation                                                                       |
|  |  | Prostaglandin B-1                                            | [M+Na] <sup>+</sup>               | 336.2301 | Prostaglandin and related compounds                                                                            |
|  |  | Prostaglandin A-1                                            | [M+Na] <sup>+</sup>               | 336.2301 | Prostaglandin and related compounds                                                                            |
|  |  | 7-Acetylintermedine                                          | [M+NH <sub>4</sub> ] <sup>+</sup> | 341.1838 | Alkaloids and derivatives – Found in borage                                                                    |
|  |  | Acetyllycopsamine                                            | [M+NH <sub>4</sub> ] <sup>+</sup> | 341.1838 | Alkaloids and derivatives                                                                                      |
|  |  | 9alpha-(3-Methylbutanoyloxy)-4S-hydroxy-10(14)-oplopen-3-one | [M+Na] <sup>+</sup>               | 336.2301 | Sesquiterpenoids                                                                                               |
|  |  | 7-Acetyllycopsamine                                          | [M+NH <sub>4</sub> ] <sup>+</sup> | 341.1838 | Alkaloids and derivatives                                                                                      |
|  |  | Methyl-[8]-gingerol                                          | [M+Na] <sup>+</sup>               | 336.2301 | Dimethoxybenzenes – Found in ginger                                                                            |
|  |  | [9]-Gingerol                                                 | [M+Na] <sup>+</sup>               | 336.2301 | Gingerol – Found in ginger                                                                                     |
|  |  | (14S)-14,15-Dihydroxy-8(17),13(16)-labdadien-19-oic acid     | [M+Na] <sup>+</sup>               | 336.2301 | Diterpenoids                                                                                                   |
|  |  | ent-1(10)-Halimene-15,19-dioic acid                          | [M+Na] <sup>+</sup>               | 336.2301 | Carbocyclic fatty acids                                                                                        |
|  |  | 5-Hydroperoxyicosa-6,8,11,14-tetraenoic acid (5-HPETE)       | [M+Na] <sup>+</sup>               | 336.2301 | Hydroperoxyeicosatetraenoic acids                                                                              |
|  |  | 5-HPETE                                                      | [M+Na] <sup>+</sup>               | 336.2301 | Hydroperoxyeicosatetraenoic acids                                                                              |
|  |  | 8,15-DiHETE                                                  | [M+Na] <sup>+</sup>               | 336.2301 | Double oxidation product of arachidonic acid via 15-lipoxygenase. Eosinophil chemotactic factor of anaphylaxis |
|  |  | 5,15-DiHETE                                                  | [M+Na] <sup>+</sup>               | 336.2301 | Hydroxyeicosatetraenoic acids                                                                                  |
|  |  | 17,18-DiHETE                                                 | [M+Na] <sup>+</sup>               | 336.2301 | Hydroxyeicosatetraenoic acids                                                                                  |
|  |  | 14,15-DiHETE                                                 | [M+Na] <sup>+</sup>               | 336.2301 | Hydroxyeicosatetraenoic acids                                                                                  |

|  |  |                               |                     |          |                                                                                                                                                                                                                                                                                                   |
|--|--|-------------------------------|---------------------|----------|---------------------------------------------------------------------------------------------------------------------------------------------------------------------------------------------------------------------------------------------------------------------------------------------------|
|  |  | 12(S)-Leukotriene B4          | [M+Na] <sup>+</sup> | 336.2301 | Agonist of G-protein-coupled receptors for leukotriene B4, BLT1, and BLT2                                                                                                                                                                                                                         |
|  |  | 6-trans-12-epi-Leukotriene B4 | [M+Na] <sup>+</sup> | 336.2301 | Metabolite of lipid omega-oxidation of leukotriene B4                                                                                                                                                                                                                                             |
|  |  | 6-trans-Leukotriene B4        | [M+Na] <sup>+</sup> | 336.2301 | Enzymatic metabolite of leukotriene B4. Increases after stimulation with calcium-ionophore in asthma patients compared to healthy controls                                                                                                                                                        |
|  |  | 15H-11,12-EETA                | [M+Na] <sup>+</sup> | 336.2301 | Epoxyeicosatrienoic acids                                                                                                                                                                                                                                                                         |
|  |  | 8(S)-HPETE                    | [M+Na] <sup>+</sup> | 336.2301 | Hydroperoxyeicosatetraenoic acids                                                                                                                                                                                                                                                                 |
|  |  | 12(R)-HPETE                   | [M+Na] <sup>+</sup> | 336.2301 | Hydroperoxyeicosatetraenoic acids – Involved in conversion of arachidonic acid to 12(R)-HETE                                                                                                                                                                                                      |
|  |  | 11H-14,15-EETA                | [M+Na] <sup>+</sup> | 336.2301 | Epxoyeicosatrienoic acids                                                                                                                                                                                                                                                                         |
|  |  | 11(R)-HPETE                   | [M+Na] <sup>+</sup> | 336.2301 | Hydroperoxyeicosatetraenoic acids – Formed from arachidonic acid in prostaglandin endoperoxide H synthase-1 cyclooxygenase site                                                                                                                                                                   |
|  |  | Hepoxilin B3                  | [M+Na] <sup>+</sup> | 336.2301 | Normal human epidermis Eicosanoid – Dramatically elevated in psoriatic lesions.                                                                                                                                                                                                                   |
|  |  | Hepoxilin A3                  | [M+Na] <sup>+</sup> | 336.2301 | Electrophilic Eicosanoids synthesized during arachidonic acid oxidative metabolism                                                                                                                                                                                                                |
|  |  | 12(S)-HPETE                   | [M+Na] <sup>+</sup> | 336.2301 | Monohydroperoxy fatty acids produced by non-enzymatic oxidation of arachidonic acids.                                                                                                                                                                                                             |
|  |  | 15(S)-HPETE                   | [M+Na] <sup>+</sup> | 336.2301 | Hydroperoxyeicosatetraenoic acid – Corresponding hydroperoxide of 15(S)-HETE. Initiates apoptosis in vascular smooth muscle cells. Lipoxygenase metabolite that affect expression of cell adhesion molecules involved in adhesion of leukocytes and/or accumulation of leukocytes in the vascular |

|  |  |                                       |                     |          |                                                                                                                                                                                                             |
|--|--|---------------------------------------|---------------------|----------|-------------------------------------------------------------------------------------------------------------------------------------------------------------------------------------------------------------|
|  |  |                                       |                     |          | endothelium (Initial events in endothelial cell injury). Enhances activity of enzymes lipoxygenase and Na <sup>+</sup> ,K <sup>+</sup> -ATPase of brain microvessels                                        |
|  |  | Prostaglandin B1                      | [M+Na] <sup>+</sup> | 336.2301 | Metabolite of PGE1. Inhibit arachidonic acid mobilization in human neutrophils and endothelial cells. Enhances peripheral vascular resistance and elevate blood pressure. Blocks S-phase DNA synthesis      |
|  |  | Prostaglandin A1                      | [M+Na] <sup>+</sup> | 336.2301 | Prostaglandin characterized by cyclopentenone structure. Antiviral ability, induce heat shock protein synthesis, tumor suppressant.                                                                         |
|  |  | 8-iso-PGA1                            | [M+Na] <sup>+</sup> | 336.2301 | Isoprostane – Produced by peroxidative attack of membrane lipids. Associated with asthma, hypertension, ischemia reperfusion injury. Marker of oxidative stress                                             |
|  |  | 5(S)-Hydroperoxyeicosatetraenoic acid | [M+Na] <sup>+</sup> | 336.2301 | Lipid hydroperoxide precursor of leukotrienes. Produced from arachidonic acid. Implicated with cancer, cardiovascular disease, neurodegeneration                                                            |
|  |  | Leukotriene B4                        | [M+Na] <sup>+</sup> | 336.2301 | Major metabolite in neutrophil polymorphonuclear leukocytes. Pro-inflammation. Recruits and activates neutrophils, monocytes, eosinophils. Stimulates production of proinflammatory cytokines and mediators |

Note: \* = Clear peak, but peak shape is subpar



Table S4: Complete List of Tentatively Identified Exogenous Metabolites in Low vs. High Models

| m/z      | RT    | Tentative ID                        | Adduct                            | Monoisotopic Mass | Biological Significance                                                                                                         |
|----------|-------|-------------------------------------|-----------------------------------|-------------------|---------------------------------------------------------------------------------------------------------------------------------|
| 603.2990 | 12.95 | Hordatine B                         | [M+Na] <sup>+</sup>               | 580.3122          | 2-arylbenzofuran flavonoids – Found in barley and cereals                                                                       |
| 412.4147 | 14.78 | trans-2-Hexacosenoic acid           | [M+NH <sub>4</sub> ] <sup>+</sup> | 394.3811          | Very long chain fatty acids                                                                                                     |
|          |       | 10,12-Hexacosanedione               | [M+NH <sub>4</sub> ] <sup>+</sup> | 394.3811          | Beta-diketones - Found in fats and oil                                                                                          |
|          |       | 6,8-Hexacosanedione                 | [M+NH <sub>4</sub> ] <sup>+</sup> | 394.3811          | Beta-diketones - Found in fats and oil                                                                                          |
|          |       | 5,7-Hexacosanedione                 | [M+NH <sub>4</sub> ] <sup>+</sup> | 394.3811          | Beta-diketones - Found in fats and oil                                                                                          |
|          |       | 11,13-Hexacosanedione               | [M+NH <sub>4</sub> ] <sup>+</sup> | 394.3811          | Beta-diketones - Found in fats and oil                                                                                          |
|          |       | 4,6-Hexacosanedione                 | [M+NH <sub>4</sub> ] <sup>+</sup> | 394.3811          | Beta-diketones - Found in fats and oil                                                                                          |
|          |       | 7,9-Hexacosanedione                 | [M+NH <sub>4</sub> ] <sup>+</sup> | 394.3811          | Beta-diketones - Found in fats and oil                                                                                          |
| 245.1146 | 5.61  | 3,5-Diisopropylsalicylic acid       | [M+Na] <sup>+</sup>               | 222.1256          | Salicylic acids                                                                                                                 |
|          |       | 3-Hexylsalicylic acid               | [M+Na] <sup>+</sup>               | 222.1256          | Salicylic acids                                                                                                                 |
|          |       | (+)-Dehydrovomifoliol               | [M+Na] <sup>+</sup>               | 222.1256          | Sesquiterpenoids – Found in rice                                                                                                |
|          |       | Hexyl salicylic acid                | [M+Na] <sup>+</sup>               | 222.1256          | O-hydroxybenzoic acid esters                                                                                                    |
|          |       | 3-Hydroxyibuprofen                  | [M+Na] <sup>+</sup>               | 222.1256          | Phenylpropanoic acids – Metabolite of ibuprofen, a nonsteroidal anti-inflammatory drug for relief of arthritis, fever, and pain |
|          |       | 2-Hydroxyibuprofen                  | [M+Na] <sup>+</sup>               | 222.1256          | Phenylpropanoic acids – Metabolite of ibuprofen, a nonsteroidal anti-inflammatory drug for relief of arthritis, fever, and pain |
|          |       | 1-Hydroxyibuprofen                  | [M+Na] <sup>+</sup>               | 222.1256          | Phenylpropanoic acids – Metabolite of ibuprofen, a nonsteroidal anti-inflammatory drug for relief of arthritis, fever, and pain |
|          |       | Methyl 3-epi-4,5-didehydrojasmonate | [M+Na] <sup>+</sup>               | 222.1256          | Methyl esters                                                                                                                   |

|          |      |                                                                                                                                                             |                                   |          |                                                                                                                                                                                                                                            |
|----------|------|-------------------------------------------------------------------------------------------------------------------------------------------------------------|-----------------------------------|----------|--------------------------------------------------------------------------------------------------------------------------------------------------------------------------------------------------------------------------------------------|
|          |      | Annuionone B                                                                                                                                                | [M+Na] <sup>+</sup>               | 222.1256 | Oxepanes – Found in fats, oils, sunflowers                                                                                                                                                                                                 |
|          |      | Isoamyl p-anisate                                                                                                                                           | [M+Na] <sup>+</sup>               | 222.1256 | P-methoxybenzoic acids and derivatives                                                                                                                                                                                                     |
|          |      | Dehydrovomifoliol                                                                                                                                           | [M+Na] <sup>+</sup>               | 222.1256 | Sesquiterpenoids                                                                                                                                                                                                                           |
|          |      | Piribedil                                                                                                                                                   | [M+Na] <sup>+</sup>               | 298.1430 | N-arylpiperiazines                                                                                                                                                                                                                         |
|          |      | (2S,3S,4R,5R)-5-(6-Aminopurin-9-yl)-N-cyclopropyl-3,4-dihydroxyoxolane-2-carboxamide                                                                        | [M+H] <sup>+</sup>                | 320.1233 | (AKA CPCA) Purine nucleoside -                                                                                                                                                                                                             |
|          |      | (2S,3S,4S,5S)-2-(5-Amino-7-methyl-2,6,7,9,11-pentazatricyclo[6.3.1.0 <sup>4,12</sup> ]dodeca-1(12),3,5,8,10-pentaen-2-yl)-5-(hydroxymethyl)oxolane-3,4-diol | [M+H] <sup>+</sup>                | 320.1233 | Glycosylamines                                                                                                                                                                                                                             |
|          |      | D-Fructosazine                                                                                                                                              | [M+H] <sup>+</sup>                | 320.1220 | Pyrazines                                                                                                                                                                                                                                  |
|          |      | Gynocardin                                                                                                                                                  | [M+NH <sub>4</sub> ] <sup>+</sup> | 303.0954 | Cyanogenic glycosides – Found                                                                                                                                                                                                              |
|          |      | 3,7,8,15-Scirpenetetrol                                                                                                                                     | [M+Na] <sup>+</sup>               | 298.1416 | Trichothecenes                                                                                                                                                                                                                             |
|          |      | Toxin T2 tetrol                                                                                                                                             | [M+Na] <sup>+</sup>               | 298.1416 | Type-a Trichothecene mycotoxin produced by Fusarium species. Associated with weight loss, diarrhea, lethargy, low plasma glucose, decreases in blood cell and leukocyte count. damage to cartilaginous tissues, and induction of apoptosis |
|          |      | Isomugineic acid                                                                                                                                            | [M+H] <sup>+</sup>                | 320.1220 | Gamma amino acids and derivatives – Found in barleys, and cereal                                                                                                                                                                           |
| 321.1307 | 4.55 | Nialamide                                                                                                                                                   | [M+Na] <sup>+</sup>               | 298.1430 | Pyridinecarboxylic acids and derivatives – Non-selective, irreversible monoamine oxidase inhibitor of hydrazine class that was                                                                                                             |

|          |       |                                                                                                                                              |                                   |             |                                                                                                                                                |
|----------|-------|----------------------------------------------------------------------------------------------------------------------------------------------|-----------------------------------|-------------|------------------------------------------------------------------------------------------------------------------------------------------------|
|          |       |                                                                                                                                              |                                   |             | used as antidepressant. Withdrawn due to risk of hepatotoxicity                                                                                |
| 544.3373 | 13.35 | (S)-1-(Sec-Butyl)-N-((4,6-dimethyl-2-oxo-1,2-dihydropyridin-3-yl)methyl)-3-methyl-6-(6-(piperazin-1-yl)pyridin-3-yl)-1H-indole-4-carboxamide | [M+NH <sub>4</sub> ] <sup>+</sup> | 526.3056245 | Pyridinylpiperazines                                                                                                                           |
| 195.0876 | 3.38  | Luminol                                                                                                                                      | [M+NH <sub>4</sub> ] <sup>+</sup> | 177.0538    | Phthalazinones                                                                                                                                 |
|          |       | 1,3,9-Trimethylxanthine                                                                                                                      | [M+H] <sup>+</sup>                | 194.0804    | (AKA Isocaffeine) Xanthines                                                                                                                    |
|          |       | 3-[(2-Mercapto-1-methylpropyl)thio]-2-butanol                                                                                                | [M+H] <sup>+</sup>                | 194.0799    | Secondary alcohols                                                                                                                             |
|          |       | 4-Aminophthalhydrazide                                                                                                                       | [M+NH <sub>4</sub> ] <sup>+</sup> | 177.0538    | Phthalazinones                                                                                                                                 |
|          |       | Enprofylline                                                                                                                                 | [M+H] <sup>+</sup>                | 194.0804    | Xanthines – Drug for managing asthma, peripheral vascular disease, cerebrovascular insufficiency, sickle cell disease, and diabetic neuropathy |
|          |       | Caffeine                                                                                                                                     | [M+H] <sup>+</sup>                | 194.0804    | Methyl xanthine alkaloid or purine.                                                                                                            |
|          |       | N-Allylglycine                                                                                                                               | [M+H] <sup>+</sup>                | 115.0633    | Alpha amino acids                                                                                                                              |
|          |       | 2-Pentenedial                                                                                                                                | [M+NH <sub>4</sub> ] <sup>+</sup> | 98.0368     | Enals                                                                                                                                          |
| 116.0708 | 0.60  | 5-Hydroxy-1-methylpyrrolidin-2-one                                                                                                           | [M+H] <sup>+</sup>                | 115.0633    | N-alkylpyrrolidines                                                                                                                            |
|          |       | N-(2-Hydroxyethyl)acrylamide                                                                                                                 | [M+H] <sup>+</sup>                | 115.0633    | (AKA PNHEA or polyduramide) n-acylethanolamines                                                                                                |
|          |       | 5-Methyl-3(2H)-furanone                                                                                                                      | [M+NH <sub>4</sub> ] <sup>+</sup> | 98.0368     | Furanones                                                                                                                                      |
|          |       | alpha-Methylene-gamma-butyrolactone                                                                                                          | [M+NH <sub>4</sub> ] <sup>+</sup> | 98.0368     | Gamma butyrolactones                                                                                                                           |
|          |       | DL-Allylglycine                                                                                                                              | [M+H] <sup>+</sup>                | 115.0633    | Alpha amino acids                                                                                                                              |
|          |       | Acetamidopropanal                                                                                                                            | [M+H] <sup>+</sup>                | 115.0633    | Acetamidopropanal is associated with urea cycle and metabolism of arginine, proline, glutamate, aspartate and asparagine                       |

|          |      |                                                                          |                                   |          |                                                                                                                                                                                                                                    |
|----------|------|--------------------------------------------------------------------------|-----------------------------------|----------|------------------------------------------------------------------------------------------------------------------------------------------------------------------------------------------------------------------------------------|
|          |      | 2-Furanmethanol                                                          | [M+NH <sub>4</sub> ] <sup>+</sup> | 98.0368  | Heteroaromatic compounds – Found in cereals, potato, white mustards, arabica coffee, cocoa                                                                                                                                         |
|          |      | 5-Methyl-2(3H)-furanone                                                  | [M+NH <sub>4</sub> ] <sup>+</sup> | 98.0368  | Butenolides – Found in blackberries                                                                                                                                                                                                |
|          |      | Pterolactam                                                              | [M+H] <sup>+</sup>                | 115.0633 | Pyrrolidines – Found in green vegetables and root vegetables                                                                                                                                                                       |
|          |      | 5-Hydroxy-4-pentenoic acid d-lactone                                     | [M+NH <sub>4</sub> ] <sup>+</sup> | 98.0368  | Dihydropyranones – Found in nuts                                                                                                                                                                                                   |
|          |      | 4-Amino-2-methylenebutanoic acid                                         | [M+H] <sup>+</sup>                | 115.0633 | Gamma amino acids and derivatives                                                                                                                                                                                                  |
| 427.1938 | 5.74 | Mesprenone                                                               | [M+H] <sup>+</sup>                | 426.1865 | Spironolactones and derivatives – Steroid lactones                                                                                                                                                                                 |
|          |      | Queuosine                                                                | [M+NH <sub>4</sub> ] <sup>+</sup> | 409.1597 | Pyrrolopyrimidine nucleosides and nucleotides. Found in bacteria                                                                                                                                                                   |
|          |      | Pisumionoside                                                            | [M+Na] <sup>+</sup>               | 404.2046 | Pisumionoside                                                                                                                                                                                                                      |
|          |      | Linustatin                                                               | [M+NH <sub>4</sub> ] <sup>+</sup> | 409.1584 | Cyanogenic glycosides – Found in beans, pear shea tree, longan                                                                                                                                                                     |
|          |      | Queuosine                                                                | [M+NH <sub>4</sub> ] <sup>+</sup> | 409.1597 | Modified nucleoside present in tRNAs in bacteria and eukaryotes                                                                                                                                                                    |
|          |      | Flunarizine                                                              | [M+Na] <sup>+</sup>               | 404.2064 | Diphenylmethanes – Drug for prophylaxis of migraine, occlusive peripheral vascular disease, vertigo of central and peripheral origin, and adjuvant in therapy of epilepsy. Involved in flunarizine h1-antihistamine action pathway |
| 373.2735 | 9.79 | Cesamet                                                                  | [M+H] <sup>+</sup>                | 372.2664 | (AKA Nabilone) Naphthopyranones                                                                                                                                                                                                    |
|          |      | (3R, 6'Z)-3,4-Dihydro-8-hydroxy-3-(6-pentadecenyl)-1H-2-benzopyran-1-one | [M+H] <sup>+</sup>                | 372.2664 | 2-benzopyrans                                                                                                                                                                                                                      |
| 448.3057 | 8.77 | Piritramide                                                              | [M+NH <sub>4</sub> ] <sup>+</sup> | 430.2733 | Synthetic opioid analgesic used for treatment of postoperative pain                                                                                                                                                                |

|          |      |                                                                                           |                                   |          |                                                                                                                                                                                                                          |
|----------|------|-------------------------------------------------------------------------------------------|-----------------------------------|----------|--------------------------------------------------------------------------------------------------------------------------------------------------------------------------------------------------------------------------|
|          |      | 2-(2-Methylbutanoyl)-9-(3-methyl-2E-pentenoyl)-2b,9a-dihydroxy-4Z,10(14)-oplopadien-3-one | [M+NH <sub>4</sub> ] <sup>+</sup> | 430.2719 | Sesquiterpenoids                                                                                                                                                                                                         |
| 338.0165 | 8.26 | Efavirenz                                                                                 | [M+Na] <sup>+</sup>               | 315.0274 | Benzoxazines – antiretroviral drug for preventing HIV transmission and treating HIV type 1. Non-nucleoside reverse transcriptase inhibitor principally metabolized by cytochrome P450 system to hydroxylated metabolites |
| 159.1168 | 5.53 | 1-Phenyl-1-cyclohexene                                                                    | [M+H] <sup>+</sup>                | 158.1096 | Benzene and substituted derivatives                                                                                                                                                                                      |
| 355.2630 | 9.79 | 1,1'-[1,12-Dodecanediylbis(oxy)]bisbenzene                                                | [M+H] <sup>+</sup>                | 354.2559 | Phenol ethers – Found in nuts                                                                                                                                                                                            |
| 370.2950 | 8.20 | 3-Ethyl-4-(9-hydroxy-4,6,8,10-tetramethyl-7-oxododec-4-en-2-yl)oxetan-2-one               | [M+NH <sub>4</sub> ] <sup>+</sup> | 352.2614 | Terpene lactones                                                                                                                                                                                                         |
|          |      | Tetradecenoylcarnitine                                                                    | [M+H] <sup>+</sup>                | 369.2879 | long-chain fatty acids                                                                                                                                                                                                   |
| 289.1409 | 5.12 | Zaprinast                                                                                 | [M+NH <sub>4</sub> ] <sup>+</sup> | 271.1069 | Triazolopyrimidines                                                                                                                                                                                                      |
|          |      | Deoxyqinghaosu                                                                            | [M+Na] <sup>+</sup>               | 266.1518 | Dioxolopyrans                                                                                                                                                                                                            |
|          |      | Deoxyartemisinin                                                                          | [M+Na] <sup>+</sup>               | 266.1518 | Metabolite of Artemisinin, a drug against Plasmodium falciparum malaria                                                                                                                                                  |
|          |      | Sporol                                                                                    | [M+Na] <sup>+</sup>               | 266.1518 | 1,3-dioxepanes                                                                                                                                                                                                           |
|          |      | 1alpha,15-Dihydroxymarasmene                                                              | [M+Na] <sup>+</sup>               | 266.1518 | Furofurans                                                                                                                                                                                                               |
|          |      | 3alpha,15-Dihydroxymarasmene                                                              | [M+Na] <sup>+</sup>               | 266.1518 | Furofurans – Found in mushrooms                                                                                                                                                                                          |
|          |      | Ipomeamaranol                                                                             | [M+Na] <sup>+</sup>               | 266.1518 | Fatty alcohols                                                                                                                                                                                                           |
|          |      | 10-Hydroxymyoporone                                                                       | [M+Na] <sup>+</sup>               | 266.1518 | Fatty alcohols                                                                                                                                                                                                           |
|          |      | Adhumulinic acid                                                                          | [M+Na] <sup>+</sup>               | 266.1518 | Beta-diketones – Found in alcoholic beverages                                                                                                                                                                            |
|          |      | Ipomeamaronolide                                                                          | [M+Na] <sup>+</sup>               | 266.1518 | Butenolides – Found in potato, root vegetables                                                                                                                                                                           |
|          |      | 7-Hydroxytrichodermol                                                                     | [M+Na] <sup>+</sup>               | 266.1518 | Gamma-butyrolactones                                                                                                                                                                                                     |

|          |      |                                                                                                          |                                   |          |                                                     |
|----------|------|----------------------------------------------------------------------------------------------------------|-----------------------------------|----------|-----------------------------------------------------|
|          |      | Isoleptospermone                                                                                         | [M+Na] <sup>+</sup>               | 266.1518 | Monocyclic monoterpenoids                           |
|          |      | [4]-Gingerol                                                                                             | [M+Na] <sup>+</sup>               | 266.1518 | Gingerol – Found in ginger                          |
|          |      | [4]-Isogingerol                                                                                          | [M+Na] <sup>+</sup>               | 266.1518 | Methoxyphenols – Found in ginger                    |
|          |      | Alkhanol                                                                                                 | [M+Na] <sup>+</sup>               | 266.1518 | Eudesmanolides                                      |
|          |      | 4'-Dihydroabscisic acid                                                                                  | [M+Na] <sup>+</sup>               | 266.1518 | Absisic acids and derivatives                       |
|          |      | Blennin D                                                                                                | [M+Na] <sup>+</sup>               | 266.1518 | Terpene lactones                                    |
|          |      | (1alpha,4alpha,5beta,6alpha,11betaH)-1,4-Epoxy-5-hydroxy-10(14)-germacren-12,6-olide                     | [M+Na] <sup>+</sup>               | 266.1518 | Gamma butyrolactones – Found in herbs and spices    |
|          |      | (6beta,8betaOH)-6,8-Dihydroxy-7(11)-eremophilen-12,8-olide                                               | [M+Na] <sup>+</sup>               | 266.1518 | Terpene lactones                                    |
|          |      | (R)-Athanagrandione                                                                                      | [M+Na] <sup>+</sup>               | 266.1518 | Aryl alkyl ketones – Found in potatoes              |
|          |      | Absindiol                                                                                                | [M+Na] <sup>+</sup>               | 266.1518 | Guaianolides and derivatives                        |
|          |      | 3,14-Dihydroxy-11,13-dihydrocostunolide                                                                  | [M+Na] <sup>+</sup>               | 266.1518 | Germacranolides and derivatives                     |
|          |      | Arlatin                                                                                                  | [M+Na] <sup>+</sup>               | 266.1518 | Guaianolides and derivatives                        |
|          |      | 1alpha-Hydroxyarbusculin A                                                                               | [M+Na] <sup>+</sup>               | 266.1518 | Eudesmanolides, secoeudesmanolides, and derivatives |
|          |      | Arabsin                                                                                                  | [M+Na] <sup>+</sup>               | 266.1518 | Eudesmanolides, secoeudesmanolides, and derivatives |
|          |      | Humulinic acid A                                                                                         | [M+Na] <sup>+</sup>               | 266.1518 | Vinylogous acids – Found in alcoholic beverages     |
| 356.2793 | 7.49 | Artemin                                                                                                  | [M+Na] <sup>+</sup>               | 266.1518 | Eudesmanolides, secoeudesmanolides, and derivatives |
|          |      | 11-Deoxy-PGE1                                                                                            | [M+NH <sub>4</sub> ] <sup>+</sup> | 338.2457 | Prostaglandin and related compounds                 |
|          |      | (+)-Zoapatanol                                                                                           | [M+NH <sub>4</sub> ] <sup>+</sup> | 338.2457 | Monocyclic monoterpenoids                           |
|          |      | Kirenol                                                                                                  | [M+NH <sub>4</sub> ] <sup>+</sup> | 338.2457 | Diterpenoids                                        |
|          |      | (3S,4S)-4-[(E,2S,6R,8S,9R,10R)-9-Hydroxy-4,6,8,10-tetramethyl-7-oxododec-4-en-2-yl]-3-methyloxetan-2-one | [M+NH <sub>4</sub> ] <sup>+</sup> | 338.2457 | Terpene lactones                                    |

|          |       |                                                            |                                   |          |                                                                                       |
|----------|-------|------------------------------------------------------------|-----------------------------------|----------|---------------------------------------------------------------------------------------|
|          |       | 3-Epiaphidicolin                                           | [M+NH <sub>4</sub> ] <sup>+</sup> | 338.2457 | Aphidicolane and stemodane diterpenoids                                               |
|          |       | 5,8,11-Eicosatrienoic acid, 14,15-dihydroxy-, (5Z,8Z,11Z)- | [M+NH <sub>4</sub> ] <sup>+</sup> | 338.2457 | Hydroxyeicosatrienoic acid                                                            |
|          |       | Sterebin E                                                 | [M+NH <sub>4</sub> ] <sup>+</sup> | 338.2457 | Diterpenoids                                                                          |
| 549.1857 | 16.38 | Neoacrimarine F                                            | [M+NH <sub>4</sub> ] <sup>+</sup> | 531.1529 | Triacylglycerols                                                                      |
|          |       | Neoacrimarine I                                            | [M+NH <sub>4</sub> ] <sup>+</sup> | 531.1529 | Acridones – Found in citrus                                                           |
| 235.0977 | 0.50  | Burimamide                                                 | [M+Na] <sup>+</sup>               | 212.1096 | Imidazoles – Primary metabolite involved in growth, development, reproduction         |
| 674.2887 | 19.63 | Leurubicin                                                 | [M+NH <sub>4</sub> ] <sup>+</sup> | 656.2581 | Anthracyclines                                                                        |
| 215.1279 | 4.78  | 2-Carboxy-5,7-dimethyl-4-octanolide                        | [M+H] <sup>+</sup>                | 214.1205 | Gamma butyrolactones                                                                  |
|          |       | 5-Hexyltetrahydro-2-oxo-3-furancarboxylic acid             | [M+H] <sup>+</sup>                | 214.1205 | Gamma butyrolactones                                                                  |
|          |       | alpha-Carboxy-delta-decalactone                            | [M+H] <sup>+</sup>                | 214.1205 | Delta valerolactones                                                                  |
| 437.2356 | 3.97  | Depropionylbezitramide                                     | [M+H] <sup>+</sup>                | 436.2263 | Diphenylacetoneitriles                                                                |
|          |       | Caldiamide                                                 | [M+NH <sub>4</sub> ] <sup>+</sup> | 419.2016 | Alpha amino acid amides                                                               |
| 118.0865 | 0.59  | Tert-Butyl carbamate                                       | [M+H] <sup>+</sup>                | 117.0790 | Carbamate esters                                                                      |
|          |       | 3-Amino-2,2-dimethylpropanoic acid                         | [M+H] <sup>+</sup>                | 117.0790 | Beta amino acids and derivatives                                                      |
|          |       | 2R-Hydroxymethyl-3S-hydroxypyrrolidine                     | [M+H] <sup>+</sup>                | 117.0790 | Pyrrolidines                                                                          |
|          |       | 3-methyl-4-cis-hydroxy-2-butenal                           | [M+NH <sub>4</sub> ] <sup>+</sup> | 100.0524 | Enals – Found in fennel, sorrel, savoy cabbage, hickory nuts                          |
|          |       | 2-Butenoic acid methyl ester                               | [M+NH <sub>4</sub> ] <sup>+</sup> | 100.0524 | Fatty acid esters – Found in papaya                                                   |
|          |       | 3-methyl-4-trans-hydroxy-2-butenal                         | [M+NH <sub>4</sub> ] <sup>+</sup> | 100.0524 | Enals – Found in tamarind, persian lime, European chestnut, sweet bay                 |
|          |       | 5-Valerolactone                                            | [M+NH <sub>4</sub> ] <sup>+</sup> | 100.0524 | Delta valerolactones                                                                  |
|          |       | Norvaline                                                  | [M+H] <sup>+</sup>                | 117.0790 | Non-proteinogenic branched-chain amino acids – Found in E. coli and Bacillus subtilis |

|  |  |                                 |                                   |          |                                                                                                                                        |
|--|--|---------------------------------|-----------------------------------|----------|----------------------------------------------------------------------------------------------------------------------------------------|
|  |  | DL-Norvaline                    | [M+H] <sup>+</sup>                | 117.0790 | Alpha amino acids – Found in anatidaes, chickens, buckwheats, pigs                                                                     |
|  |  | Methyl methacrylate             | [M+NH <sub>4</sub> ] <sup>+</sup> | 100.0524 | Enoate esters – Found in blackberries                                                                                                  |
|  |  | Dihydro-3-methyl-2(3H)-furanone | [M+NH <sub>4</sub> ] <sup>+</sup> | 100.0524 | Gamma butyrolactones – Found in fruits                                                                                                 |
|  |  | Angelic acid                    | [M+NH <sub>4</sub> ] <sup>+</sup> | 100.0524 | Found in fats and oils, constituent of Angelica archangelica. Formerly used as sedative                                                |
|  |  | Dihydro-5-methyl-2(3H)-furanone | [M+NH <sub>4</sub> ] <sup>+</sup> | 100.0524 | Gamma butyrolactones – Also considered fatty ester lipid                                                                               |
|  |  | 2,4-Pentanedione                | [M+NH <sub>4</sub> ] <sup>+</sup> | 100.0524 | Beta-diketones – Found in blackberries and papaya                                                                                      |
|  |  | 2-Methyltetrahydrofuran-3-one   | [M+NH <sub>4</sub> ] <sup>+</sup> | 100.0524 | Furanones – Flavouring agent in coffee                                                                                                 |
|  |  | 2,3-Pentanedione                | [M+NH <sub>4</sub> ] <sup>+</sup> | 100.0524 | Alpha-diketones – Found in coffee, tamarinds, cauliflowers, green beans, cereal                                                        |
|  |  | Ethyl acrylate                  | [M+NH <sub>4</sub> ] <sup>+</sup> | 100.0524 | Flavouring agent with potential carcinogenic properties                                                                                |
|  |  | 3-Methylbutyrolactone           | [M+NH <sub>4</sub> ] <sup>+</sup> | 100.0524 | Gamma butyrolactones – Found in anatidaes, chickens, pigs, pulses                                                                      |
|  |  | N-Methyl-a-aminoisobutyric acid | [M+H] <sup>+</sup>                | 117.0790 | Alpha amino acids – Found in anatidaes, chickens, pigs. Is a secondary metabolite                                                      |
|  |  | 2-Ethylacrylic acid             | [M+NH <sub>4</sub> ] <sup>+</sup> | 100.0524 | Alpha, beta-unsaturated monocarboxylic acid. Associated with 3-oxoacyl-CoA thiolase deficiency and methylmalonyl-CoA mutase deficiency |



|          |      |                                                                   |                                   |          |                                                                                                                                                                                                                     |
|----------|------|-------------------------------------------------------------------|-----------------------------------|----------|---------------------------------------------------------------------------------------------------------------------------------------------------------------------------------------------------------------------|
|          |      | Tiglic acid                                                       | [M+NH <sub>4</sub> ] <sup>+</sup> | 100.0524 | Monocarboxylic unsaturated organic acid – Found in croton oil and other natural products                                                                                                                            |
|          |      | Glutaral                                                          | [M+NH <sub>4</sub> ] <sup>+</sup> | 100.0524 | Antimicrobial agent in sugar mills and high fructose corn syrup                                                                                                                                                     |
|          |      | Vaporole                                                          | [M+H] <sup>+</sup>                | 117.0790 | Antianginal agent that also cause direct vasorelaxation through vascular generation of Nitric oxide and relaxation via cyclic guanosine monophosphate-dependent process                                             |
|          |      | Isopropenyl acetate                                               | [M+NH <sub>4</sub> ] <sup>+</sup> | 100.0524 | Enol esters                                                                                                                                                                                                         |
|          |      | Amyl Nitrite                                                      | [M+H] <sup>+</sup>                | 117.0790 | Organic o-nitroso compounds – Drug for rapid relief of angina pectoris                                                                                                                                              |
|          |      |                                                                   |                                   |          |                                                                                                                                                                                                                     |
| 235.1803 | 2.98 | 3-Methyl-alpha-pyrrolidinopropiophenone                           | [M+NH <sub>4</sub> ] <sup>+</sup> | 217.1467 | Alkyl-phenylketones                                                                                                                                                                                                 |
|          |      | 4'-Methyl-alpha-pyrrolidinopropiophenone                          | [M+NH <sub>4</sub> ] <sup>+</sup> | 217.1467 | Alkyl-phenylketones                                                                                                                                                                                                 |
|          |      | 1,2,3,4,5,6-Hexahydro-6,11-dimethyl-2,6-methano-3-benzazocin-8-ol | [M+NH <sub>4</sub> ] <sup>+</sup> | 217.1467 | 2,6-dimethyl-3-benzazocines                                                                                                                                                                                         |
|          |      | 1-Acetyl-2-(3-pyrrolidino-1-propynyl)piperidine                   | [M+H] <sup>+</sup>                | 234.1732 | N-acylpiperidines                                                                                                                                                                                                   |
|          |      | Ethoxyquin                                                        | [M+NH <sub>4</sub> ] <sup>+</sup> | 217.1467 | Antioxidant used in animal feeds, preservation of colour in production of chili powder, paprika, ground chili. Formerly used as pesticide/herbicide. Used as post-harvest dip for apples and pears to prevent scald |
|          |      | 5-Methyl-2,5-di-1-pyrrolidinyl-2-cyclopenten-1-one                | [M+H] <sup>+</sup>                | 234.1732 | N-alkylpyrrolidines                                                                                                                                                                                                 |
|          |      | Lidocaine                                                         | [M+H] <sup>+</sup>                | 234.1732 | Local anesthetic and cardiac depressant used as antiarrhythmia agent                                                                                                                                                |
| 331.0938 | 7.14 | 1-Nitrohydroxyphenyl-N-benzoylalanine                             | [M+H] <sup>+</sup>                | 330.0852 | Tyrosine and derivatives                                                                                                                                                                                            |

|          |      |                                                                                         |                                   |          |                                                                                                                                                                                                                                                                                            |
|----------|------|-----------------------------------------------------------------------------------------|-----------------------------------|----------|--------------------------------------------------------------------------------------------------------------------------------------------------------------------------------------------------------------------------------------------------------------------------------------------|
|          |      | Glyinflanin H                                                                           | [M+Na] <sup>+</sup>               | 308.1049 | 2-arylbenzofuran flavonoids – Found in tea. Secondary metabolite                                                                                                                                                                                                                           |
|          |      | Kanzonol U                                                                              | [M+Na] <sup>+</sup>               | 308.1049 | 2-arylbenzofuran flavonoids                                                                                                                                                                                                                                                                |
|          |      | Moracin G                                                                               | [M+Na] <sup>+</sup>               | 308.1049 | 2-arylbenzofuran flavonoids – Found in mulberries and fruits                                                                                                                                                                                                                               |
|          |      | Moracin E                                                                               | [M+Na] <sup>+</sup>               | 308.1049 | 2-arylbenzofuran flavonoids – Found in mulberries and fruits                                                                                                                                                                                                                               |
|          |      | Moracin D                                                                               | [M+Na] <sup>+</sup>               | 308.1049 | 2-arylbenzofuran flavonoids – Found in mulberries and fruits                                                                                                                                                                                                                               |
|          |      | (1S,2R,3S)-2,3-Dihydro-4-(4-hydroxyphenyl)-1H-phenalene-1,2,3-triol                     | [M+Na] <sup>+</sup>               | 308.1049 | Phenylnaphthalenes – Found in fruits                                                                                                                                                                                                                                                       |
|          |      | Warfarin                                                                                | [M+Na] <sup>+</sup>               | 308.1049 | Anticoagulant that inhibits synthesis of vitamin-K-dependent coagulation factors. Used for prophylaxis, venous thrombosis, pulmonary embolism, atrial fibrillation with embolization. Also used as rodenticide and adjunct in prophylaxis of systemic embolism after myocardial infarction |
| 359.2190 | 9.40 | (3E,7E,11R,12E)-11-Hydroxy-3,7,11,15-tetramethyl-14-oxohexadeca-3,7,12-trienoic acid    | [M+Na] <sup>+</sup>               | 336.2301 | Acyclic diterpenoids                                                                                                                                                                                                                                                                       |
|          |      | 1H-Purine-2,6-dione, 7-(2-(ethylamino)ethyl)-3,7-dihydro-1,3-dimethyl-8-(phenylmethyl)- | [M+NH <sub>4</sub> ] <sup>+</sup> | 341.1852 | Xanthines                                                                                                                                                                                                                                                                                  |
|          |      | 8S,15S-Dihydroxy-5Z,9E,11Z,13E-eicosatetraenoic acid                                    | [M+Na] <sup>+</sup>               | 336.2301 | Hydroxyeicosatetraenoic acids                                                                                                                                                                                                                                                              |
|          |      | 12-Hydroperoxy-5,8,10,14-eicosatetraenoic acid                                          | [M+Na] <sup>+</sup>               | 336.2301 | Hydroperoxyeicosatetraenoic acids                                                                                                                                                                                                                                                          |
|          |      | (+/-)-11,12-Dihydroxy-5Z,8Z,14Z,17Z-eicosatetraenoic acid                               | [M+Na] <sup>+</sup>               | 336.2301 | Hydroxyeicosatetraenoic acids                                                                                                                                                                                                                                                              |

|          |       |                                                                                                                             |                                   |          |                                                                         |
|----------|-------|-----------------------------------------------------------------------------------------------------------------------------|-----------------------------------|----------|-------------------------------------------------------------------------|
|          |       | 5(S),15(R)-DiHETE(1-)                                                                                                       | [M+Na] <sup>+</sup>               | 336.2301 | Hydroxyeicosatetraenoic acids                                           |
|          |       | 5(S),15(R)-DiHETE                                                                                                           | [M+Na] <sup>+</sup>               | 336.2301 | Eicosanoid lipid molecule                                               |
|          |       | 8,20-DiHETE                                                                                                                 | [M+Na] <sup>+</sup>               | 336.2301 | Hydroxyeicosatetraenoic acids                                           |
|          |       | 15-HPETE                                                                                                                    | [M+Na] <sup>+</sup>               | 336.2301 | Hydroperoxyeicosatraenoic acids                                         |
|          |       | (5Z,9E,14Z)-(8xi,11R,12S)-11,12-epoxy-8-hydroxyicosa-5,9,14-trienoic Acid                                                   | [M+Na] <sup>+</sup>               | 336.2301 | Hepoxilins                                                              |
|          |       | 5,20-DiHETE                                                                                                                 | [M+Na] <sup>+</sup>               | 336.2301 | Hydroxyeicosatetraenoic acids                                           |
|          |       | 5(S),11(R)-DiHETE                                                                                                           | [M+Na] <sup>+</sup>               | 336.2301 | Hydroxyeicosatetraenoic acids                                           |
|          |       | 10-hydroxy-11S,12S-epoxy-5Z,8Z,14Z-eicosatrienoic acid                                                                      | [M+Na] <sup>+</sup>               | 336.2301 | Hepoxilins                                                              |
|          |       | 5,12-dihydroxy-6,8,10,14-eicosatetraenoic acid                                                                              | [M+Na] <sup>+</sup>               | 336.2301 | Leukotrienes                                                            |
|          |       | Fenethylline                                                                                                                | [M+NH <sub>4</sub> ] <sup>+</sup> | 341.1852 | Xanthines                                                               |
|          |       | 15-Hydroperoxyicosa-5,8,11,13-tetraenoic acid                                                                               | [M+Na] <sup>+</sup>               | 336.2301 | Hydroperoxyeicosatraenoic acids                                         |
| 337.1559 | 10.65 | (2R,3S,9R)-5-Acetyl-8,8-dimethyl-7,16-diazapentacyclo[9.6.1.02,9.03,7.015,18]octadeca-1(17),11(18),12,14-tetraene-4,6-dione | [M+H] <sup>+</sup>                | 336.1474 | 3-alkylindoles                                                          |
|          |       | Valeroyl phenytoin                                                                                                          | [M+H] <sup>+</sup>                | 336.1474 | Phenylhydantoins                                                        |
|          |       | 17-Ethynyl-16-fluoroestradiol                                                                                               | [M+Na] <sup>+</sup>               | 314.1682 | Estrogens and derivatives                                               |
|          |       | 2-Propenamide, 2-cyano-3-(3,4-dihydroxyphenyl)-N-(4-phenylbutyl)-                                                           | [M+H] <sup>+</sup>                | 336.1474 | Hydroxycinnamic acids and derivatives                                   |
|          |       | Nb-Feruloyltryptamine                                                                                                       | [M+H] <sup>+</sup>                | 336.1474 | Hydroxycinnamic acids and derivatives – Found in cereal, fats, and oils |

Table S5: Complete List of Tentatively Identified Endogenous Metabolites in Moderate vs. High Models

| m/z      | RT    | Tentative ID                                          | Adduct                            | Monoisotopic Mass | Biological Significance                                                                                                |
|----------|-------|-------------------------------------------------------|-----------------------------------|-------------------|------------------------------------------------------------------------------------------------------------------------|
| 211.1441 | 3.90  | 2-Methyl-N-(4-Methylphenyl)alanine                    | [M+NH <sub>4</sub> ] <sup>+</sup> | 193.1103          | Alpha amino acids and derivatives                                                                                      |
|          |       | L,L-Cyclo(leucylprolyl)                               | [M+H] <sup>+</sup>                | 210.1368          | Alpha amino acids and derivatives – Secondary metabolite                                                               |
|          |       | (R)-1,2-dimethyl-5,6-dihydroxy-tetrahydroisoquinoline | [M+NH <sub>4</sub> ] <sup>+</sup> | 193.1103          | Derivative of Tetrahydroisoquinoline – Association with Parkinson's disease                                            |
|          |       | (R)-N-Methylsalsolinol                                | [M+NH <sub>4</sub> ] <sup>+</sup> | 193.1103          | Most potent toxin among isoquinolines – Endogenous neurotoxins for dopamine neurons. Implicated in Parkinson's disease |
| 215.1279 | 4.78  | undec-3-enedioic acid                                 | [M+H] <sup>+</sup>                | 214.1205          | Medium-chain fatty acids                                                                                               |
|          |       | undec-4-enedioic acid                                 | [M+H] <sup>+</sup>                | 214.1205          | Medium-chain fatty acids                                                                                               |
|          |       | (2E)-undec-2-enedioic acid                            | [M+H] <sup>+</sup>                | 214.1205          | Medium-chain fatty acids                                                                                               |
|          |       | undec-5-enedioic acid                                 | [M+H] <sup>+</sup>                | 214.1205          | Medium-chain fatty acids                                                                                               |
| 229.1433 | 5.30  | dodec-6-enedioic acid                                 | [M+H] <sup>+</sup>                | 228.1362          | Medium-chain fatty acid                                                                                                |
|          |       | dodec-4-enedioic acid                                 | [M+H] <sup>+</sup>                | 228.1362          | Medium-chain fatty acid                                                                                                |
|          |       | dodec-5-enedioic acid                                 | [M+H] <sup>+</sup>                | 228.1362          | Medium-chain fatty acid                                                                                                |
|          |       | dodec-2-enedioic acid                                 | [M+H] <sup>+</sup>                | 228.1362          | Medium-chain fatty acid                                                                                                |
|          |       | dodec-3-enedioic acid                                 | [M+H] <sup>+</sup>                | 228.1362          | Medium-chain fatty acid                                                                                                |
| 769.4224 | 21.08 | PG(20:4(8Z,11Z,14Z,17Z)-2OH(5S,6R)/i-12:0)            | [M+Na] <sup>+</sup>               | 746.4370          | Oxidized phosphatidylglycerol                                                                                          |
|          |       | PG(i-12:0/20:4(8Z,11Z,14Z,17Z)-2OH(5S,6R))            | [M+Na] <sup>+</sup>               | 746.4370          | Oxidized phosphatidylglycerol                                                                                          |
|          |       | PG(20:4(6E,8Z,11Z,13E)-2OH(5S,15S)/i-12:0)            | [M+Na] <sup>+</sup>               | 746.4370          | Oxidized phosphatidylglycerol                                                                                          |
|          |       | PG(i-12:0/20:4(6E,8Z,11Z,13E)-2OH(5S,15S))            | [M+Na] <sup>+</sup>               | 746.4370          | Oxidized phosphatidylglycerol                                                                                          |
|          |       | PG(20:4(6Z,8E,10E,14Z)-2OH(5S,12R)/i-12:0)            | [M+Na] <sup>+</sup>               | 746.4370          | Oxidized phosphatidylglycerol                                                                                          |
|          |       | PG(i-12:0/20:4(6Z,8E,10E,14Z)-2OH(5S,12R))            | [M+Na] <sup>+</sup>               | 746.4370          | Oxidized phosphatidylglycerol                                                                                          |
| 760.5845 | 20.22 | 1-Palmitoyl-2-oleoyl-sn-glycero-3-phosphocholine      | [M+H] <sup>+</sup>                | 759.5778          | Phosphatidylcholines                                                                                                   |

|  |  |                                      |                    |          |                                    |
|--|--|--------------------------------------|--------------------|----------|------------------------------------|
|  |  | PE-NMe <sub>2</sub> (20:1(11Z)/15:0) | [M+H] <sup>+</sup> | 759.5778 | Dimethylphosphatidylethanolamine   |
|  |  | PE-NMe(22:1(13Z)/14:0)               | [M+H] <sup>+</sup> | 759.5778 | Monomethylphosphatidylethanolamine |
|  |  | PE-NMe(22:0/14:1(9Z))                | [M+H] <sup>+</sup> | 759.5778 | Monomethylphosphatidylethanolamine |
|  |  | PE-NMe(20:1(11Z)/16:0)               | [M+H] <sup>+</sup> | 759.5778 | Monomethylphosphatidylethanolamine |
|  |  | PE-NMe(20:0/16:1(9Z))                | [M+H] <sup>+</sup> | 759.5778 | Monomethylphosphatidylethanolamine |
|  |  | PE-NMe(18:1(9Z)/18:0)                | [M+H] <sup>+</sup> | 759.5778 | Monomethylphosphatidylethanolamine |
|  |  | PE-NMe(18:1(11Z)/18:0)               | [M+H] <sup>+</sup> | 759.5778 | Monomethylphosphatidylethanolamine |
|  |  | PE-NMe(14:0/22:1(13Z))               | [M+H] <sup>+</sup> | 759.5778 | Monomethylphosphatidylethanolamine |
|  |  | PE-NMe <sub>2</sub> (15:0/20:1(11Z)) | [M+H] <sup>+</sup> | 759.5778 | Dimethylphosphatidylethanolamine   |
|  |  | PE-NMe(16:1(9Z)/20:0)                | [M+H] <sup>+</sup> | 759.5778 | Monomethylphosphatidylethanolamine |
|  |  | PE-NMe(14:1(9Z)/22:0)                | [M+H] <sup>+</sup> | 759.5778 | Monomethylphosphatidylethanolamine |
|  |  | PE-NMe(16:0/20:1(11Z))               | [M+H] <sup>+</sup> | 759.5778 | Monomethylphosphatidylethanolamine |
|  |  | PE-NMe(18:0/18:1(11Z))               | [M+H] <sup>+</sup> | 759.5778 | Monomethylphosphatidylethanolamine |
|  |  | PE-NMe(18:0/18:1(9Z))                | [M+H] <sup>+</sup> | 759.5778 | Monomethylphosphatidylethanolamine |
|  |  | PE(22:1(13Z)/15:0)                   | [M+H] <sup>+</sup> | 759.5778 | phosphatidylethanolamine           |
|  |  | PE(15:0/22:1(13Z))                   | [M+H] <sup>+</sup> | 759.5778 | Phosphatidylethanolamine           |
|  |  | PC(20:1(11Z)/14:0)                   | [M+H] <sup>+</sup> | 759.5778 | Phosphatidylcholine                |
|  |  | PC(20:0/14:1(9Z))                    | [M+H] <sup>+</sup> | 759.5778 | Phosphatidylcholine                |

|          |       |                                            |                     |          |                                    |
|----------|-------|--------------------------------------------|---------------------|----------|------------------------------------|
|          |       | PC(18:1(9Z)/16:0)                          | [M+H] <sup>+</sup>  | 759.5778 | Phosphatidylcholine                |
|          |       | PC(18:1(11Z)/16:0)                         | [M+H] <sup>+</sup>  | 759.5778 | Phosphatidylcholine                |
|          |       | PC(18:0/16:1(9Z))                          | [M+H] <sup>+</sup>  | 759.5778 | Phosphatidylcholine                |
|          |       | PC(16:1(9Z)/18:0)                          | [M+H] <sup>+</sup>  | 759.5778 | Phosphatidylcholine                |
|          |       | PC(16:0/18:1(9Z))                          | [M+H] <sup>+</sup>  | 759.5778 | Phosphatidylcholine                |
|          |       | PC(16:0/18:1(11Z))                         | [M+H] <sup>+</sup>  | 759.5778 | Phosphatidylcholine                |
|          |       | PC(14:1(9Z)/20:0)                          | [M+H] <sup>+</sup>  | 759.5778 | Phosphatidylcholine                |
|          |       | PC(14:0/20:1(11Z))                         | [M+H] <sup>+</sup>  | 759.5778 | Phosphatidylcholine                |
| 802.5350 | 19.32 | PC(20:5(6E,8Z,11Z,14Z,17Z)-OH(5)/P-16:0)   | [M+Na] <sup>+</sup> | 779.5465 | Oxidized Phosphatidylcholine       |
|          |       | PC(P-16:0/20:5(6E,8Z,11Z,14Z,17Z)-OH(5))   | [M+Na] <sup>+</sup> | 779.5465 | Oxidized Phosphatidylcholine       |
|          |       | PC(20:5(5Z,8Z,10E,14Z,17Z)-OH(12)/P-16:0)  | [M+Na] <sup>+</sup> | 779.5465 | Oxidized Phosphatidylcholine       |
|          |       | PC(P-16:0/20:5(5Z,8Z,10E,14Z,17Z)-OH(12))  | [M+Na] <sup>+</sup> | 779.5465 | Oxidized Phosphatidylcholine       |
|          |       | PC(20:5(5Z,8Z,11Z,14Z,16E)-OH(18)/P-16:0)  | [M+Na] <sup>+</sup> | 779.5465 | Oxidized Phosphatidylcholine       |
|          |       | PC(P-16:0/20:5(5Z,8Z,11Z,14Z,16E)-OH(18))  | [M+Na] <sup>+</sup> | 779.5465 | Oxidized Phosphatidylcholine       |
|          |       | PC(20:5(5Z,8Z,11Z,14Z,16E)-OH(18R)/P-16:0) | [M+Na] <sup>+</sup> | 779.5465 | Oxidized Phosphatidylcholine       |
|          |       | PC(P-16:0/20:5(5Z,8Z,11Z,14Z,16E)-OH(18R)) | [M+Na] <sup>+</sup> | 779.5465 | Oxidized Phosphatidylcholine       |
|          |       | PC(20:4(5Z,8Z,11Z,13E)+=O(15)/P-16:0)      | [M+Na] <sup>+</sup> | 779.5465 | Oxidized Phosphatidylcholine       |
|          |       | PC(P-16:0/20:4(5Z,8Z,11Z,13E)+=O(15))      | [M+Na] <sup>+</sup> | 779.5465 | Oxidized Phosphatidylcholine       |
|          |       | PC(20:4(6E,8Z,11Z,14Z)+=O(5)/P-16:0)       | [M+Na] <sup>+</sup> | 779.5465 | Oxidized Phosphatidylcholine       |
|          |       | PC(P-16:0/20:4(6E,8Z,11Z,14Z)+=O(5))       | [M+Na] <sup>+</sup> | 779.5465 | Oxidized Phosphatidylcholine       |
|          |       | PE-NMe(20:2(11Z,14Z)/18:3(6Z,9Z,12Z))      | [M+Na] <sup>+</sup> | 779.5465 | DimethylPhosphatidylethanolamine   |
|          |       | PE-NMe(20:2(11Z,14Z)/18:3(9Z,12Z,15Z))     | [M+Na] <sup>+</sup> | 779.5465 | DimethylPhosphatidylethanolamine   |
|          |       | PE-NMe(18:3(9Z,12Z,15Z)/20:2(11Z,14Z))     | [M+Na] <sup>+</sup> | 779.5465 | DimethylPhosphatidylethanolamine   |
|          |       | PE-NMe(18:3(6Z,9Z,12Z)/20:2(11Z,14Z))      | [M+Na] <sup>+</sup> | 779.5465 | DimethylPhosphatidylethanolamine   |
|          |       | PE-NMe2(22:5(7Z,10Z,13Z,16Z,19Z)/15:0)     | [M+Na] <sup>+</sup> | 779.5465 | DimethylPhosphatidylethanolamine   |
|          |       | PE-NMe2(22:5(4Z,7Z,10Z,13Z,16Z)/15:0)      | [M+Na] <sup>+</sup> | 779.5465 | DimethylPhosphatidylethanolamine   |
|          |       | PE-NMe2(15:0/22:5(7Z,10Z,13Z,16Z,19Z))     | [M+Na] <sup>+</sup> | 779.5465 | DimethylPhosphatidylethanolamine   |
|          |       | PE-NMe2(15:0/22:5(4Z,7Z,10Z,13Z,16Z))      | [M+Na] <sup>+</sup> | 779.5465 | DimethylPhosphatidylethanolamine   |
|          |       |                                            |                     |          | MonomethylPhosphatidylethanolamine |
|          |       | PE-NMe(22:5(7Z,10Z,13Z,16Z,19Z)/16:0)      | [M+Na] <sup>+</sup> | 779.5465 | ine                                |

|  |  |                                        |                     |          |                                    |
|--|--|----------------------------------------|---------------------|----------|------------------------------------|
|  |  | PE-NMe(22:5(4Z,7Z,10Z,13Z,16Z)/16:0)   | [M+Na] <sup>+</sup> | 779.5465 | MonomethylPhosphatidylethanolamine |
|  |  | PE-NMe(22:4(7Z,10Z,13Z,16Z)/16:1(9Z))  | [M+Na] <sup>+</sup> | 779.5465 | MonomethylPhosphatidylethanolamine |
|  |  | PE-NMe(20:5(5Z,8Z,11Z,14Z,17Z)/18:0)   | [M+Na] <sup>+</sup> | 779.5465 | MonomethylPhosphatidylethanolamine |
|  |  | PE-NMe(20:4(8Z,11Z,14Z,17Z)/18:1(9Z))  | [M+Na] <sup>+</sup> | 779.5465 | MonomethylPhosphatidylethanolamine |
|  |  | PE-NMe(20:4(8Z,11Z,14Z,17Z)/18:1(11Z)) | [M+Na] <sup>+</sup> | 779.5465 | MonomethylPhosphatidylethanolamine |
|  |  | PE-NMe(20:4(5Z,8Z,11Z,14Z)/18:1(9Z))   | [M+Na] <sup>+</sup> | 779.5465 | MonomethylPhosphatidylethanolamine |
|  |  | PE-NMe(20:4(5Z,8Z,11Z,14Z)/18:1(11Z))  | [M+Na] <sup>+</sup> | 779.5465 | MonomethylPhosphatidylethanolamine |
|  |  | PE-NMe(20:3(8Z,11Z,14Z)/18:2(9Z,12Z))  | [M+Na] <sup>+</sup> | 779.5465 | MonomethylPhosphatidylethanolamine |
|  |  | PE-NMe(20:3(5Z,8Z,11Z)/18:2(9Z,12Z))   | [M+Na] <sup>+</sup> | 779.5465 | MonomethylPhosphatidylethanolamine |
|  |  | PE-NMe(20:1(11Z)/18:4(6Z,9Z,12Z,15Z))  | [M+Na] <sup>+</sup> | 779.5465 | MonomethylPhosphatidylethanolamine |
|  |  | PE-NMe(18:4(6Z,9Z,12Z,15Z)/20:1(11Z))  | [M+Na] <sup>+</sup> | 779.5465 | MonomethylPhosphatidylethanolamine |
|  |  | PE-NMe(18:2(9Z,12Z)/20:3(8Z,11Z,14Z))  | [M+Na] <sup>+</sup> | 779.5465 | MonomethylPhosphatidylethanolamine |
|  |  | PE-NMe(18:2(9Z,12Z)/20:3(5Z,8Z,11Z))   | [M+Na] <sup>+</sup> | 779.5465 | MonomethylPhosphatidylethanolamine |
|  |  | PE-NMe(18:1(9Z)/20:4(8Z,11Z,14Z,17Z))  | [M+Na] <sup>+</sup> | 779.5465 | MonomethylPhosphatidylethanolamine |
|  |  | PE-NMe(18:1(9Z)/20:4(5Z,8Z,11Z,14Z))   | [M+Na] <sup>+</sup> | 779.5465 | MonomethylPhosphatidylethanolamine |

|  |  |                                                   |                     |          |                                    |
|--|--|---------------------------------------------------|---------------------|----------|------------------------------------|
|  |  | PE-NMe(18:1(11Z)/20:4(5Z,8Z,11Z,14Z))             | [M+Na] <sup>+</sup> | 779.5465 | MonomethylPhosphatidylethanolamine |
|  |  | PE-NMe(18:1(11Z)/20:4(8Z,11Z,14Z,17Z))            | [M+Na] <sup>+</sup> | 779.5465 | MonomethylPhosphatidylethanolamine |
|  |  | PE-NMe(18:0/20:5(5Z,8Z,11Z,14Z,17Z))              | [M+Na] <sup>+</sup> | 779.5465 | MonomethylPhosphatidylethanolamine |
|  |  | PE-NMe(16:1(9Z)/22:4(7Z,10Z,13Z,16Z))             | [M+Na] <sup>+</sup> | 779.5465 | MonomethylPhosphatidylethanolamine |
|  |  | PE-NMe(16:0/22:5(7Z,10Z,13Z,16Z,19Z))             | [M+Na] <sup>+</sup> | 779.5465 | MonomethylPhosphatidylethanolamine |
|  |  | PE-NMe(16:0/22:5(4Z,7Z,10Z,13Z,16Z))              | [M+Na] <sup>+</sup> | 779.5465 | MonomethylPhosphatidylethanolamine |
|  |  | PE-NMe(22:6(4Z,7Z,10Z,13Z,16Z,19Z)/18:2(9Z,12Z))  | [M+H] <sup>+</sup>  | 801.5309 | MonomethylPhosphatidylethanolamine |
|  |  | PE-NMe(22:5(7Z,10Z,13Z,16Z,19Z)/18:3(6Z,9Z,12Z))  | [M+H] <sup>+</sup>  | 801.5309 | MonomethylPhosphatidylethanolamine |
|  |  | PE-NMe(22:5(7Z,10Z,13Z,16Z,19Z)/18:3(9Z,12Z,15Z)) | [M+H] <sup>+</sup>  | 801.5309 | MonomethylPhosphatidylethanolamine |
|  |  | PE-NMe(22:5(4Z,7Z,10Z,13Z,16Z)/18:3(9Z,12Z,15Z))  | [M+H] <sup>+</sup>  | 801.5309 | MonomethylPhosphatidylethanolamine |
|  |  | PE-NMe(22:5(4Z,7Z,10Z,13Z,16Z)/18:3(6Z,9Z,12Z))   | [M+H] <sup>+</sup>  | 801.5309 | MonomethylPhosphatidylethanolamine |
|  |  | PE-NMe(22:4(7Z,10Z,13Z,16Z)/18:4(6Z,9Z,12Z,15Z))  | [M+H] <sup>+</sup>  | 801.5309 | MonomethylPhosphatidylethanolamine |



|  |                                                   |                    |          |                                    |
|--|---------------------------------------------------|--------------------|----------|------------------------------------|
|  | PE-NMe(20:5(5Z,8Z,11Z,14Z,17Z)/20:3(8Z,11Z,14Z))  | [M+H] <sup>+</sup> | 801.5309 | MonomethylPhosphatidylethanolamine |
|  | PE-NMe(20:5(5Z,8Z,11Z,14Z,17Z)/20:3(5Z,8Z,11Z))   | [M+H] <sup>+</sup> | 801.5309 | MonomethylPhosphatidylethanolamine |
|  | PE-NMe(20:4(8Z,11Z,14Z,17Z)/20:4(5Z,8Z,11Z,14Z))  | [M+H] <sup>+</sup> | 801.5309 | MonomethylPhosphatidylethanolamine |
|  | PE-NMe(20:4(8Z,11Z,14Z,17Z)/20:4(8Z,11Z,14Z,17Z)) | [M+H] <sup>+</sup> | 801.5309 | MonomethylPhosphatidylethanolamine |
|  | PE-NMe(20:4(5Z,8Z,11Z,14Z)/20:4(8Z,11Z,14Z,17Z))  | [M+H] <sup>+</sup> | 801.5309 | MonomethylPhosphatidylethanolamine |
|  | PE-NMe(20:3(8Z,11Z,14Z)/20:5(5Z,8Z,11Z,14Z,17Z))  | [M+H] <sup>+</sup> | 801.5309 | MonomethylPhosphatidylethanolamine |
|  | PE-NMe(20:3(5Z,8Z,11Z)/20:5(5Z,8Z,11Z,14Z,17Z))   | [M+H] <sup>+</sup> | 801.5309 | MonomethylPhosphatidylethanolamine |
|  | PE-NMe(18:4(6Z,9Z,12Z,15Z)/22:4(7Z,10Z,13Z,16Z))  | [M+H] <sup>+</sup> | 801.5309 | MonomethylPhosphatidylethanolamine |
|  | PE-NMe(18:3(9Z,12Z,15Z)/22:5(7Z,10Z,13Z,16Z,19Z)) | [M+H] <sup>+</sup> | 801.5309 | MonomethylPhosphatidylethanolamine |
|  | PE-NMe(18:3(9Z,12Z,15Z)/22:5(4Z,7Z,10Z,13Z,16Z))  | [M+H] <sup>+</sup> | 801.5309 | MonomethylPhosphatidylethanolamine |

|  |                                                  |                     |          |                                    |
|--|--------------------------------------------------|---------------------|----------|------------------------------------|
|  | PE-NMe(18:3(6Z,9Z,12Z)/22:5(4Z,7Z,10Z,13Z,16Z))  | [M+H] <sup>+</sup>  | 801.5309 | MonomethylPhosphatidylethanolamine |
|  | PE-NMe(18:3(6Z,9Z,12Z)/22:5(7Z,10Z,13Z,16Z,19Z)) | [M+H] <sup>+</sup>  | 801.5309 | MonomethylPhosphatidylethanolamine |
|  | PE-NMe(18:2(9Z,12Z)/22:6(4Z,7Z,10Z,13Z,16Z,19Z)) | [M+H] <sup>+</sup>  | 801.5309 | MonomethylPhosphatidylethanolamine |
|  | PE-NMe(20:4(5Z,8Z,11Z,14Z)/20:4(5Z,8Z,11Z,14Z))  | [M+H] <sup>+</sup>  | 801.5309 | MonomethylPhosphatidylethanolamine |
|  | PC(22:5(7Z,10Z,13Z,16Z,19Z)/14:0)                | [M+Na] <sup>+</sup> | 779.5465 | Phosphatidylcholine                |
|  | PC(22:5(4Z,7Z,10Z,13Z,16Z)/14:0)                 | [M+Na] <sup>+</sup> | 779.5465 | Phosphatidylcholine                |
|  | PC(22:4(7Z,10Z,13Z,16Z)/14:1(9Z))                | [M+Na] <sup>+</sup> | 779.5465 | Phosphatidylcholine                |
|  | PC(20:5(5Z,8Z,11Z,14Z,17Z)/18:3(9Z,12Z,15Z))     | [M+H] <sup>+</sup>  | 801.5309 | Phosphatidylcholine                |
|  | PC(20:5(5Z,8Z,11Z,14Z,17Z)/18:3(6Z,9Z,12Z))      | [M+H] <sup>+</sup>  | 801.5309 | Phosphatidylcholine                |
|  | PC(20:5(5Z,8Z,11Z,14Z,17Z)/16:0)                 | [M+Na] <sup>+</sup> | 779.5465 | Phosphatidylcholine                |
|  | PC(20:4(8Z,11Z,14Z,17Z)/18:4(6Z,9Z,12Z,15Z))     | [M+H] <sup>+</sup>  | 801.5309 | Phosphatidylcholine                |
|  | PC(20:4(8Z,11Z,14Z,17Z)/16:1(9Z))                | [M+Na] <sup>+</sup> | 779.5465 | Phosphatidylcholine                |
|  | PC(20:4(5Z,8Z,11Z,14Z)/18:4(6Z,9Z,12Z,15Z))      | [M+H] <sup>+</sup>  | 801.5309 | Phosphatidylcholine                |
|  | PC(20:4(5Z,8Z,11Z,14Z)/16:1(9Z))                 | [M+Na] <sup>+</sup> | 779.5465 | Phosphatidylcholine                |
|  | PC(18:4(6Z,9Z,12Z,15Z)/20:4(8Z,11Z,14Z,17Z))     | [M+H] <sup>+</sup>  | 801.5309 | Phosphatidylcholine                |
|  | PC(18:4(6Z,9Z,12Z,15Z)/20:4(5Z,8Z,11Z,14Z))      | [M+H] <sup>+</sup>  | 801.5309 | Phosphatidylcholine                |
|  | PC(18:4(6Z,9Z,12Z,15Z)/18:1(11Z))                | [M+Na] <sup>+</sup> | 779.5465 | Phosphatidylcholine                |
|  | PC(18:4(6Z,9Z,12Z,15Z)/18:1(9Z))                 | [M+Na] <sup>+</sup> | 779.5465 | Phosphatidylcholine                |
|  | PC(18:3(9Z,12Z,15Z)/20:5(5Z,8Z,11Z,14Z,17Z))     | [M+H] <sup>+</sup>  | 801.5309 | Phosphatidylcholine                |
|  | PC(18:3(9Z,12Z,15Z)/18:2(9Z,12Z))                | [M+Na] <sup>+</sup> | 779.5465 | Phosphatidylcholine                |
|  | PC(18:3(6Z,9Z,12Z)/20:5(5Z,8Z,11Z,14Z,17Z))      | [M+H] <sup>+</sup>  | 801.5309 | Phosphatidylcholine                |
|  | PC(18:3(6Z,9Z,12Z)/18:2(9Z,12Z))                 | [M+Na] <sup>+</sup> | 779.5465 | Phosphatidylcholine                |

|           |       |                                              |                                   |          |                                                                     |
|-----------|-------|----------------------------------------------|-----------------------------------|----------|---------------------------------------------------------------------|
|           |       | PC(18:2(9Z,12Z)/18:3(9Z,12Z,15Z))            | [M+Na] <sup>+</sup>               | 779.5465 | Phosphatidylcholine                                                 |
|           |       | PC(18:2(9Z,12Z)/18:3(6Z,9Z,12Z))             | [M+Na] <sup>+</sup>               | 779.5465 | Phosphatidylcholine                                                 |
|           |       | PC(18:1(9Z)/18:4(6Z,9Z,12Z,15Z))             | [M+Na] <sup>+</sup>               | 779.5465 | Phosphatidylcholine                                                 |
|           |       | PC(18:1(11Z)/18:4(6Z,9Z,12Z,15Z))            | [M+Na] <sup>+</sup>               | 779.5465 | Phosphatidylcholine                                                 |
|           |       | PC(16:1(9Z)/20:4(8Z,11Z,14Z,17Z))            | [M+Na] <sup>+</sup>               | 779.5465 | Phosphatidylcholine                                                 |
|           |       | PC(16:1(9Z)/20:4(5Z,8Z,11Z,14Z))             | [M+Na] <sup>+</sup>               | 779.5465 | Phosphatidylcholine                                                 |
|           |       | PC(16:0/20:5(5Z,8Z,11Z,14Z,17Z))             | [M+Na] <sup>+</sup>               | 779.5465 | Phosphatidylcholine                                                 |
|           |       | PC(14:1(9Z)/22:4(7Z,10Z,13Z,16Z))            | [M+Na] <sup>+</sup>               | 779.5465 | Phosphatidylcholine                                                 |
|           |       | PC(14:0/22:5(7Z,10Z,13Z,16Z,19Z))            | [M+Na] <sup>+</sup>               | 779.5465 | Phosphatidylcholine                                                 |
|           |       | PC(14:0/22:5(4Z,7Z,10Z,13Z,16Z))             | [M+Na] <sup>+</sup>               | 779.5465 | Phosphatidylcholine                                                 |
| 496.3397  | 12.95 | LysoPC(0:0/16:0)                             | [M+H] <sup>+</sup>                | 495.3325 | LysoPhosphatidylcholine                                             |
|           |       | 1-PalmitoylPhosphatidylcholine               | [M+H] <sup>+</sup>                | 495.3325 | PalmitoylPhosphatidylcholine                                        |
|           |       | 23-Acetoxysoladulcidine                      | [M+Na] <sup>+</sup>               | 473.3505 | Steroidal alkaloid                                                  |
|           |       | LysoPC(16:0/0:0)                             | [M+H] <sup>+</sup>                | 495.3325 | LysoPhosphatidylcholine                                             |
|           |       | Clupanodonyl carnitine                       | [M+Na] <sup>+</sup>               | 473.3505 | Acylcarnitine                                                       |
|           |       | Docosa-4,7,10,13,16-pentaenoyl carnitine     | [M+Na] <sup>+</sup>               | 473.3505 | Acylcarnitine                                                       |
| 544.3373  | 13.35 | LysoPC(0:0/20:4(5Z,8Z,11Z,14Z))              | [M+H] <sup>+</sup>                | 543.3325 | LysoPhosphatidylcholine                                             |
|           |       | LysoPC(0:0/18:1(9Z))                         | [M+Na] <sup>+</sup>               | 521.3481 | LysoPhosphatidylcholine                                             |
|           |       | LysoPC(20:4(8Z,11Z,14Z,17Z)/0:0)             | [M+H] <sup>+</sup>                | 543.3325 | LysoPhosphatidylcholine                                             |
|           |       | LysoPC(20:4(5Z,8Z,11Z,14Z)/0:0)              | [M+H] <sup>+</sup>                | 543.3325 | LysoPhosphatidylcholine                                             |
|           |       | LysoPC(18:1(11Z)/0:0)                        | [M+Na] <sup>+</sup>               | 521.3481 | LysoPhosphatidylcholine                                             |
|           |       | LysoPC(18:1(9Z)/0:0)                         | [M+Na] <sup>+</sup>               | 521.3481 | LysoPhosphatidylcholine                                             |
| 518.3215  | 12.95 | LysoPC(0:0/16:0)                             | [M+Na] <sup>+</sup>               | 495.3325 | LysoPhosphatidylcholine                                             |
|           |       | 1-PalmitoylPhosphatidylcholine               | [M+Na] <sup>+</sup>               | 495.3325 | PalmitoylPhosphatidylcholine                                        |
|           |       | LysoPC(16:0/0:0)                             | [M+Na] <sup>+</sup>               | 495.3325 | LysoPhosphatidylcholine                                             |
| 351.2504  | 12.67 | MG(16:1(9Z)/0:0/0:0)                         | [M+Na] <sup>+</sup>               | 328.2614 | Monoacylglyceride                                                   |
|           |       | MG(0:0/16:1(9Z)/0:0)                         | [M+Na] <sup>+</sup>               | 328.2614 | Monoacylglyceride                                                   |
| 384.3833* | 13.74 | Nervonic acid                                | [M+NH <sub>4</sub> ] <sup>+</sup> | 366.3498 | Long chain unsaturated fatty acid that is enriched in sphingomyelin |
| 828.5507  | 19.67 | PC(20:5(6E,8Z,11Z,14Z,17Z)-OH(5)/P-18:1(9Z)) | [M+Na] <sup>+</sup>               | 805.5622 | Oxidized Phosphatidylcholine                                        |

|  |  |                                                |                     |          |                              |
|--|--|------------------------------------------------|---------------------|----------|------------------------------|
|  |  | PC(P-18:1(9Z)/20:5(6E,8Z,11Z,14Z,17Z)-OH(5))   | [M+Na] <sup>+</sup> | 805.5622 | Oxidized Phosphatidylcholine |
|  |  | PC(20:5(5Z,8Z,10E,14Z,17Z)-OH(12)/P-18:1(9Z))  | [M+Na] <sup>+</sup> | 805.5622 | Oxidized Phosphatidylcholine |
|  |  | PC(P-18:1(9Z)/20:5(5Z,8Z,10E,14Z,17Z)-OH(12))  | [M+Na] <sup>+</sup> | 805.5622 | Oxidized Phosphatidylcholine |
|  |  | PC(20:5(5Z,8Z,11Z,14Z,16E)-OH(18)/P-18:1(9Z))  | [M+Na] <sup>+</sup> | 805.5622 | Oxidized Phosphatidylcholine |
|  |  | PC(P-18:1(9Z)/20:5(5Z,8Z,11Z,14Z,16E)-OH(18))  | [M+Na] <sup>+</sup> | 805.5622 | Oxidized Phosphatidylcholine |
|  |  | PC(20:5(5Z,8Z,11Z,14Z,16E)-OH(18R)/P-18:1(9Z)) | [M+Na] <sup>+</sup> | 805.5622 | Oxidized Phosphatidylcholine |
|  |  | PC(P-18:1(9Z)/20:5(5Z,8Z,11Z,14Z,16E)-OH(18R)) | [M+Na] <sup>+</sup> | 805.5622 | Oxidized Phosphatidylcholine |
|  |  | PC(20:4(5Z,8Z,11Z,13E)+=O(15)/P-18:1(9Z))      | [M+Na] <sup>+</sup> | 805.5622 | Oxidized Phosphatidylcholine |
|  |  | PC(P-18:1(9Z)/20:4(5Z,8Z,11Z,13E)+=O(15))      | [M+Na] <sup>+</sup> | 805.5622 | Oxidized Phosphatidylcholine |
|  |  | PC(20:4(6E,8Z,11Z,14Z)+=O(5)/P-18:1(9Z))       | [M+Na] <sup>+</sup> | 805.5622 | Oxidized Phosphatidylcholine |
|  |  | PC(P-18:1(9Z)/20:4(6E,8Z,11Z,14Z)+=O(5))       | [M+Na] <sup>+</sup> | 805.5622 | Oxidized Phosphatidylcholine |
|  |  | PC(20:5(6E,8Z,11Z,14Z,17Z)-OH(5)/P-18:1(11Z))  | [M+Na] <sup>+</sup> | 805.5622 | Oxidized Phosphatidylcholine |
|  |  | PC(P-18:1(11Z)/20:5(6E,8Z,11Z,14Z,17Z)-OH(5))  | [M+Na] <sup>+</sup> | 805.5622 | Oxidized Phosphatidylcholine |
|  |  | PC(20:5(5Z,8Z,10E,14Z,17Z)-OH(12)/P-18:1(11Z)) | [M+Na] <sup>+</sup> | 805.5622 | Oxidized Phosphatidylcholine |
|  |  | PC(P-18:1(11Z)/20:5(5Z,8Z,10E,14Z,17Z)-OH(12)) | [M+Na] <sup>+</sup> | 805.5622 | Oxidized Phosphatidylcholine |
|  |  | PC(20:5(5Z,8Z,11Z,14Z,16E)-OH(18)/P-18:1(11Z)) | [M+Na] <sup>+</sup> | 805.5622 | Oxidized Phosphatidylcholine |
|  |  | PC(P-18:1(11Z)/20:5(5Z,8Z,11Z,14Z,16E)-OH(18)) | [M+Na] <sup>+</sup> | 805.5622 | Oxidized Phosphatidylcholine |

|  |                                                 |                     |          |                                    |
|--|-------------------------------------------------|---------------------|----------|------------------------------------|
|  | PC(20:5(5Z,8Z,11Z,14Z,16E)-OH(18R)/P-18:1(11Z)) | [M+Na] <sup>+</sup> | 805.5622 | Oxidized Phosphatidylcholine       |
|  | PC(P-18:1(11Z)/20:5(5Z,8Z,11Z,14Z,16E)-OH(18R)) | [M+Na] <sup>+</sup> | 805.5622 | Oxidized Phosphatidylcholine       |
|  | PC(20:4(5Z,8Z,11Z,13E)+=O(15)/P-18:1(11Z))      | [M+Na] <sup>+</sup> | 805.5622 | Oxidized Phosphatidylcholine       |
|  | PC(P-18:1(11Z)/20:4(5Z,8Z,11Z,13E)+=O(15))      | [M+Na] <sup>+</sup> | 805.5622 | Oxidized Phosphatidylcholine       |
|  | PC(20:4(6E,8Z,11Z,14Z)+=O(5)/P-18:1(11Z))       | [M+Na] <sup>+</sup> | 805.5622 | Oxidized Phosphatidylcholine       |
|  | PC(P-18:1(11Z)/20:4(6E,8Z,11Z,14Z)+=O(5))       | [M+Na] <sup>+</sup> | 805.5622 | Oxidized Phosphatidylcholine       |
|  | PC(22:5(4Z,7Z,10Z,13Z,19Z)-O(16,17)/P-16:0)     | [M+Na] <sup>+</sup> | 805.5622 | Oxidized Phosphatidylcholine       |
|  | PC(P-16:0/22:5(4Z,7Z,10Z,13Z,19Z)-O(16,17))     | [M+Na] <sup>+</sup> | 805.5622 | Oxidized Phosphatidylcholine       |
|  | PC(22:6(4Z,7Z,10Z,13E,15E,19Z)-OH(17)/P-16:0)   | [M+Na] <sup>+</sup> | 805.5622 | Oxidized Phosphatidylcholine       |
|  | PC(P-16:0/22:6(4Z,7Z,10Z,13E,15E,19Z)-OH(17))   | [M+Na] <sup>+</sup> | 805.5622 | Oxidized Phosphatidylcholine       |
|  | PC(22:6(4Z,7Z,10Z,12E,16Z,19Z)-OH(14)/P-16:0)   | [M+Na] <sup>+</sup> | 805.5622 | Oxidized Phosphatidylcholine       |
|  | PC(P-16:0/22:6(4Z,7Z,10Z,12E,16Z,19Z)-OH(14))   | [M+Na] <sup>+</sup> | 805.5622 | Oxidized Phosphatidylcholine       |
|  | PC(22:6(4Z,8Z,10Z,13Z,16Z,19Z)-OH(7)/P-16:0)    | [M+Na] <sup>+</sup> | 805.5622 | Oxidized Phosphatidylcholine       |
|  | PC(P-16:0/22:6(4Z,8Z,10Z,13Z,16Z,19Z)-OH(7))    | [M+Na] <sup>+</sup> | 805.5622 | Oxidized Phosphatidylcholine       |
|  | PC(22:6(5Z,7Z,10Z,13Z,16Z,19Z)-OH(4)/P-16:0)    | [M+Na] <sup>+</sup> | 805.5622 | Oxidized Phosphatidylcholine       |
|  | PC(P-16:0/22:6(5Z,7Z,10Z,13Z,16Z,19Z)-OH(4))    | [M+Na] <sup>+</sup> | 805.5622 | Oxidized Phosphatidylcholine       |
|  | PE-NMe(20:4(8Z,11Z,14Z,17Z)/20:2(11Z,14Z))      | [M+Na] <sup>+</sup> | 805.5622 | MonomethylPhosphatidylethanolamine |
|  | PE-NMe(20:4(5Z,8Z,11Z,14Z)/20:2(11Z,14Z))       | [M+Na] <sup>+</sup> | 805.5622 | MonomethylPhosphatidylethanolamine |
|  | PE-NMe(20:2(11Z,14Z)/20:4(8Z,11Z,14Z,17Z))      | [M+Na] <sup>+</sup> | 805.5622 | MonomethylPhosphatidylethanolamine |
|  | PE-NMe(20:2(11Z,14Z)/20:4(5Z,8Z,11Z,14Z))       | [M+Na] <sup>+</sup> | 805.5622 | MonomethylPhosphatidylethanolamine |

|  |  |                                            |                     |          |                                    |
|--|--|--------------------------------------------|---------------------|----------|------------------------------------|
|  |  | PE-NMe(22:6(4Z,7Z,10Z,13Z,16Z,19Z)/18:0)   | [M+Na] <sup>+</sup> | 805.5622 | MonomethylPhosphatidylethanolamine |
|  |  | PE-NMe(22:5(7Z,10Z,13Z,16Z,19Z)/18:1(11Z)) | [M+Na] <sup>+</sup> | 805.5622 | MonomethylPhosphatidylethanolamine |
|  |  | PE-NMe(22:5(7Z,10Z,13Z,16Z,19Z)/18:1(9Z))  | [M+Na] <sup>+</sup> | 805.5622 | MonomethylPhosphatidylethanolamine |
|  |  | PE-NMe(22:5(4Z,7Z,10Z,13Z,16Z)/18:1(9Z))   | [M+Na] <sup>+</sup> | 805.5622 | MonomethylPhosphatidylethanolamine |
|  |  | PE-NMe(22:5(4Z,7Z,10Z,13Z,16Z)/18:1(11Z))  | [M+Na] <sup>+</sup> | 805.5622 | MonomethylPhosphatidylethanolamine |
|  |  | PE-NMe(22:4(7Z,10Z,13Z,16Z)/18:2(9Z,12Z))  | [M+Na] <sup>+</sup> | 805.5622 | MonomethylPhosphatidylethanolamine |
|  |  | PE-NMe(22:2(13Z,16Z)/18:4(6Z,9Z,12Z,15Z))  | [M+Na] <sup>+</sup> | 805.5622 | MonomethylPhosphatidylethanolamine |
|  |  | PE-NMe(20:5(5Z,8Z,11Z,14Z,17Z)/20:1(11Z))  | [M+Na] <sup>+</sup> | 805.5622 | MonomethylPhosphatidylethanolamine |
|  |  | PE-NMe(20:3(8Z,11Z,14Z)/20:3(8Z,11Z,14Z))  | [M+Na] <sup>+</sup> | 805.5622 | MonomethylPhosphatidylethanolamine |
|  |  | PE-NMe(20:3(8Z,11Z,14Z)/20:3(5Z,8Z,11Z))   | [M+Na] <sup>+</sup> | 805.5622 | MonomethylPhosphatidylethanolamine |
|  |  | PE-NMe(20:3(5Z,8Z,11Z)/20:3(8Z,11Z,14Z))   | [M+Na] <sup>+</sup> | 805.5622 | MonomethylPhosphatidylethanolamine |
|  |  | PE-NMe(20:3(5Z,8Z,11Z)/20:3(5Z,8Z,11Z))    | [M+Na] <sup>+</sup> | 805.5622 | MonomethylPhosphatidylethanolamine |
|  |  | PE-NMe(20:1(11Z)/20:5(5Z,8Z,11Z,14Z,17Z))  | [M+Na] <sup>+</sup> | 805.5622 | MonomethylPhosphatidylethanolamine |
|  |  | PE-NMe(18:4(6Z,9Z,12Z,15Z)/22:2(13Z,16Z))  | [M+Na] <sup>+</sup> | 805.5622 | MonomethylPhosphatidylethanolamine |
|  |  | PE-NMe(18:2(9Z,12Z)/22:4(7Z,10Z,13Z,16Z))  | [M+Na] <sup>+</sup> | 805.5622 | MonomethylPhosphatidylethanolamine |

|  |  |                                                       |                     |          |                                    |
|--|--|-------------------------------------------------------|---------------------|----------|------------------------------------|
|  |  | PE-NMe(18:1(9Z)/22:5(7Z,10Z,13Z,16Z,19Z))             | [M+Na] <sup>+</sup> | 805.5622 | MonomethylPhosphatidylethanolamine |
|  |  | PE-NMe(18:1(9Z)/22:5(4Z,7Z,10Z,13Z,16Z))              | [M+Na] <sup>+</sup> | 805.5622 | MonomethylPhosphatidylethanolamine |
|  |  | PE-NMe(18:1(11Z)/22:5(4Z,7Z,10Z,13Z,16Z))             | [M+Na] <sup>+</sup> | 805.5622 | MonomethylPhosphatidylethanolamine |
|  |  | PE-NMe(18:1(11Z)/22:5(7Z,10Z,13Z,16Z,19Z))            | [M+Na] <sup>+</sup> | 805.5622 | MonomethylPhosphatidylethanolamine |
|  |  | PE-NMe(18:0/22:6(4Z,7Z,10Z,13Z,16Z,19Z))              | [M+Na] <sup>+</sup> | 805.5622 | MonomethylPhosphatidylethanolamine |
|  |  | PE-NMe(22:6(4Z,7Z,10Z,13Z,16Z,19Z)/20:3(5Z,8Z,11Z))   | [M+H] <sup>+</sup>  | 827.5465 | MonomethylPhosphatidylethanolamine |
|  |  | PE-NMe(22:6(4Z,7Z,10Z,13Z,16Z,19Z)/20:3(8Z,11Z,14Z))  | [M+H] <sup>+</sup>  | 827.5465 | MonomethylPhosphatidylethanolamine |
|  |  | PE-NMe(22:5(7Z,10Z,13Z,16Z,19Z)/20:4(8Z,11Z,14Z,17Z)) | [M+H] <sup>+</sup>  | 827.5465 | MonomethylPhosphatidylethanolamine |
|  |  | PE-NMe(22:5(7Z,10Z,13Z,16Z,19Z)/20:4(5Z,8Z,11Z,14Z))  | [M+H] <sup>+</sup>  | 827.5465 | MonomethylPhosphatidylethanolamine |
|  |  | PE-NMe(22:5(4Z,7Z,10Z,13Z,16Z)/20:4(8Z,11Z,14Z,17Z))  | [M+H] <sup>+</sup>  | 827.5465 | MonomethylPhosphatidylethanolamine |
|  |  | PE-NMe(22:5(4Z,7Z,10Z,13Z,16Z)/20:4(5Z,8Z,11Z,14Z))   | [M+H] <sup>+</sup>  | 827.5465 | MonomethylPhosphatidylethanolamine |
|  |  | PE-NMe(22:4(7Z,10Z,13Z,16Z)/20:5(5Z,8Z,11Z,14Z,17Z))  | [M+H] <sup>+</sup>  | 827.5465 | MonomethylPhosphatidylethanolamine |

|  |                                                       |                     |          |                                    |
|--|-------------------------------------------------------|---------------------|----------|------------------------------------|
|  | PE-NMe(20:5(5Z,8Z,11Z,14Z,17Z)/22:4(7Z,10Z,13Z,16Z))  | [M+H] <sup>+</sup>  | 827.5465 | MonomethylPhosphatidylethanolamine |
|  | PE-NMe(20:4(8Z,11Z,14Z,17Z)/22:5(7Z,10Z,13Z,16Z,19Z)) | [M+H] <sup>+</sup>  | 827.5465 | MonomethylPhosphatidylethanolamine |
|  | PE-NMe(20:4(8Z,11Z,14Z,17Z)/22:5(4Z,7Z,10Z,13Z,16Z))  | [M+H] <sup>+</sup>  | 827.5465 | MonomethylPhosphatidylethanolamine |
|  | PE-NMe(20:4(5Z,8Z,11Z,14Z)/22:5(4Z,7Z,10Z,13Z,16Z))   | [M+H] <sup>+</sup>  | 827.5465 | MonomethylPhosphatidylethanolamine |
|  | PE-NMe(20:4(5Z,8Z,11Z,14Z)/22:5(7Z,10Z,13Z,16Z,19Z))  | [M+H] <sup>+</sup>  | 827.5465 | MonomethylPhosphatidylethanolamine |
|  | PE-NMe(20:3(8Z,11Z,14Z)/22:6(4Z,7Z,10Z,13Z,16Z,19Z))  | [M+H] <sup>+</sup>  | 827.5465 | MonomethylPhosphatidylethanolamine |
|  | PE-NMe(20:3(5Z,8Z,11Z)/22:6(4Z,7Z,10Z,13Z,16Z,19Z))   | [M+H] <sup>+</sup>  | 827.5465 | MonomethylPhosphatidylethanolamine |
|  | PC(22:6(4Z,7Z,10Z,13Z,16Z,19Z)/18:3(9Z,12Z,15Z))      | [M+H] <sup>+</sup>  | 827.5465 | Phosphatidylcholine                |
|  | PC(22:6(4Z,7Z,10Z,13Z,16Z,19Z)/18:3(6Z,9Z,12Z))       | [M+H] <sup>+</sup>  | 827.5465 | Phosphatidylcholine                |
|  | PC(22:6(4Z,7Z,10Z,13Z,16Z,19Z)/16:0)                  | [M+Na] <sup>+</sup> | 805.5622 | Phosphatidylcholine                |
|  | PC(22:5(7Z,10Z,13Z,16Z,19Z)/18:4(6Z,9Z,12Z,15Z))      | [M+H] <sup>+</sup>  | 827.5465 | Phosphatidylcholine                |
|  | PC(22:5(7Z,10Z,13Z,16Z,19Z)/16:1(9Z))                 | [M+Na] <sup>+</sup> | 805.5622 | Phosphatidylcholine                |
|  | PC(22:5(4Z,7Z,10Z,13Z,16Z)/18:4(6Z,9Z,12Z,15Z))       | [M+H] <sup>+</sup>  | 827.5465 | Phosphatidylcholine                |



|  |                                                  |                     |          |                     |
|--|--------------------------------------------------|---------------------|----------|---------------------|
|  | PC(22:5(4Z,7Z,10Z,13Z,16Z)/16:1(9Z))             | [M+Na] <sup>+</sup> | 805.5622 | Phosphatidylcholine |
|  | PC(20:5(5Z,8Z,11Z,14Z,17Z)/20:4(5Z,8Z,11Z,14Z))  | [M+H] <sup>+</sup>  | 827.5465 | Phosphatidylcholine |
|  | PC(20:5(5Z,8Z,11Z,14Z,17Z)/20:4(8Z,11Z,14Z,17Z)) | [M+H] <sup>+</sup>  | 827.5465 | Phosphatidylcholine |
|  | PC(20:5(5Z,8Z,11Z,14Z,17Z)/18:1(11Z))            | [M+Na] <sup>+</sup> | 805.5622 | Phosphatidylcholine |
|  | PC(20:5(5Z,8Z,11Z,14Z,17Z)/18:1(9Z))             | [M+Na] <sup>+</sup> | 805.5622 | Phosphatidylcholine |
|  | PC(20:4(8Z,11Z,14Z,17Z)/20:5(5Z,8Z,11Z,14Z,17Z)) | [M+H] <sup>+</sup>  | 827.5465 | Phosphatidylcholine |
|  | PC(20:4(8Z,11Z,14Z,17Z)/18:2(9Z,12Z))            | [M+Na] <sup>+</sup> | 805.5622 | Phosphatidylcholine |
|  | PC(20:4(5Z,8Z,11Z,14Z)/20:5(5Z,8Z,11Z,14Z,17Z))  | [M+H] <sup>+</sup>  | 827.5465 | Phosphatidylcholine |
|  | PC(20:4(5Z,8Z,11Z,14Z)/18:2(9Z,12Z))             | [M+Na] <sup>+</sup> | 805.5622 | Phosphatidylcholine |
|  | PC(20:3(8Z,11Z,14Z)/18:3(9Z,12Z,15Z))            | [M+Na] <sup>+</sup> | 805.5622 | Phosphatidylcholine |
|  | PC(20:3(8Z,11Z,14Z)/18:3(6Z,9Z,12Z))             | [M+Na] <sup>+</sup> | 805.5622 | Phosphatidylcholine |
|  | PC(20:3(5Z,8Z,11Z)/18:3(6Z,9Z,12Z))              | [M+Na] <sup>+</sup> | 805.5622 | Phosphatidylcholine |
|  | PC(20:3(5Z,8Z,11Z)/18:3(9Z,12Z,15Z))             | [M+Na] <sup>+</sup> | 805.5622 | Phosphatidylcholine |
|  | PC(20:2(11Z,14Z)/18:4(6Z,9Z,12Z,15Z))            | [M+Na] <sup>+</sup> | 805.5622 | Phosphatidylcholine |
|  | PC(18:4(6Z,9Z,12Z,15Z)/22:5(4Z,7Z,10Z,13Z,16Z))  | [M+H] <sup>+</sup>  | 827.5465 | Phosphatidylcholine |
|  | PC(18:4(6Z,9Z,12Z,15Z)/22:5(7Z,10Z,13Z,16Z,19Z)) | [M+H] <sup>+</sup>  | 827.5465 | Phosphatidylcholine |
|  | PC(18:4(6Z,9Z,12Z,15Z)/20:2(11Z,14Z))            | [M+Na] <sup>+</sup> | 805.5622 | Phosphatidylcholine |
|  | PC(18:3(9Z,12Z,15Z)/22:6(4Z,7Z,10Z,13Z,16Z,19Z)) | [M+H] <sup>+</sup>  | 827.5465 | Phosphatidylcholine |
|  | PC(18:3(9Z,12Z,15Z)/20:3(5Z,8Z,11Z))             | [M+Na] <sup>+</sup> | 805.5622 | Phosphatidylcholine |
|  | PC(18:3(9Z,12Z,15Z)/20:3(8Z,11Z,14Z))            | [M+Na] <sup>+</sup> | 805.5622 | Phosphatidylcholine |
|  | PC(18:3(6Z,9Z,12Z)/22:6(4Z,7Z,10Z,13Z,16Z,19Z))  | [M+H] <sup>+</sup>  | 827.5465 | Phosphatidylcholine |
|  | PC(18:3(6Z,9Z,12Z)/20:3(5Z,8Z,11Z))              | [M+Na] <sup>+</sup> | 805.5622 | Phosphatidylcholine |

|          |       |                                                  |                                   |          |                                                                                                             |
|----------|-------|--------------------------------------------------|-----------------------------------|----------|-------------------------------------------------------------------------------------------------------------|
|          |       | PC(18:3(6Z,9Z,12Z)/20:3(8Z,11Z,14Z))             | [M+Na] <sup>+</sup>               | 805.5622 | Phosphatidylcholine                                                                                         |
|          |       | PC(18:2(9Z,12Z)/20:4(5Z,8Z,11Z,14Z))             | [M+Na] <sup>+</sup>               | 805.5622 | Phosphatidylcholine                                                                                         |
|          |       | PC(18:2(9Z,12Z)/20:4(8Z,11Z,14Z,17Z))            | [M+Na] <sup>+</sup>               | 805.5622 | Phosphatidylcholine                                                                                         |
|          |       | PC(18:1(9Z)/20:5(5Z,8Z,11Z,14Z,17Z))             | [M+Na] <sup>+</sup>               | 805.5622 | Phosphatidylcholine                                                                                         |
|          |       | PC(18:1(11Z)/20:5(5Z,8Z,11Z,14Z,17Z))            | [M+Na] <sup>+</sup>               | 805.5622 | Phosphatidylcholine                                                                                         |
|          |       | PC(16:1(9Z)/22:5(7Z,10Z,13Z,16Z,19Z))            | [M+Na] <sup>+</sup>               | 805.5622 | Phosphatidylcholine                                                                                         |
|          |       | PC(16:1(9Z)/22:5(4Z,7Z,10Z,13Z,16Z))             | [M+Na] <sup>+</sup>               | 805.5622 | Phosphatidylcholine                                                                                         |
|          |       | PC(16:0/22:6(4Z,7Z,10Z,13Z,16Z,19Z))             | [M+Na] <sup>+</sup>               | 805.5622 | Phosphatidylcholine                                                                                         |
| 221.0960 | 5.93  | Valylcysteine                                    | [M+H] <sup>+</sup>                | 220.0882 | Dipeptide of valine and cysteine – Incomplete breakdown of protein digestion or protein catabolism          |
|          |       | N-Acetyl-S-allylcysteine                         | [M+NH <sub>4</sub> ] <sup>+</sup> | 203.0616 | N-acyl-l-alpha-amino acids                                                                                  |
|          |       | 1-[2-Methyl-3-(methylthio) allyl]cyclohex-2-enol | [M+Na] <sup>+</sup>               | 198.1078 | Tertiary alcohols – Can be found in feces                                                                   |
|          |       | Alanylmethionine                                 | [M+H] <sup>+</sup>                | 220.0882 | Peptides – Found in anatidaes, chicken, pigs. Secondary metabolite                                          |
|          |       | Methionyl-Alanine                                | [M+H] <sup>+</sup>                | 220.0882 | Dipeptide of methionine and alanine – Incomplete breakdown of protein digestion or protein catabolism       |
|          |       | Cysteinyl-Valine                                 | [M+H] <sup>+</sup>                | 220.0882 | Dipeptide of cysteinyl and valine – Incomplete breakdown product of protein digestion or protein catabolism |
| 874.5538 | 19.89 | PC(22:6(4Z,7Z,11E,13Z,15E,19Z)-2OH(10S,17)/17:0) | [M+Na] <sup>+</sup>               | 851.5676 | Oxidized phosphotidylcholine                                                                                |
|          |       | PC(17:0/22:6(4Z,7Z,11E,13Z,15E,19Z)-2OH(10S,17)) | [M+Na] <sup>+</sup>               | 851.5676 | Oxidized phosphotidylcholine                                                                                |
|          |       | PC(22:6(5Z,8E,10Z,13Z,15E,19Z)-2OH(7S,17S)/17:0) | [M+Na] <sup>+</sup>               | 851.5676 | Oxidized phosphotidylcholine                                                                                |

|  |                                                   |                     |          |                                   |
|--|---------------------------------------------------|---------------------|----------|-----------------------------------|
|  | PC(17:0/22:6(5Z,8E,10Z,13Z,15E,19Z)-2OH(7S,17S))  | [M+Na] <sup>+</sup> | 851.5676 | Oxidized phosphatidylcholine      |
|  | PE(18:3(9,11,15)-OH(13)/DiMe(13,5))               | [M+Na] <sup>+</sup> | 851.5676 | Oxidized Phosphatidylethanolamine |
|  | PE(DiMe(13,5)/18:3(9,11,15)-OH(13))               | [M+Na] <sup>+</sup> | 851.5676 | Oxidized Phosphatidylethanolamine |
|  | PE(18:3(10,12,15)-OH(9)/DiMe(13,5))               | [M+Na] <sup>+</sup> | 851.5676 | Oxidized Phosphatidylethanolamine |
|  | PE(DiMe(13,5)/18:3(10,12,15)-OH(9))               | [M+Na] <sup>+</sup> | 851.5676 | Oxidized Phosphatidylethanolamine |
|  | PE(18:2(9Z,11E)+=O(13)/DiMe(13,5))                | [M+Na] <sup>+</sup> | 851.5676 | Oxidized Phosphatidylethanolamine |
|  | PE(DiMe(13,5)/18:2(9Z,11E)+=O(13))                | [M+Na] <sup>+</sup> | 851.5676 | Oxidized Phosphatidylethanolamine |
|  | PE(18:2(10E,12Z)+=O(9)/DiMe(13,5))                | [M+Na] <sup>+</sup> | 851.5676 | Oxidized Phosphatidylethanolamine |
|  | PE(DiMe(13,5)/18:2(10E,12Z)+=O(9))                | [M+Na] <sup>+</sup> | 851.5676 | Oxidized Phosphatidylethanolamine |
|  | PE(20:3(6,8,11)-OH(5)/DiMe(11,5))                 | [M+Na] <sup>+</sup> | 851.5676 | Oxidized Phosphatidylethanolamine |
|  | PE(DiMe(11,5)/20:3(6,8,11)-OH(5))                 | [M+Na] <sup>+</sup> | 851.5676 | Oxidized Phosphatidylethanolamine |
|  | PE(20:4(8Z,11Z,14Z,17Z)-2OH(5S,6R)/22:2(13Z,16Z)) | [M+Na] <sup>+</sup> | 851.5676 | Oxidized Phosphatidylethanolamine |
|  | PE(22:2(13Z,16Z)/20:4(8Z,11Z,14Z,17Z)-2OH(5S,6R)) | [M+Na] <sup>+</sup> | 851.5676 | Oxidized Phosphatidylethanolamine |
|  | PE(20:4(6E,8Z,11Z,13E)-2OH(5S,15S)/22:2(13Z,16Z)) | [M+Na] <sup>+</sup> | 851.5676 | Oxidized Phosphatidylethanolamine |
|  | PE(22:2(13Z,16Z)/20:4(6E,8Z,11Z,13E)-2OH(5S,15S)) | [M+Na] <sup>+</sup> | 851.5676 | Oxidized Phosphatidylethanolamine |
|  | PE(20:4(6Z,8E,10E,14Z)-2OH(5S,12R)/22:2(13Z,16Z)) | [M+Na] <sup>+</sup> | 851.5676 | Oxidized Phosphatidylethanolamine |
|  | PE(22:2(13Z,16Z)/20:4(6Z,8E,10E,14Z)-2OH(5S,12R)) | [M+Na] <sup>+</sup> | 851.5676 | Oxidized Phosphatidylethanolamine |
|  | PE(PGJ2/22:1(13Z))                                | [M+Na] <sup>+</sup> | 851.5676 | Oxidized Phosphatidylethanolamine |
|  | PE(22:1(13Z)/PGJ2)                                | [M+Na] <sup>+</sup> | 851.5676 | Oxidized Phosphatidylethanolamine |
|  | PE(22:6(4Z,7Z,11E,13Z,15E,19Z)-2OH(10S,17)/20:0)  | [M+Na] <sup>+</sup> | 851.5676 | Oxidized Phosphatidylethanolamine |
|  | PE(20:0/22:6(4Z,7Z,11E,13Z,15E,19Z)-2OH(10S,17))  | [M+Na] <sup>+</sup> | 851.5676 | Oxidized Phosphatidylethanolamine |

|  |                                                  |                     |          |                                    |
|--|--------------------------------------------------|---------------------|----------|------------------------------------|
|  | PE(22:6(5Z,8E,10Z,13Z,15E,19Z)-2OH(7S,17S)/20:0) | [M+Na] <sup>+</sup> | 851.5676 | Oxidized Phosphatidylethanolamine  |
|  | PE(20:0/22:6(5Z,8E,10Z,13Z,15E,19Z)-2OH(7S,17S)) | [M+Na] <sup>+</sup> | 851.5676 | Oxidized Phosphatidylethanolamine  |
|  | PE-NMe2(9M5/11M5)                                | [M+Na] <sup>+</sup> | 851.5676 | DimethylPhosphatidylethanolamine   |
|  | PE-NMe2(9D5/9D5)                                 | [M+Na] <sup>+</sup> | 851.5676 | DimethylPhosphatidylethanolamine   |
|  | PE-NMe2(9D5/11D3)                                | [M+Na] <sup>+</sup> | 851.5676 | DimethylPhosphatidylethanolamine   |
|  | PE-NMe2(9D3/11D5)                                | [M+Na] <sup>+</sup> | 851.5676 | DimethylPhosphatidylethanolamine   |
|  | PE-NMe2(11M5/9M5)                                | [M+Na] <sup>+</sup> | 851.5676 | DimethylPhosphatidylethanolamine   |
|  | PE-NMe2(11M5/11M3)                               | [M+Na] <sup>+</sup> | 851.5676 | DimethylPhosphatidylethanolamine   |
|  | PE-NMe2(11M3/11M5)                               | [M+Na] <sup>+</sup> | 851.5676 | DimethylPhosphatidylethanolamine   |
|  | PE-NMe2(11D5/9D3)                                | [M+Na] <sup>+</sup> | 851.5676 | DimethylPhosphatidylethanolamine   |
|  | PE-NMe2(11D3/9D5)                                | [M+Na] <sup>+</sup> | 851.5676 | DimethylPhosphatidylethanolamine   |
|  | PE-NMe2(11D3/11D3)                               | [M+Na] <sup>+</sup> | 851.5676 | DimethylPhosphatidylethanolamine   |
|  | PE-NMe(9M5/11D5)                                 | [M+Na] <sup>+</sup> | 851.5676 | MonomethylPhosphatidylethanolamine |
|  | PE-NMe(9D5/11M5)                                 | [M+Na] <sup>+</sup> | 851.5676 | MonomethylPhosphatidylethanolamine |
|  | PE-NMe(9D3/13M5)                                 | [M+Na] <sup>+</sup> | 851.5676 | MonomethylPhosphatidylethanolamine |
|  | PE-NMe(13M5/9D3)                                 | [M+Na] <sup>+</sup> | 851.5676 | MonomethylPhosphatidylethanolamine |
|  | PE-NMe(11M5/9D5)                                 | [M+Na] <sup>+</sup> | 851.5676 | MonomethylPhosphatidylethanolamine |
|  | PE-NMe(11M5/11D3)                                | [M+Na] <sup>+</sup> | 851.5676 | MonomethylPhosphatidylethanolamine |
|  | PE-NMe(11M3/11D5)                                | [M+Na] <sup>+</sup> | 851.5676 | MonomethylPhosphatidylethanolamine |
|  | PE-NMe(11D5/9M5)                                 | [M+Na] <sup>+</sup> | 851.5676 | MonomethylPhosphatidylethanolamine |

|          |      |                               |                                   |          |                                    |
|----------|------|-------------------------------|-----------------------------------|----------|------------------------------------|
|          |      | PE-NMe(11D5/11M3)             | [M+Na] <sup>+</sup>               | 851.5676 | MonomethylPhosphatidylethanolamine |
|          |      | PE-NMe(11D3/11M5)             | [M+Na] <sup>+</sup>               | 851.5676 | MonomethylPhosphatidylethanolamine |
|          |      | PE(MonoMe(9,5)/MonoMe(13,5))  | [M+Na] <sup>+</sup>               | 851.5676 | Phosphatidylethanolamine           |
|          |      | PE(MonoMe(13,5)/MonoMe(9,5))  | [M+Na] <sup>+</sup>               | 851.5676 | Phosphatidylethanolamine           |
|          |      | PE(MonoMe(13,5)/MonoMe(11,3)) | [M+Na] <sup>+</sup>               | 851.5676 | Phosphatidylethanolamine           |
|          |      | PE(MonoMe(11,5)/MonoMe(11,5)) | [M+Na] <sup>+</sup>               | 851.5676 | Phosphatidylethanolamine           |
|          |      | PE(MonoMe(11,3)/MonoMe(13,5)) | [M+Na] <sup>+</sup>               | 851.5676 | Phosphatidylethanolamine           |
|          |      | PE(DiMe(9,5)/DiMe(11,5))      | [M+Na] <sup>+</sup>               | 851.5676 | Phosphatidylethanolamine           |
|          |      | PE(DiMe(9,3)/DiMe(13,5))      | [M+Na] <sup>+</sup>               | 851.5676 | Phosphatidylethanolamine           |
|          |      | PE(DiMe(13,5)/DiMe(9,3))      | [M+Na] <sup>+</sup>               | 851.5676 | Phosphatidylethanolamine           |
|          |      | PE(DiMe(11,5)/DiMe(9,5))      | [M+Na] <sup>+</sup>               | 851.5676 | Phosphatidylethanolamine           |
|          |      | PE(DiMe(11,5)/DiMe(11,3))     | [M+Na] <sup>+</sup>               | 851.5676 | Phosphatidylethanolamine           |
|          |      | PE(DiMe(11,3)/DiMe(11,5))     | [M+Na] <sup>+</sup>               | 851.5676 | Phosphatidylethanolamine           |
|          |      | PC(MonoMe(9,5)/DiMe(9,5))     | [M+Na] <sup>+</sup>               | 852.5755 | Phosphatidylcholine                |
|          |      | PC(MonoMe(9,5)/DiMe(11,3))    | [M+Na] <sup>+</sup>               | 852.5755 | Phosphatidylcholine                |
|          |      | PC(MonoMe(11,5)/DiMe(9,3))    | [M+Na] <sup>+</sup>               | 852.5755 | Phosphatidylcholine                |
|          |      | PC(MonoMe(11,3)/DiMe(9,5))    | [M+Na] <sup>+</sup>               | 852.5755 | Phosphatidylcholine                |
|          |      | PC(DiMe(9,5)/MonoMe(9,5))     | [M+Na] <sup>+</sup>               | 852.5755 | Phosphatidylcholine                |
|          |      | PC(MonoMe(11,3)/DiMe(11,3))   | [M+Na] <sup>+</sup>               | 852.5755 | Phosphatidylcholine                |
|          |      | PC(DiMe(9,5)/MonoMe(11,3))    | [M+Na] <sup>+</sup>               | 852.5755 | Phosphatidylcholine                |
|          |      | PC(DiMe(9,3)/MonoMe(11,5))    | [M+Na] <sup>+</sup>               | 852.5755 | Phosphatidylcholine                |
|          |      | PC(DiMe(11,3)/MonoMe(9,5))    | [M+Na] <sup>+</sup>               | 852.5755 | Phosphatidylcholine                |
|          |      | PC(DiMe(11,3)/MonoMe(11,3))   | [M+Na] <sup>+</sup>               | 852.5755 | Phosphatidylcholine                |
|          |      | PGP(18:1(9Z)/18:0)            | [M+NH <sub>4</sub> ] <sup>+</sup> | 856.5231 | Glycerophospholipid                |
|          |      | PGP(18:1(11Z)/18:0)           | [M+NH <sub>4</sub> ] <sup>+</sup> | 856.5231 | Glycerophospholipid                |
|          |      | PGP(18:0/18:1(9Z))            | [M+NH <sub>4</sub> ] <sup>+</sup> | 856.5231 | Glycerophospholipid                |
|          |      | PGP(18:0/18:1(11Z))           | [M+NH <sub>4</sub> ] <sup>+</sup> | 856.5231 | Glycerophospholipid                |
| 399.1776 | 6.18 | 18-Oxocortisol                | [M+Na] <sup>+</sup>               | 376.1886 | 21-hydroxysteroids                 |

|          |      |                                                               |                                   |          |                                                                                                                                                                                                                                         |
|----------|------|---------------------------------------------------------------|-----------------------------------|----------|-----------------------------------------------------------------------------------------------------------------------------------------------------------------------------------------------------------------------------------------|
| 116.0708 | 0.60 | Proline                                                       | [M+H] <sup>+</sup>                | 115.0633 | Amino acid                                                                                                                                                                                                                              |
| 311.1463 | 3.41 | 4-Hydroxyproline galactoside                                  | [M+NH <sub>4</sub> ] <sup>+</sup> | 293.1111 | Fatty alcohol esters                                                                                                                                                                                                                    |
|          |      | Galactosyl 4-hydroxyproline                                   | [M+NH <sub>4</sub> ] <sup>+</sup> | 293.1111 | Alpha-amino acyl ester of carbohydrates                                                                                                                                                                                                 |
|          |      | N-Acetylmuramate                                              | [M+NH <sub>4</sub> ] <sup>+</sup> | 293.1111 | Acylaminosugar                                                                                                                                                                                                                          |
|          |      | (3R)-3,4-Dihydroxy-3-(hydroxymethyl)butanenitrile 4-glucoside | [M+NH <sub>4</sub> ] <sup>+</sup> | 293.1111 | Glycosylglycerols                                                                                                                                                                                                                       |
| 176.0706 | 4.16 | 5-Hydroxyindoleacetaldehyde                                   | [M+H] <sup>+</sup>                | 175.0633 | Hydroxyindoles – Found in rhubarbs, black radish, oriental wheat, garden tomato, wild leeks. Involved in tryptophan metabolism. Can be biosynthesized from serotonin through kynurenine 3-monooxygenase. Biogenic aldehyde of serotonin |
|          |      | Indoleacetic acid                                             | [M+H] <sup>+</sup>                | 175.0633 | Breakdown product of tryptophan metabolism and is often produced by bacteria in mammalian gut. Higher levels associated with bacteria from Clostridium species                                                                          |

Note: \* = Clear peak, but peak shape is subpar

Table S6: Complete List of Tentatively Identified Exogenous Metabolites in Moderate vs. High Models

| m/z      | RT   | Tentative ID                        | Adduct                            | Monoisotopic Mass | Biological Significance                                                                                                                                                                                                                 |
|----------|------|-------------------------------------|-----------------------------------|-------------------|-----------------------------------------------------------------------------------------------------------------------------------------------------------------------------------------------------------------------------------------|
| 211.1441 | 3.90 | (-)-Salsoline                       | [M+NH <sub>4</sub> ] <sup>+</sup> | 193.1103          | Compound that crystallizes from alcohol solution. Used in medicine as antihypertensive agent. Found in male alcoholic inpatients' urine and lumbar cerebrospinal fluid when patients were still intoxicated after heavy alcohol debauch |
|          |      | (S)-N-Methylsalsolinol              | [M+NH <sub>4</sub> ] <sup>+</sup> | 193.1103          | Tetrahydroisoquinolines – Found in anatidaes, chickens, pigs                                                                                                                                                                            |
|          |      | 4-(Butylamino)benzoic acid          | [M+NH <sub>4</sub> ] <sup>+</sup> | 193.1103          | Aminobenzoic acids                                                                                                                                                                                                                      |
|          |      | 5,6-Dihydroxy-2-methylaminotetralin | [M+NH <sub>4</sub> ] <sup>+</sup> | 193.1103          | Tetralins                                                                                                                                                                                                                               |
|          |      | 3-Hydroxy-3-phenylpentanamide       | [M+NH <sub>4</sub> ] <sup>+</sup> | 193.1103          | Phenylpropanes                                                                                                                                                                                                                          |
|          |      | Methoxyphedrine                     | [M+NH <sub>4</sub> ] <sup>+</sup> | 193.1103          | Alkyl-phenylketones                                                                                                                                                                                                                     |
|          |      | Isobutamben                         | [M+NH <sub>4</sub> ] <sup>+</sup> | 193.1103          | Benzoic acid esters                                                                                                                                                                                                                     |
|          |      | Butyl 4-aminobenzoate               | [M+NH <sub>4</sub> ] <sup>+</sup> | 193.1103          | Benzoic acid esters                                                                                                                                                                                                                     |
|          |      | 2-Methylpropyl 2-aminobenzoate      | [M+NH <sub>4</sub> ] <sup>+</sup> | 193.1103          | Benzoic acid esters                                                                                                                                                                                                                     |
|          |      | Ethyl N-ethylanthranilate           | [M+NH <sub>4</sub> ] <sup>+</sup> | 193.1103          | Benzoic acid esters                                                                                                                                                                                                                     |
|          |      | Butyl 2-aminobenzoate               | [M+NH <sub>4</sub> ] <sup>+</sup> | 193.1103          | Benzoic acid esters – secondary metabolite                                                                                                                                                                                              |
|          |      | 2-Isopropylphenyl methylcarbamate   | [M+NH <sub>4</sub> ] <sup>+</sup> | 193.1103          | Cumenes                                                                                                                                                                                                                                 |
|          |      | 3,4-Methylenedioxymethamphetamine   | [M+NH <sub>4</sub> ] <sup>+</sup> | 193.1103          | Benzodioxoles – Known as ecstasy or MDMA                                                                                                                                                                                                |
| 245.1146 | 5.61 | 3,5-Diisopropylsalicylic acid       | [M+Na] <sup>+</sup>               | 222.1256          | Salicylic acids                                                                                                                                                                                                                         |
|          |      | 3-Hexylsalicylic acid               | [M+Na] <sup>+</sup>               | 222.1256          | Salicylic acids                                                                                                                                                                                                                         |
|          |      | (+)-Dehydrovomifoliol               | [M+Na] <sup>+</sup>               | 222.1256          | Sesquiterpenoids – Found in rice                                                                                                                                                                                                        |
|          |      | Hexyl salicylic acid                | [M+Na] <sup>+</sup>               | 222.1256          | O-hydroxybenzoic acid esters                                                                                                                                                                                                            |

|          |       |                                                                                         |                                   |          |                                                                                                                                 |
|----------|-------|-----------------------------------------------------------------------------------------|-----------------------------------|----------|---------------------------------------------------------------------------------------------------------------------------------|
|          |       | 3-Hydroxyibuprofen                                                                      | [M+Na] <sup>+</sup>               | 222.1256 | Phenylpropanoic acids – Metabolite of ibuprofen, a nonsteroidal anti-inflammatory drug for relief of arthritis, fever, and pain |
|          |       | 2-Hydroxyibuprofen                                                                      | [M+Na] <sup>+</sup>               | 222.1256 | Phenylpropanoic acids – Metabolite of ibuprofen, a nonsteroidal anti-inflammatory drug for relief of arthritis, fever, and pain |
|          |       | 1-Hydroxyibuprofen                                                                      | [M+Na] <sup>+</sup>               | 222.1256 | Phenylpropanoic acids – Metabolite of ibuprofen, a nonsteroidal anti-inflammatory drug for relief of arthritis, fever, and pain |
|          |       | Methyl 3-epi-4,5-didehydrojasmonate                                                     | [M+Na] <sup>+</sup>               | 222.1256 | Methyl esters                                                                                                                   |
|          |       | Annuionone B                                                                            | [M+Na] <sup>+</sup>               | 222.1256 | Oxepanes – Found in fats, oils, sunflowers                                                                                      |
|          |       | Isoamyl p-anisate                                                                       | [M+Na] <sup>+</sup>               | 222.1256 | P-methoxybenzoic acids and derivatives                                                                                          |
|          |       | Dehydrovomifoliol                                                                       | [M+Na] <sup>+</sup>               | 222.1256 | Sesquiterpenoids                                                                                                                |
| 215.1279 | 4.78  | 2-Carboxy-5,7-dimethyl-4-octanolide                                                     | [M+H] <sup>+</sup>                | 214.1205 | Gamma butyrolactones                                                                                                            |
|          |       | 5-Hexyltetrahydro-2-oxo-3-furancarboxylic acid                                          | [M+H] <sup>+</sup>                | 214.1205 | Gamma butyrolactones                                                                                                            |
|          |       | alpha-Carboxy-delta-decalactone                                                         | [M+H] <sup>+</sup>                | 214.1205 | Delta valerolactones                                                                                                            |
| 415.2536 | 3.97  | Methyl N-(((2s,3s)-3-[(Propylamino)carbonyl]oxiran-2-Yl)carbonyl)-L-Isoleucyl-L-Proline | [M+NH <sub>4</sub> ] <sup>+</sup> | 397.2213 | Peptides                                                                                                                        |
| 229.1433 | 5.30  | Butanedioic acid, octenyl-                                                              | [M+H] <sup>+</sup>                | 228.1362 | Fatty acid esters                                                                                                               |
|          |       | 5-Heptyltetrahydro-2-oxo-3-furancarboxylic acid                                         | [M+H] <sup>+</sup>                | 228.1362 | Gamma butyrolactones                                                                                                            |
|          |       | Traumatic acid                                                                          | [M+H] <sup>+</sup>                | 228.1362 | Monounsaturated dicarboxylic acid – Found in plants. Potent wound healing agent in plants                                       |
| 802.5350 | 19.32 | Ginsenoside Rg3                                                                         | [M+NH <sub>4</sub> ] <sup>+</sup> | 784.4973 | Triterpenoids                                                                                                                   |
|          |       | Ginsenoside C                                                                           | [M+NH <sub>4</sub> ] <sup>+</sup> | 784.4973 | Triterpenoids                                                                                                                   |



|           |       |                                                                                                                                              |                                   |             |                                                                                                                                                                                                                                          |
|-----------|-------|----------------------------------------------------------------------------------------------------------------------------------------------|-----------------------------------|-------------|------------------------------------------------------------------------------------------------------------------------------------------------------------------------------------------------------------------------------------------|
|           |       | Ginsenoside F2                                                                                                                               | [M+NH <sub>4</sub> ] <sup>+</sup> | 784.4973    | Triterpenoids                                                                                                                                                                                                                            |
| 356.2922  | 14.92 | 2,4,12-Octadecatrienoic acid isobutylamide                                                                                                   | [M+Na] <sup>+</sup>               | 333.3032    | N-acyl amides – Found in Javanese long pepper                                                                                                                                                                                            |
|           |       | Acarbosa                                                                                                                                     | [M+H] <sup>+</sup>                | 645.2480    | Aminocyclitol glycosides                                                                                                                                                                                                                 |
|           |       | Alpha-Acarbose                                                                                                                               | [M+H] <sup>+</sup>                | 645.2480    | Aminocyclitol glycosides                                                                                                                                                                                                                 |
| 646.2575  | 18.76 | Acarbose                                                                                                                                     | [M+H] <sup>+</sup>                | 645.2480    | Aminocyclitol glycosides – Drug that inhibits alpha glucosidase that retards the digestion and absorption of carbohydrates in the small intestine, hence reducing the increase in blood-glucose concentration after a carbohydrate load. |
| 159.1168  | 5.53  | 1-Phenyl-1-cyclohexene                                                                                                                       | [M+H] <sup>+</sup>                | 158.1096    | Benzene and substituted derivatives                                                                                                                                                                                                      |
| 544.3373  | 13.35 | (S)-1-(Sec-Butyl)-N-((4,6-dimethyl-2-oxo-1,2-dihydropyridin-3-yl)methyl)-3-methyl-6-(6-(piperazin-1-yl)pyridin-3-yl)-1H-indole-4-carboxamide | [M+NH <sub>4</sub> ] <sup>+</sup> | 526.3056245 | Pyridinylpiperazines                                                                                                                                                                                                                     |
|           |       | 4-Chlorobenzaldehyde                                                                                                                         | [M+Na] <sup>+</sup>               | 140.0029    | Benzoyl derivatives                                                                                                                                                                                                                      |
|           |       | Benzoyl chloride                                                                                                                             | [M+Na] <sup>+</sup>               | 140.0029    | Benzoic acids and derivatives                                                                                                                                                                                                            |
| 162.9914  | 0.50  | 3-chlorobenzaldehyde                                                                                                                         | [M+Na] <sup>+</sup>               | 140.0029    | Benzoyl derivatives – found in calabash, black raspberry, ginger, tartary buckwheat                                                                                                                                                      |
| 381.2245  | 10.00 | Pracinostat                                                                                                                                  | [M+Na] <sup>+</sup>               | 358.2369    | Benzimidazoles                                                                                                                                                                                                                           |
| 518.3215  | 12.95 | Laprafylline                                                                                                                                 | [M+NH <sub>4</sub> ] <sup>+</sup> | 500.2900    | diphenylmethanes                                                                                                                                                                                                                         |
|           |       | Avocadoene 1-acetate                                                                                                                         | [M+Na] <sup>+</sup>               | 328.2614    | Long-chain fatty alcohols                                                                                                                                                                                                                |
|           |       | Avocadoene 4-acetate                                                                                                                         | [M+Na] <sup>+</sup>               | 328.2614    | Long-chain fatty alcohols                                                                                                                                                                                                                |
| 351.2504  | 12.67 | Avocadoene 2-acetate                                                                                                                         | [M+Na] <sup>+</sup>               | 328.2614    | Long-chain fatty alcohols                                                                                                                                                                                                                |
|           |       | 10,12-Tetracosanedione                                                                                                                       | [M+NH <sub>4</sub> ] <sup>+</sup> | 366.3498    | Beta-diketones                                                                                                                                                                                                                           |
|           |       | 4,6-Tetracosanedione                                                                                                                         | [M+NH <sub>4</sub> ] <sup>+</sup> | 366.3498    | Beta-diketones – Found in fats and oils                                                                                                                                                                                                  |
|           |       | 5,7-Tetracosanedione                                                                                                                         | [M+NH <sub>4</sub> ] <sup>+</sup> | 366.3498    | Beta-diketones – Found in fats and oils                                                                                                                                                                                                  |
| 384.3833* | 13.74 | 7,9-Tetracosanedione                                                                                                                         | [M+NH <sub>4</sub> ] <sup>+</sup> | 366.3498    | Beta-diketones – Found in fats and oils                                                                                                                                                                                                  |

|          |      |                                                              |                                   |          |                                                                                                                                                                       |
|----------|------|--------------------------------------------------------------|-----------------------------------|----------|-----------------------------------------------------------------------------------------------------------------------------------------------------------------------|
|          |      | (E)-2-Tetracosenoic acid                                     | [M+NH <sub>4</sub> ] <sup>+</sup> | 366.3498 | Very long-chain fatty acids                                                                                                                                           |
|          |      | 6,8-Tetracosanedione                                         | [M+NH <sub>4</sub> ] <sup>+</sup> | 366.3498 | Beta-diketones                                                                                                                                                        |
| 399.1776 | 6.18 | Benzoylarginine nitroanilide                                 | [M+H] <sup>+</sup>                | 398.1703 | Hippuric acids and derivatives                                                                                                                                        |
|          |      | 16alpha-Hydroxyprednisolone                                  | [M+Na] <sup>+</sup>               | 376.1886 | 21-hydroxysteroids - Metabolite of budesonide which is a glucocorticoid steroid for treatment of asthma, non-infectious rhinitis, nasal polyposis and Crohn's disease |
|          |      | 1,7-bis-(4-Hydroxy-3-methoxyphenyl)-heptane-3,5-diol         | [M+Na] <sup>+</sup>               | 376.1886 | Curcuminoids – Found in ginger                                                                                                                                        |
|          |      | 12alpha-Hydroxy-13,18-dehydroparain                          | [M+Na] <sup>+</sup>               | 376.1886 | Quassinoids                                                                                                                                                           |
|          |      | 11,12,14-Trihydroxy-7-methoxy-8,11,13-abietatrien-20,6-olide | [M+Na] <sup>+</sup>               | 376.1886 | Diterpene lactones                                                                                                                                                    |
|          |      | N-Allylglycine                                               | [M+H] <sup>+</sup>                | 115.0633 | Alpha amino acids                                                                                                                                                     |
|          |      | 2-Pentenedial                                                | [M+NH <sub>4</sub> ] <sup>+</sup> | 98.0368  | Enals                                                                                                                                                                 |
| 116.0708 | 0.60 | 5-Hydroxy-1-methylpyrrolidin-2-one                           | [M+H] <sup>+</sup>                | 115.0633 | N-alkylpyrrolidines                                                                                                                                                   |
|          |      | N-(2-Hydroxyethyl)acrylamide                                 | [M+H] <sup>+</sup>                | 115.0633 | (AKA PNHEA or polyduramide) N-acylethanolamines                                                                                                                       |
|          |      | 5-Methyl-3(2H)-furanone                                      | [M+NH <sub>4</sub> ] <sup>+</sup> | 98.0368  | Furanones                                                                                                                                                             |
|          |      | alpha-Methylene-gamma-butyrolactone                          | [M+NH <sub>4</sub> ] <sup>+</sup> | 98.0368  | Gamma butyrolactones                                                                                                                                                  |
|          |      | DL-Allylglycine                                              | [M+H] <sup>+</sup>                | 115.0633 | Alpha amino acids                                                                                                                                                     |
|          |      | Acetamidopropanal                                            | [M+H] <sup>+</sup>                | 115.0633 | Acetamidopropanal is associated with urea cycle and metabolism of arginine, proline, glutamate, aspartate and asparagine                                              |
|          |      | 2-Furanmethanol                                              | [M+NH <sub>4</sub> ] <sup>+</sup> | 98.0368  | Heteroaromatic compounds – Found in cereals, potato, white mustards, arabica coffee, cocoa                                                                            |
|          |      | 5-Methyl-2(3H)-furanone                                      | [M+NH <sub>4</sub> ] <sup>+</sup> | 98.0368  | Butenolides – Found in blackberries                                                                                                                                   |
|          |      |                                                              |                                   |          |                                                                                                                                                                       |

|          |       |                                                      |                                   |          |                                                                                                                                                                                                                  |
|----------|-------|------------------------------------------------------|-----------------------------------|----------|------------------------------------------------------------------------------------------------------------------------------------------------------------------------------------------------------------------|
|          |       | Pterolactam                                          | [M+H] <sup>+</sup>                | 115.0633 | Pyrrolidines – Found in green vegetables and root vegetables                                                                                                                                                     |
|          |       | 5-Hydroxy-4-pentenoic acid d-lactone                 | [M+NH <sub>4</sub> ] <sup>+</sup> | 98.0368  | Dihydropyranones – Found in nuts                                                                                                                                                                                 |
|          |       | 4-Amino-2-methylenebutanoic acid                     | [M+H] <sup>+</sup>                | 115.0633 | Gamma amino acids and derivatives                                                                                                                                                                                |
| 549.1857 | 16.38 | Neoacrimarine F                                      | [M+NH <sub>4</sub> ] <sup>+</sup> | 531.1529 | Triacylglycerols                                                                                                                                                                                                 |
|          |       | Neoacrimarine I                                      | [M+NH <sub>4</sub> ] <sup>+</sup> | 531.1529 | Acridones – Found in citrus                                                                                                                                                                                      |
| 176.0706 | 4.16  | 2H-1-Benzopyran-2-one, aminomethyl-                  | [M+H] <sup>+</sup>                | 175.0633 | Coumarins and derivatives                                                                                                                                                                                        |
|          |       | indole-3-glycol aldehyde                             | [M+H] <sup>+</sup>                | 175.0633 | 3-alkylindoles – Found in tree fern, jostaberry, pitanga, pine nut                                                                                                                                               |
|          |       | 3-Acetoxyindole                                      | [M+H] <sup>+</sup>                | 175.0633 | Indoles                                                                                                                                                                                                          |
|          |       | 1,2-Naphthoquinone                                   | [M+NH <sub>4</sub> ] <sup>+</sup> | 158.0368 | Naphthoquinones – primary metabolite                                                                                                                                                                             |
|          |       | Gentianine                                           | [M+H] <sup>+</sup>                | 175.0633 | Pyranopyridines – Found in fenugreek                                                                                                                                                                             |
|          |       | Hydroxymethyl indol-3-yl ketone                      | [M+H] <sup>+</sup>                | 175.0633 | Indoles – Found in mushrooms                                                                                                                                                                                     |
|          |       | 7-Amino-4-methylcoumarin                             | [M+H] <sup>+</sup>                | 175.0633 | Coumarins and derivatives                                                                                                                                                                                        |
|          |       | 1,4-Naphthoquinone                                   | [M+NH <sub>4</sub> ] <sup>+</sup> | 158.0368 | Naphthoquinones – primary metabolite                                                                                                                                                                             |
|          |       | 1-Methoxy-1H-indole-3-carboxaldehyde                 | [M+H] <sup>+</sup>                | 175.0633 | Indoles – Found in broccolis                                                                                                                                                                                     |
| 259.0938 | 5.55  | 2-[(2,6-Dioxocyclohexyl)methyl]cyclohexane-1,3-dione | [M+Na] <sup>+</sup>               | 236.1049 | Beta-diketones                                                                                                                                                                                                   |
|          |       | Carboxy-ibuprofen                                    | [M+Na] <sup>+</sup>               | 236.1049 | Phenylpropanoic acid – Nonsteroidal anti-inflammatory drug used for relief of symptoms of arthritis, fever, pain. Metabolite of ibuprofen. Can be biosynthesized from 3-hydroxyibuprofen via Cytochrome P450 2c9 |
|          |       | Ethyl vanillin isobutyrate                           | [M+Na] <sup>+</sup>               | 236.1049 | Phenol esters                                                                                                                                                                                                    |

Note: \* = Clear peak, but peak shape is subpar



Table S7: Complete List of Tentatively Identified Endogenous Metabolites in Low vs. Moderate Models

| m/z      | RT    | Tentative ID                                                  | Adduct                            | Monoisotopic Mass | Biological Significance                                                                                                                                                                                                                                                                                                                           |
|----------|-------|---------------------------------------------------------------|-----------------------------------|-------------------|---------------------------------------------------------------------------------------------------------------------------------------------------------------------------------------------------------------------------------------------------------------------------------------------------------------------------------------------------|
| 311.1464 | 3.40  | 4-Hydroxyproline galactoside                                  | [M+NH <sub>4</sub> ] <sup>+</sup> | 293.1111          | Fatty alcohol esters                                                                                                                                                                                                                                                                                                                              |
|          |       | Galactosyl 4-hydroxyproline                                   | [M+NH <sub>4</sub> ] <sup>+</sup> | 293.1111          | Alpha-amino acyl ester of carbohydrates                                                                                                                                                                                                                                                                                                           |
|          |       | N-Acetylmuramate                                              | [M+NH <sub>4</sub> ] <sup>+</sup> | 293.1111          | Acylaminosugar – Ubiquitous in all organisms                                                                                                                                                                                                                                                                                                      |
|          |       | (3R)-3,4-Dihydroxy-3-(hydroxymethyl)butanenitrile 4-glucoside | [M+NH <sub>4</sub> ] <sup>+</sup> | 293.1111          | Glycosylglycerols                                                                                                                                                                                                                                                                                                                                 |
| 524.3710 | 14.21 | Deoxycholylasparagine                                         | [M+NH <sub>4</sub> ] <sup>+</sup> | 506.3356          | Bile amino acid conjugates – Consists of deoxycholic acid conjugated to Asparagine at C24 acyl site. Produced by gut microbiota – Secondary bile acid. Increased in patients with Inflammatory Bowel Disease, Cystic Fibrosis, and in infants. Act as agonist for farnesoid X receptor leading to reduced expression of bile acid synthesis genes |
|          |       | Chenodeoxycholylasparagine                                    | [M+NH <sub>4</sub> ] <sup>+</sup> | 506.3356          | Bile amino acid conjugates – Consists of Chenodeoxycholic acid conjugated to Asparagine at C24 acyl site. Produced by gut microbiota – Secondary bile acids. Increased in patients with Inflammatory Bowel Disease, Cystic Fibrosis, and in infants. Act as agonist for farnesoid X receptor                                                      |

|          |      |                                                   |                     |          |                                                                                                                                                                                                                                                                                                                                                                                                                           |
|----------|------|---------------------------------------------------|---------------------|----------|---------------------------------------------------------------------------------------------------------------------------------------------------------------------------------------------------------------------------------------------------------------------------------------------------------------------------------------------------------------------------------------------------------------------------|
|          |      |                                                   |                     |          | leading to reduced expression of bile acid synthesis genes                                                                                                                                                                                                                                                                                                                                                                |
|          |      | LysoPC(0:0/18:0)                                  | [M+H] <sup>+</sup>  | 523.3638 | Lysophospholipid                                                                                                                                                                                                                                                                                                                                                                                                          |
|          |      | LysoPC(18:0/0:0)                                  | [M+H] <sup>+</sup>  | 523.3638 | Lysophospholipid                                                                                                                                                                                                                                                                                                                                                                                                          |
|          |      | Platelet-activating factor                        | [M+H] <sup>+</sup>  | 523.3638 | Ubiquitous, potent phospholipid activator and mediator of inflammation                                                                                                                                                                                                                                                                                                                                                    |
| 263.0887 | 6.70 | 3-Carboxy-4-methyl-5-propyl-2-furanpropionic acid | [M+Na] <sup>+</sup> | 240.0998 | Uremic Toxin – Significantly accumulated in serum of chronic kidney disease patients. Formed from consumption of fish, vegetables, fruits. Strong inhibitor of mitochondrial respiration, associated with thyroid dysfunction. Directly inhibits renal secretion of various drugs and endogenous organic acids by competitively inhibiting OAT3 transporters. Also inhibits organic acid transport at blood-brain-barrier |
|          |      | N-Acetyl-serylaspatic acid                        | [M+H] <sup>+</sup>  | 262.0801 | Dipeptide                                                                                                                                                                                                                                                                                                                                                                                                                 |
|          |      | Glutamylaspatic acid                              | [M+H] <sup>+</sup>  | 262.0801 | Dipeptide – Incomplete breakdown product of protein digestion or catabolism. Found in pulses and soybean                                                                                                                                                                                                                                                                                                                  |
|          |      | Aspartyl-Glutamate                                | [M+H] <sup>+</sup>  | 262.0801 | Dipeptide – Incomplete breakdown product of protein digestion or catabolism                                                                                                                                                                                                                                                                                                                                               |
|          |      | gamma-Glutamylaspatic acid                        | [M+H] <sup>+</sup>  | 262.0801 | Dipeptide – Incomplete breakdown product of protein digestion or catabolism. Found in pulses                                                                                                                                                                                                                                                                                                                              |

|          |       |                                           |                                   |          |                               |
|----------|-------|-------------------------------------------|-----------------------------------|----------|-------------------------------|
| 641.5110 | 20.65 | Cer(d16:1/TXB2)                           | [M+NH <sub>4</sub> ] <sup>+</sup> | 623.4761 | Sphingolipid/glycosylceramide |
|          |       | Cer(d16:1/6 keto-PGF1alpha)               | [M+NH <sub>4</sub> ] <sup>+</sup> | 623.4761 | Sphingolipid/glycosylceramide |
|          |       | DG(16:0/20:3(11Z,14Z,17Z)/0:0)            | [M+Na] <sup>+</sup>               | 618.5223 | Diacylglycerol                |
|          |       | DG(16:1n7/0:0/20:2n6)                     | [M+Na] <sup>+</sup>               | 618.5223 | Diacylglycerol                |
|          |       | DG(14:1n5/0:0/22:2n6)                     | [M+Na] <sup>+</sup>               | 618.5223 | Diacylglycerol                |
|          |       | DG(18:0/0:0/18:3n3)                       | [M+Na] <sup>+</sup>               | 618.5223 | Diacylglycerol                |
|          |       | DG(18:0/0:0/18:3n6)                       | [M+Na] <sup>+</sup>               | 618.5223 | Diacylglycerol                |
|          |       | DG(16:0/0:0/20:3n6)                       | [M+Na] <sup>+</sup>               | 618.5223 | Diacylglycerol                |
|          |       | DG(16:0/0:0/20:3n9)                       | [M+Na] <sup>+</sup>               | 618.5223 | Diacylglycerol                |
|          |       | DG(20:2n6/0:0/18:4n3)                     | [M+H] <sup>+</sup>                | 640.5067 | Diacylglycerol                |
|          |       | DG(20:3n6/0:0/18:3n3)                     | [M+H] <sup>+</sup>                | 640.5067 | Diacylglycerol                |
|          |       | DG(18:3n6/0:0/20:3n6)                     | [M+H] <sup>+</sup>                | 640.5067 | Diacylglycerol                |
|          |       | DG(20:3n9/0:0/18:3n3)                     | [M+H] <sup>+</sup>                | 640.5067 | Diacylglycerol                |
|          |       | DG(20:3n9/0:0/18:3n6)                     | [M+H] <sup>+</sup>                | 640.5067 | Diacylglycerol                |
|          |       | DG(18:1n9/0:0/20:5n3)                     | [M+H] <sup>+</sup>                | 640.5067 | Diacylglycerol                |
|          |       | DG(18:1n7/0:0/20:5n3)                     | [M+H] <sup>+</sup>                | 640.5067 | Diacylglycerol                |
|          |       | DG(16:1n7/0:0/22:5n3)                     | [M+H] <sup>+</sup>                | 640.5067 | Diacylglycerol                |
|          |       | DG(16:1n7/0:0/22:5n6)                     | [M+H] <sup>+</sup>                | 640.5067 | Diacylglycerol                |
|          |       | DG(16:0/0:0/22:6n3)                       | [M+H] <sup>+</sup>                | 640.5067 | Diacylglycerol                |
|          |       | DG(22:6(4Z,7Z,10Z,13Z,16Z,19Z)/16:0/0:0)  | [M+H] <sup>+</sup>                | 640.5067 | Diacylglycerol                |
|          |       | DG(22:5(7Z,10Z,13Z,16Z,19Z)/16:1(9Z)/0:0) | [M+H] <sup>+</sup>                | 640.5067 | Diacylglycerol                |
|          |       | DG(22:5(4Z,7Z,10Z,13Z,16Z)/16:1(9Z)/0:0)  | [M+H] <sup>+</sup>                | 640.5067 | Diacylglycerol                |
|          |       | DG(22:2(13Z,16Z)/14:1(9Z)/0:0)            | [M+Na] <sup>+</sup>               | 618.5223 | Diacylglycerol                |
|          |       | DG(20:5(5Z,8Z,11Z,14Z,17Z)/18:1(9Z)/0:0)  | [M+H] <sup>+</sup>                | 640.5067 | Diacylglycerol                |
|          |       | DG(20:5(5Z,8Z,11Z,14Z,17Z)/18:1(11Z)/0:0) | [M+H] <sup>+</sup>                | 640.5067 | Diacylglycerol                |
|          |       | DG(20:4(8Z,11Z,14Z,17Z)/18:2(9Z,12Z)/0:0) | [M+H] <sup>+</sup>                | 640.5067 | Diacylglycerol                |
|          |       | DG(20:4(5Z,8Z,11Z,14Z)/18:2(9Z,12Z)/0:0)  | [M+H] <sup>+</sup>                | 640.5067 | Diacylglycerol                |
|          |       | DG(20:3(8Z,11Z,14Z)/18:3(9Z,12Z,15Z)/0:0) | [M+H] <sup>+</sup>                | 640.5067 | Diacylglycerol                |
|          |       | DG(20:3(8Z,11Z,14Z)/18:3(6Z,9Z,12Z)/0:0)  | [M+H] <sup>+</sup>                | 640.5067 | Diacylglycerol                |
|          |       | DG(20:3(8Z,11Z,14Z)/16:0/0:0)             | [M+Na] <sup>+</sup>               | 618.5223 | Diacylglycerol                |

|  |                                           |                     |          |                |
|--|-------------------------------------------|---------------------|----------|----------------|
|  | DG(20:3(5Z,8Z,11Z)/18:3(9Z,12Z,15Z)/0:0)  | [M+H] <sup>+</sup>  | 640.5067 | Diacylglycerol |
|  | DG(20:3(5Z,8Z,11Z)/18:3(6Z,9Z,12Z)/0:0)   | [M+H] <sup>+</sup>  | 640.5067 | Diacylglycerol |
|  | DG(20:3(5Z,8Z,11Z)/16:0/0:0)              | [M+Na] <sup>+</sup> | 618.5223 | Diacylglycerol |
|  | DG(20:2(11Z,14Z)/18:4(6Z,9Z,12Z,15Z)/0:0) | [M+H] <sup>+</sup>  | 640.5067 | Diacylglycerol |
|  | DG(20:2(11Z,14Z)/16:1(9Z)/0:0)            | [M+Na] <sup>+</sup> | 618.5223 | Diacylglycerol |
|  | DG(18:4(6Z,9Z,12Z,15Z)/20:2(11Z,14Z)/0:0) | [M+H] <sup>+</sup>  | 640.5067 | Diacylglycerol |
|  | DG(18:3(9Z,12Z,15Z)/20:3(8Z,11Z,14Z)/0:0) | [M+H] <sup>+</sup>  | 640.5067 | Diacylglycerol |
|  | DG(18:3(9Z,12Z,15Z)/20:3(5Z,8Z,11Z)/0:0)  | [M+H] <sup>+</sup>  | 640.5067 | Diacylglycerol |
|  | DG(18:3(9Z,12Z,15Z)/18:0/0:0)             | [M+Na] <sup>+</sup> | 618.5223 | Diacylglycerol |
|  | DG(18:3(6Z,9Z,12Z)/20:3(8Z,11Z,14Z)/0:0)  | [M+H] <sup>+</sup>  | 640.5067 | Diacylglycerol |
|  | DG(18:3(6Z,9Z,12Z)/20:3(5Z,8Z,11Z)/0:0)   | [M+H] <sup>+</sup>  | 640.5067 | Diacylglycerol |
|  | DG(18:3(6Z,9Z,12Z)/18:0/0:0)              | [M+Na] <sup>+</sup> | 618.5223 | Diacylglycerol |
|  | DG(18:2(9Z,12Z)/20:4(8Z,11Z,14Z,17Z)/0:0) | [M+H] <sup>+</sup>  | 640.5067 | Diacylglycerol |
|  | DG(18:2(9Z,12Z)/20:4(5Z,8Z,11Z,14Z)/0:0)  | [M+H] <sup>+</sup>  | 640.5067 | Diacylglycerol |
|  | DG(18:2(9Z,12Z)/18:1(11Z)/0:0)            | [M+Na] <sup>+</sup> | 618.5223 | Diacylglycerol |
|  | DG(18:2(9Z,12Z)/18:1(9Z)/0:0)             | [M+Na] <sup>+</sup> | 618.5223 | Diacylglycerol |
|  | DG(18:1(9Z)/20:5(5Z,8Z,11Z,14Z,17Z)/0:0)  | [M+H] <sup>+</sup>  | 640.5067 | Diacylglycerol |
|  | DG(18:1(9Z)/18:2(9Z,12Z)/0:0)             | [M+Na] <sup>+</sup> | 618.5223 | Diacylglycerol |
|  | DG(18:1(11Z)/20:5(5Z,8Z,11Z,14Z,17Z)/0:0) | [M+H] <sup>+</sup>  | 640.5067 | Diacylglycerol |
|  | DG(18:1(11Z)/18:2(9Z,12Z)/0:0)            | [M+Na] <sup>+</sup> | 618.5223 | Diacylglycerol |
|  | DG(18:0/18:3(6Z,9Z,12Z)/0:0)              | [M+Na] <sup>+</sup> | 618.5223 | Diacylglycerol |
|  | DG(18:0/18:3(9Z,12Z,15Z)/0:0)             | [M+Na] <sup>+</sup> | 618.5223 | Diacylglycerol |
|  | DG(16:1(9Z)/22:5(7Z,10Z,13Z,16Z,19Z)/0:0) | [M+H] <sup>+</sup>  | 640.5067 | Diacylglycerol |
|  | DG(16:1(9Z)/22:5(4Z,7Z,10Z,13Z,16Z)/0:0)  | [M+H] <sup>+</sup>  | 640.5067 | Diacylglycerol |
|  | DG(16:1(9Z)/20:2(11Z,14Z)/0:0)            | [M+Na] <sup>+</sup> | 618.5223 | Diacylglycerol |
|  | DG(16:0/22:6(4Z,7Z,10Z,13Z,16Z,19Z)/0:0)  | [M+H] <sup>+</sup>  | 640.5067 | Diacylglycerol |
|  | DG(16:0/20:3(8Z,11Z,14Z)/0:0)             | [M+Na] <sup>+</sup> | 618.5223 | Diacylglycerol |
|  | DG(16:0/20:3(5Z,8Z,11Z)/0:0)              | [M+Na] <sup>+</sup> | 618.5223 | Diacylglycerol |
|  | DG(14:1(9Z)/22:2(13Z,16Z)/0:0)            | [M+Na] <sup>+</sup> | 618.5223 | Diacylglycerol |



|          |       |                                            |                     |          |                                                                      |
|----------|-------|--------------------------------------------|---------------------|----------|----------------------------------------------------------------------|
| 830.5664 | 19.88 | PC(20:4(5Z,7E,11Z,14Z)-OH(9)/P-18:1(9Z))   | [M+Na] <sup>+</sup> | 807.5778 | Oxidized Phosphatidylcholines - signaling molecules on cell membrane |
|          |       | PC(P-18:1(9Z)/20:4(5Z,7E,11Z,14Z)-OH(9))   | [M+Na] <sup>+</sup> | 807.5778 | Oxidized Phosphatidylcholines - signaling molecules on cell membrane |
|          |       | PC(20:4(5E,8Z,12Z,14Z)-OH(11R)/P-18:1(9Z)) | [M+Na] <sup>+</sup> | 807.5778 | Oxidized Phosphatidylcholines - signaling molecules on cell membrane |
|          |       | PC(P-18:1(9Z)/20:4(5E,8Z,12Z,14Z)-OH(11R)) | [M+Na] <sup>+</sup> | 807.5778 | Oxidized Phosphatidylcholines - signaling molecules on cell membrane |
|          |       | PC(20:4(5Z,8Z,10E,14Z)-OH(12S)/P-18:1(9Z)) | [M+Na] <sup>+</sup> | 807.5778 | Oxidized Phosphatidylcholines - signaling molecules on cell membrane |
|          |       | PC(P-18:1(9Z)/20:4(5Z,8Z,10E,14Z)-OH(12S)) | [M+Na] <sup>+</sup> | 807.5778 | Oxidized Phosphatidylcholines - signaling molecules on cell membrane |
|          |       | PC(20:4(5Z,8Z,11Z,13E)-OH(15S)/P-18:1(9Z)) | [M+Na] <sup>+</sup> | 807.5778 | Oxidized Phosphatidylcholines - signaling molecules on cell membrane |
|          |       | PC(P-18:1(9Z)/20:4(5Z,8Z,11Z,13E)-OH(15S)) | [M+Na] <sup>+</sup> | 807.5778 | Oxidized Phosphatidylcholines - signaling molecules on cell membrane |
|          |       | PC(20:4(5Z,8Z,11Z,14Z)-OH(16R)/P-18:1(9Z)) | [M+Na] <sup>+</sup> | 807.5778 | Oxidized Phosphatidylcholines - signaling molecules on cell membrane |
|          |       | PC(P-18:1(9Z)/20:4(5Z,8Z,11Z,14Z)-OH(16R)) | [M+Na] <sup>+</sup> | 807.5778 | Oxidized Phosphatidylcholines - signaling molecules on cell membrane |

|  |  |                                            |                     |          |                                                                      |
|--|--|--------------------------------------------|---------------------|----------|----------------------------------------------------------------------|
|  |  | PC(20:4(5Z,8Z,11Z,14Z)-OH(17)/P-18:1(9Z))  | [M+Na] <sup>+</sup> | 807.5778 | Oxidized Phosphatidylcholines - signaling molecules on cell membrane |
|  |  | PC(P-18:1(9Z)/20:4(5Z,8Z,11Z,14Z)-OH(17))  | [M+Na] <sup>+</sup> | 807.5778 | Oxidized Phosphatidylcholines - signaling molecules on cell membrane |
|  |  | PC(20:4(5Z,8Z,11Z,14Z)-OH(18R)/P-18:1(9Z)) | [M+Na] <sup>+</sup> | 807.5778 | Oxidized Phosphatidylcholines - signaling molecules on cell membrane |
|  |  | PC(P-18:1(9Z)/20:4(5Z,8Z,11Z,14Z)-OH(18R)) | [M+Na] <sup>+</sup> | 807.5778 | Oxidized Phosphatidylcholines - signaling molecules on cell membrane |
|  |  | PC(20:4(5Z,8Z,11Z,14Z)-OH(19S)/P-18:1(9Z)) | [M+Na] <sup>+</sup> | 807.5778 | Oxidized Phosphatidylcholines - signaling molecules on cell membrane |
|  |  | PC(P-18:1(9Z)/20:4(5Z,8Z,11Z,14Z)-OH(19S)) | [M+Na] <sup>+</sup> | 807.5778 | Oxidized Phosphatidylcholines - signaling molecules on cell membrane |
|  |  | PC(20:4(6E,8Z,11Z,14Z)-OH(5S)/P-18:1(9Z))  | [M+Na] <sup>+</sup> | 807.5778 | Oxidized Phosphatidylcholines - signaling molecules on cell membrane |
|  |  | PC(P-18:1(9Z)/20:4(6E,8Z,11Z,14Z)-OH(5S))  | [M+Na] <sup>+</sup> | 807.5778 | Oxidized Phosphatidylcholines - signaling molecules on cell membrane |
|  |  | PC(20:4(5Z,8Z,11Z,14Z)-OH(20)/P-18:1(9Z))  | [M+Na] <sup>+</sup> | 807.5778 | Oxidized Phosphatidylcholines - signaling molecules on cell membrane |
|  |  | PC(P-18:1(9Z)/20:4(5Z,8Z,11Z,14Z)-OH(20))  | [M+Na] <sup>+</sup> | 807.5778 | Oxidized Phosphatidylcholines - signaling molecules on cell membrane |

|  |  |                                           |                     |          |                                                                      |
|--|--|-------------------------------------------|---------------------|----------|----------------------------------------------------------------------|
|  |  | PC(20:3(8Z,11Z,14Z)-O(5,6)/P-18:1(9Z))    | [M+Na] <sup>+</sup> | 807.5778 | Oxidized Phosphatidylcholines - signaling molecules on cell membrane |
|  |  | PC(P-18:1(9Z)/20:3(8Z,11Z,14Z)-O(5,6))    | [M+Na] <sup>+</sup> | 807.5778 | Oxidized Phosphatidylcholines - signaling molecules on cell membrane |
|  |  | PC(20:3(5Z,11Z,14Z)-O(8,9)/P-18:1(9Z))    | [M+Na] <sup>+</sup> | 807.5778 | Oxidized Phosphatidylcholines - signaling molecules on cell membrane |
|  |  | PC(P-18:1(9Z)/20:3(5Z,11Z,14Z)-O(8,9))    | [M+Na] <sup>+</sup> | 807.5778 | Oxidized Phosphatidylcholines - signaling molecules on cell membrane |
|  |  | PC(20:3(5Z,8Z,14Z)-O(11S,12R)/P-18:1(9Z)) | [M+Na] <sup>+</sup> | 807.5778 | Oxidized Phosphatidylcholines - signaling molecules on cell membrane |
|  |  | PC(P-18:1(9Z)/20:3(5Z,8Z,14Z)-O(11S,12R)) | [M+Na] <sup>+</sup> | 807.5778 | Oxidized Phosphatidylcholines - signaling molecules on cell membrane |
|  |  | PC(20:3(5Z,8Z,11Z)-O(14R,15S)/P-18:1(9Z)) | [M+Na] <sup>+</sup> | 807.5778 | Oxidized Phosphatidylcholines - signaling molecules on cell membrane |
|  |  | PC(P-18:1(9Z)/20:3(5Z,8Z,11Z)-O(14R,15S)) | [M+Na] <sup>+</sup> | 807.5778 | Oxidized Phosphatidylcholines - signaling molecules on cell membrane |
|  |  | PC(20:4(5Z,7E,11Z,14Z)-OH(9)/P-18:1(11Z)) | [M+Na] <sup>+</sup> | 807.5778 | Oxidized Phosphatidylcholines - signaling molecules on cell membrane |
|  |  | PC(P-18:1(11Z)/20:4(5Z,7E,11Z,14Z)-OH(9)) | [M+Na] <sup>+</sup> | 807.5778 | Oxidized Phosphatidylcholines - signaling molecules on cell membrane |

|  |  |                                             |                     |          |                                                                      |
|--|--|---------------------------------------------|---------------------|----------|----------------------------------------------------------------------|
|  |  | PC(20:4(5E,8Z,12Z,14Z)-OH(11R)/P-18:1(11Z)) | [M+Na] <sup>+</sup> | 807.5778 | Oxidized Phosphatidylcholines - signaling molecules on cell membrane |
|  |  | PC(P-18:1(11Z)/20:4(5E,8Z,12Z,14Z)-OH(11R)) | [M+Na] <sup>+</sup> | 807.5778 | Oxidized Phosphatidylcholines - signaling molecules on cell membrane |
|  |  | PC(20:4(5Z,8Z,10E,14Z)-OH(12S)/P-18:1(11Z)) | [M+Na] <sup>+</sup> | 807.5778 | Oxidized Phosphatidylcholines - signaling molecules on cell membrane |
|  |  | PC(P-18:1(11Z)/20:4(5Z,8Z,10E,14Z)-OH(12S)) | [M+Na] <sup>+</sup> | 807.5778 | Oxidized Phosphatidylcholines - signaling molecules on cell membrane |
|  |  | PC(20:4(5Z,8Z,11Z,13E)-OH(15S)/P-18:1(11Z)) | [M+Na] <sup>+</sup> | 807.5778 | Oxidized Phosphatidylcholines - signaling molecules on cell membrane |
|  |  | PC(P-18:1(11Z)/20:4(5Z,8Z,11Z,13E)-OH(15S)) | [M+Na] <sup>+</sup> | 807.5778 | Oxidized Phosphatidylcholines - signaling molecules on cell membrane |
|  |  | PC(20:4(5Z,8Z,11Z,14Z)-OH(16R)/P-18:1(11Z)) | [M+Na] <sup>+</sup> | 807.5778 | Oxidized Phosphatidylcholines - signaling molecules on cell membrane |
|  |  | PC(P-18:1(11Z)/20:4(5Z,8Z,11Z,14Z)-OH(16R)) | [M+Na] <sup>+</sup> | 807.5778 | Oxidized Phosphatidylcholines - signaling molecules on cell membrane |
|  |  | PC(20:4(5Z,8Z,11Z,14Z)-OH(17)/P-18:1(11Z))  | [M+Na] <sup>+</sup> | 807.5778 | Oxidized Phosphatidylcholines - signaling molecules on cell membrane |
|  |  | PC(P-18:1(11Z)/20:4(5Z,8Z,11Z,14Z)-OH(17))  | [M+Na] <sup>+</sup> | 807.5778 | Oxidized Phosphatidylcholines - signaling molecules on cell membrane |

|  |  |                                             |                     |          |                                                                      |
|--|--|---------------------------------------------|---------------------|----------|----------------------------------------------------------------------|
|  |  | PC(20:4(5Z,8Z,11Z,14Z)-OH(18R)/P-18:1(11Z)) | [M+Na] <sup>+</sup> | 807.5778 | Oxidized Phosphatidylcholines - signaling molecules on cell membrane |
|  |  | PC(P-18:1(11Z)/20:4(5Z,8Z,11Z,14Z)-OH(18R)) | [M+Na] <sup>+</sup> | 807.5778 | Oxidized Phosphatidylcholines - signaling molecules on cell membrane |
|  |  | PC(20:4(5Z,8Z,11Z,14Z)-OH(19S)/P-18:1(11Z)) | [M+Na] <sup>+</sup> | 807.5778 | Oxidized Phosphatidylcholines - signaling molecules on cell membrane |
|  |  | PC(P-18:1(11Z)/20:4(5Z,8Z,11Z,14Z)-OH(19S)) | [M+Na] <sup>+</sup> | 807.5778 | Oxidized Phosphatidylcholines - signaling molecules on cell membrane |
|  |  | PC(20:4(6E,8Z,11Z,14Z)-OH(5S)/P-18:1(11Z))  | [M+Na] <sup>+</sup> | 807.5778 | Oxidized Phosphatidylcholines - signaling molecules on cell membrane |
|  |  | PC(P-18:1(11Z)/20:4(6E,8Z,11Z,14Z)-OH(5S))  | [M+Na] <sup>+</sup> | 807.5778 | Oxidized Phosphatidylcholines - signaling molecules on cell membrane |
|  |  | PC(20:4(5Z,8Z,11Z,14Z)-OH(20)/P-18:1(11Z))  | [M+Na] <sup>+</sup> | 807.5778 | Oxidized Phosphatidylcholines - signaling molecules on cell membrane |
|  |  | PC(P-18:1(11Z)/20:4(5Z,8Z,11Z,14Z)-OH(20))  | [M+Na] <sup>+</sup> | 807.5778 | Oxidized Phosphatidylcholines - signaling molecules on cell membrane |
|  |  | PC(20:3(8Z,11Z,14Z)-O(5,6)/P-18:1(11Z))     | [M+Na] <sup>+</sup> | 807.5778 | Oxidized Phosphatidylcholines - signaling molecules on cell membrane |
|  |  | PC(P-18:1(11Z)/20:3(8Z,11Z,14Z)-O(5,6))     | [M+Na] <sup>+</sup> | 807.5778 | Oxidized Phosphatidylcholines - signaling molecules on cell membrane |

|  |  |                                            |                     |          |                                                                      |
|--|--|--------------------------------------------|---------------------|----------|----------------------------------------------------------------------|
|  |  | PC(20:3(5Z,11Z,14Z)-O(8,9)/P-18:1(11Z))    | [M+Na] <sup>+</sup> | 807.5778 | Oxidized Phosphatidylcholines - signaling molecules on cell membrane |
|  |  | PC(P-18:1(11Z)/20:3(5Z,11Z,14Z)-O(8,9))    | [M+Na] <sup>+</sup> | 807.5778 | Oxidized Phosphatidylcholines - signaling molecules on cell membrane |
|  |  | PC(20:3(5Z,8Z,14Z)-O(11S,12R)/P-18:1(11Z)) | [M+Na] <sup>+</sup> | 807.5778 | Oxidized Phosphatidylcholines - signaling molecules on cell membrane |
|  |  | PC(P-18:1(11Z)/20:3(5Z,8Z,14Z)-O(11S,12R)) | [M+Na] <sup>+</sup> | 807.5778 | Oxidized Phosphatidylcholines - signaling molecules on cell membrane |
|  |  | PC(20:3(5Z,8Z,11Z)-O(14R,15S)/P-18:1(11Z)) | [M+Na] <sup>+</sup> | 807.5778 | Oxidized Phosphatidylcholines - signaling molecules on cell membrane |
|  |  | PC(P-18:1(11Z)/20:3(5Z,8Z,11Z)-O(14R,15S)) | [M+Na] <sup>+</sup> | 807.5778 | Oxidized Phosphatidylcholines - signaling molecules on cell membrane |
|  |  | PC(20:5(6E,8Z,11Z,14Z,17Z)-OH(5)/P-18:0)   | [M+Na] <sup>+</sup> | 807.5778 | Oxidized Phosphatidylcholines - signaling molecules on cell membrane |
|  |  | PC(P-18:0/20:5(6E,8Z,11Z,14Z,17Z)-OH(5))   | [M+Na] <sup>+</sup> | 807.5778 | Oxidized Phosphatidylcholines - signaling molecules on cell membrane |
|  |  | PC(20:5(5Z,8Z,10E,14Z,17Z)-OH(12)/P-18:0)  | [M+Na] <sup>+</sup> | 807.5778 | Oxidized Phosphatidylcholines - signaling molecules on cell membrane |
|  |  | PC(P-18:0/20:5(5Z,8Z,10E,14Z,17Z)-OH(12))  | [M+Na] <sup>+</sup> | 807.5778 | Oxidized Phosphatidylcholines - signaling molecules on cell membrane |

|  |  |                                            |                     |          |                                                                                                                                                                      |
|--|--|--------------------------------------------|---------------------|----------|----------------------------------------------------------------------------------------------------------------------------------------------------------------------|
|  |  | PC(20:5(5Z,8Z,11Z,14Z,16E)-OH(18)/P-18:0)  | [M+Na] <sup>+</sup> | 807.5778 | Oxidized Phosphatidylcholines - signaling molecules on cell membrane                                                                                                 |
|  |  | PC(P-18:0/20:5(5Z,8Z,11Z,14Z,16E)-OH(18))  | [M+Na] <sup>+</sup> | 807.5778 | Oxidized Phosphatidylcholines - signaling molecules on cell membrane                                                                                                 |
|  |  | PC(20:5(5Z,8Z,11Z,14Z,16E)-OH(18R)/P-18:0) | [M+Na] <sup>+</sup> | 807.5778 | Oxidized Phosphatidylcholines - signaling molecules on cell membrane                                                                                                 |
|  |  | PC(P-18:0/20:5(5Z,8Z,11Z,14Z,16E)-OH(18R)) | [M+Na] <sup>+</sup> | 807.5778 | Oxidized Phosphatidylcholines - signaling molecules on cell membrane                                                                                                 |
|  |  | PC(20:4(5Z,8Z,11Z,13E)+=O(15)/P-18:0)      | [M+Na] <sup>+</sup> | 807.5778 | Oxidized Phosphatidylcholines - signaling molecules on cell membrane                                                                                                 |
|  |  | PC(P-18:0/20:4(5Z,8Z,11Z,13E)+=O(15))      | [M+Na] <sup>+</sup> | 807.5778 | Oxidized Phosphatidylcholines - signaling molecules on cell membrane                                                                                                 |
|  |  | PC(20:4(6E,8Z,11Z,14Z)+=O(5)/P-18:0)       | [M+Na] <sup>+</sup> | 807.5778 | Oxidized Phosphatidylcholines - signaling molecules on cell membrane                                                                                                 |
|  |  | PC(P-18:0/20:4(6E,8Z,11Z,14Z)+=O(5))       | [M+Na] <sup>+</sup> | 807.5778 | Oxidized Phosphatidylcholines - signaling molecules on cell membrane                                                                                                 |
|  |  | PE-NMe(20:3(5Z,8Z,11Z)/20:2(11Z,14Z))      | [M+Na] <sup>+</sup> | 807.5778 | MonomethylPhosphatidylethanolamine - formed by methylation of Phosphatidylethanolamine as part of biosynthesis of Phosphatidylcholine. Usually found at trace levels |

|  |  |                                        |                     |          |                                                                                                                                                                      |
|--|--|----------------------------------------|---------------------|----------|----------------------------------------------------------------------------------------------------------------------------------------------------------------------|
|  |  | PE-NMe(20:3(8Z,11Z,14Z)/20:2(11Z,14Z)) | [M+Na] <sup>+</sup> | 807.5778 | MonomethylPhosphatidylethanolamine - formed by methylation of Phosphatidylethanolamine as part of biosynthesis of Phosphatidylcholine. Usually found at trace levels |
|  |  | PE-NMe(20:2(11Z,14Z)/20:3(8Z,11Z,14Z)) | [M+Na] <sup>+</sup> | 807.5778 | MonomethylPhosphatidylethanolamine - formed by methylation of Phosphatidylethanolamine as part of biosynthesis of Phosphatidylcholine. Usually found at trace levels |
|  |  | PE-NMe(20:2(11Z,14Z)/20:3(5Z,8Z,11Z))  | [M+Na] <sup>+</sup> | 807.5778 | MonomethylPhosphatidylethanolamine - formed by methylation of Phosphatidylethanolamine as part of biosynthesis of Phosphatidylcholine. Usually found at trace levels |
|  |  | PE-NMe(22:5(7Z,10Z,13Z,16Z,19Z)/18:0)  | [M+Na] <sup>+</sup> | 807.5778 | MonomethylPhosphatidylethanolamine - formed by methylation of Phosphatidylethanolamine as part of biosynthesis of Phosphatidylcholine. Usually found at trace levels |
|  |  | PE-NMe(22:5(4Z,7Z,10Z,13Z,16Z)/18:0)   | [M+Na] <sup>+</sup> | 807.5778 | MonomethylPhosphatidylethanolamine - formed by methylation of Phosphatidylethanolamine as part of biosynthesis of Phosphatidylcholine. Usually found at trace levels |



|  |  |                                        |                     |          |                                                                                                                                                                      |
|--|--|----------------------------------------|---------------------|----------|----------------------------------------------------------------------------------------------------------------------------------------------------------------------|
|  |  | PE-NMe(22:4(7Z,10Z,13Z,16Z)/18:1(9Z))  | [M+Na] <sup>+</sup> | 807.5778 | MonomethylPhosphatidylethanolamine - formed by methylation of Phosphatidylethanolamine as part of biosynthesis of Phosphatidylcholine. Usually found at trace levels |
|  |  | PE-NMe(22:4(7Z,10Z,13Z,16Z)/18:1(11Z)) | [M+Na] <sup>+</sup> | 807.5778 | MonomethylPhosphatidylethanolamine - formed by methylation of Phosphatidylethanolamine as part of biosynthesis of Phosphatidylcholine. Usually found at trace levels |
|  |  | PE-NMe(22:2(13Z,16Z)/18:3(6Z,9Z,12Z))  | [M+Na] <sup>+</sup> | 807.5778 | MonomethylPhosphatidylethanolamine - formed by methylation of Phosphatidylethanolamine as part of biosynthesis of Phosphatidylcholine. Usually found at trace levels |
|  |  | PE-NMe(22:2(13Z,16Z)/18:3(9Z,12Z,15Z)) | [M+Na] <sup>+</sup> | 807.5778 | MonomethylPhosphatidylethanolamine - formed by methylation of Phosphatidylethanolamine as part of biosynthesis of Phosphatidylcholine. Usually found at trace levels |
|  |  | PE-NMe(22:1(13Z)/18:4(6Z,9Z,12Z,15Z))  | [M+Na] <sup>+</sup> | 807.5778 | MonomethylPhosphatidylethanolamine - formed by methylation of Phosphatidylethanolamine as part of biosynthesis of Phosphatidylcholine. Usually found at trace levels |

|  |  |                                        |                     |          |                                                                                                                                                                      |
|--|--|----------------------------------------|---------------------|----------|----------------------------------------------------------------------------------------------------------------------------------------------------------------------|
|  |  | PE-NMe(20:5(5Z,8Z,11Z,14Z,17Z)/20:0)   | [M+Na] <sup>+</sup> | 807.5778 | MonomethylPhosphatidylethanolamine - formed by methylation of Phosphatidylethanolamine as part of biosynthesis of Phosphatidylcholine. Usually found at trace levels |
|  |  | PE-NMe(20:4(8Z,11Z,14Z,17Z)/20:1(11Z)) | [M+Na] <sup>+</sup> | 807.5778 | MonomethylPhosphatidylethanolamine - formed by methylation of Phosphatidylethanolamine as part of biosynthesis of Phosphatidylcholine. Usually found at trace levels |
|  |  | PE-NMe(20:4(5Z,8Z,11Z,14Z)/20:1(11Z))  | [M+Na] <sup>+</sup> | 807.5778 | MonomethylPhosphatidylethanolamine - formed by methylation of Phosphatidylethanolamine as part of biosynthesis of Phosphatidylcholine. Usually found at trace levels |
|  |  | PE-NMe(20:1(11Z)/20:4(5Z,8Z,11Z,14Z))  | [M+Na] <sup>+</sup> | 807.5778 | MonomethylPhosphatidylethanolamine - formed by methylation of Phosphatidylethanolamine as part of biosynthesis of Phosphatidylcholine. Usually found at trace levels |
|  |  | PE-NMe(20:1(11Z)/20:4(8Z,11Z,14Z,17Z)) | [M+Na] <sup>+</sup> | 807.5778 | MonomethylPhosphatidylethanolamine - formed by methylation of Phosphatidylethanolamine as part of biosynthesis of Phosphatidylcholine. Usually found at trace levels |

|  |  |                                        |                     |          |                                                                                                                                                                      |
|--|--|----------------------------------------|---------------------|----------|----------------------------------------------------------------------------------------------------------------------------------------------------------------------|
|  |  | PE-NMe(20:0/20:5(5Z,8Z,11Z,14Z,17Z))   | [M+Na] <sup>+</sup> | 807.5778 | MonomethylPhosphatidylethanolamine - formed by methylation of Phosphatidylethanolamine as part of biosynthesis of Phosphatidylcholine. Usually found at trace levels |
|  |  | PE-NMe(18:4(6Z,9Z,12Z,15Z)/22:1(13Z))  | [M+Na] <sup>+</sup> | 807.5778 | MonomethylPhosphatidylethanolamine - formed by methylation of Phosphatidylethanolamine as part of biosynthesis of Phosphatidylcholine. Usually found at trace levels |
|  |  | PE-NMe(18:3(9Z,12Z,15Z)/22:2(13Z,16Z)) | [M+Na] <sup>+</sup> | 807.5778 | MonomethylPhosphatidylethanolamine - formed by methylation of Phosphatidylethanolamine as part of biosynthesis of Phosphatidylcholine. Usually found at trace levels |
|  |  | PE-NMe(18:3(6Z,9Z,12Z)/22:2(13Z,16Z))  | [M+Na] <sup>+</sup> | 807.5778 | MonomethylPhosphatidylethanolamine - formed by methylation of Phosphatidylethanolamine as part of biosynthesis of Phosphatidylcholine. Usually found at trace levels |
|  |  | PE-NMe(18:1(9Z)/22:4(7Z,10Z,13Z,16Z))  | [M+Na] <sup>+</sup> | 807.5778 | MonomethylPhosphatidylethanolamine - formed by methylation of Phosphatidylethanolamine as part of biosynthesis of Phosphatidylcholine. Usually found at trace levels |

|  |  |                                                   |                     |          |                                                                                                                                                                      |
|--|--|---------------------------------------------------|---------------------|----------|----------------------------------------------------------------------------------------------------------------------------------------------------------------------|
|  |  | PE-NMe(18:1(11Z)/22:4(7Z,10Z,13Z,16Z))            | [M+Na] <sup>+</sup> | 807.5778 | MonomethylPhosphatidylethanolamine - formed by methylation of Phosphatidylethanolamine as part of biosynthesis of Phosphatidylcholine. Usually found at trace levels |
|  |  | PE-NMe(18:0/22:5(7Z,10Z,13Z,16Z,19Z))             | [M+Na] <sup>+</sup> | 807.5778 | MonomethylPhosphatidylethanolamine - formed by methylation of Phosphatidylethanolamine as part of biosynthesis of Phosphatidylcholine. Usually found at trace levels |
|  |  | PE-NMe(18:0/22:5(4Z,7Z,10Z,13Z,16Z))              | [M+Na] <sup>+</sup> | 807.5778 | MonomethylPhosphatidylethanolamine - formed by methylation of Phosphatidylethanolamine as part of biosynthesis of Phosphatidylcholine. Usually found at trace levels |
|  |  | PE-NMe(22:6(4Z,7Z,10Z,13Z,16Z,19Z)/20:2(11Z,14Z)) | [M+H] <sup>+</sup>  | 829.5622 | MonomethylPhosphatidylethanolamine - formed by methylation of Phosphatidylethanolamine as part of biosynthesis of Phosphatidylcholine. Usually found at trace levels |
|  |  | PE-NMe(20:2(11Z,14Z)/22:6(4Z,7Z,10Z,13Z,16Z,19Z)) | [M+H] <sup>+</sup>  | 829.5622 | MonomethylPhosphatidylethanolamine - formed by methylation of Phosphatidylethanolamine as part of biosynthesis of Phosphatidylcholine. Usually found at trace levels |

|  |  |                                                   |                    |          |                                                                                                                                                                      |
|--|--|---------------------------------------------------|--------------------|----------|----------------------------------------------------------------------------------------------------------------------------------------------------------------------|
|  |  | PE-NMe(22:5(7Z,10Z,13Z,16Z,19Z)/20:3(8Z,11Z,14Z)) | [M+H] <sup>+</sup> | 829.5622 | MonomethylPhosphatidylethanolamine - formed by methylation of Phosphatidylethanolamine as part of biosynthesis of Phosphatidylcholine. Usually found at trace levels |
|  |  | PE-NMe(22:5(7Z,10Z,13Z,16Z,19Z)/20:3(5Z,8Z,11Z))  | [M+H] <sup>+</sup> | 829.5622 | MonomethylPhosphatidylethanolamine - formed by methylation of Phosphatidylethanolamine as part of biosynthesis of Phosphatidylcholine. Usually found at trace levels |
|  |  | PE-NMe(22:5(4Z,7Z,10Z,13Z,16Z)/20:3(5Z,8Z,11Z))   | [M+H] <sup>+</sup> | 829.5622 | MonomethylPhosphatidylethanolamine - formed by methylation of Phosphatidylethanolamine as part of biosynthesis of Phosphatidylcholine. Usually found at trace levels |
|  |  | PE-NMe(22:5(4Z,7Z,10Z,13Z,16Z)/20:3(8Z,11Z,14Z))  | [M+H] <sup>+</sup> | 829.5622 | MonomethylPhosphatidylethanolamine - formed by methylation of Phosphatidylethanolamine as part of biosynthesis of Phosphatidylcholine. Usually found at trace levels |
|  |  | PE-NMe(22:4(7Z,10Z,13Z,16Z)/20:4(8Z,11Z,14Z,17Z)) | [M+H] <sup>+</sup> | 829.5622 | MonomethylPhosphatidylethanolamine - formed by methylation of Phosphatidylethanolamine as part of biosynthesis of Phosphatidylcholine. Usually found at trace levels |

|  |  |                                                   |                    |          |                                                                                                                                                                      |
|--|--|---------------------------------------------------|--------------------|----------|----------------------------------------------------------------------------------------------------------------------------------------------------------------------|
|  |  | PE-NMe(22:4(7Z,10Z,13Z,16Z)/20:4(5Z,8Z,11Z,14Z))  | [M+H] <sup>+</sup> | 829.5622 | MonomethylPhosphatidylethanolamine - formed by methylation of Phosphatidylethanolamine as part of biosynthesis of Phosphatidylcholine. Usually found at trace levels |
|  |  | PE-NMe(20:4(8Z,11Z,14Z,17Z)/22:4(7Z,10Z,13Z,16Z)) | [M+H] <sup>+</sup> | 829.5622 | MonomethylPhosphatidylethanolamine - formed by methylation of Phosphatidylethanolamine as part of biosynthesis of Phosphatidylcholine. Usually found at trace levels |
|  |  | PE-NMe(20:4(5Z,8Z,11Z,14Z)/22:4(7Z,10Z,13Z,16Z))  | [M+H] <sup>+</sup> | 829.5622 | MonomethylPhosphatidylethanolamine - formed by methylation of Phosphatidylethanolamine as part of biosynthesis of Phosphatidylcholine. Usually found at trace levels |
|  |  | PE-NMe(20:3(8Z,11Z,14Z)/22:5(7Z,10Z,13Z,16Z,19Z)) | [M+H] <sup>+</sup> | 829.5622 | MonomethylPhosphatidylethanolamine - formed by methylation of Phosphatidylethanolamine as part of biosynthesis of Phosphatidylcholine. Usually found at trace levels |
|  |  | PE-NMe(20:3(8Z,11Z,14Z)/22:5(4Z,7Z,10Z,13Z,16Z))  | [M+H] <sup>+</sup> | 829.5622 | MonomethylPhosphatidylethanolamine - formed by methylation of Phosphatidylethanolamine as part of biosynthesis of Phosphatidylcholine. Usually found at trace levels |

|  |  |                                                  |                     |          |                                                                                                                                                                      |
|--|--|--------------------------------------------------|---------------------|----------|----------------------------------------------------------------------------------------------------------------------------------------------------------------------|
|  |  | PE-NMe(20:3(5Z,8Z,11Z)/22:5(7Z,10Z,13Z,16Z,19Z)) | [M+H] <sup>+</sup>  | 829.5622 | MonomethylPhosphatidylethanolamine - formed by methylation of Phosphatidylethanolamine as part of biosynthesis of Phosphatidylcholine. Usually found at trace levels |
|  |  | PE-NMe(20:3(5Z,8Z,11Z)/22:5(4Z,7Z,10Z,13Z,16Z))  | [M+H] <sup>+</sup>  | 829.5622 | MonomethylPhosphatidylethanolamine - formed by methylation of Phosphatidylethanolamine as part of biosynthesis of Phosphatidylcholine. Usually found at trace levels |
|  |  | PC(22:6(4Z,7Z,10Z,13Z,16Z,19Z)/18:2(9Z,12Z))     | [M+H] <sup>+</sup>  | 829.5622 | Phosphatidylcholine - signalling molecule on cell membrane                                                                                                           |
|  |  | PC(22:5(7Z,10Z,13Z,16Z,19Z)/18:3(9Z,12Z,15Z))    | [M+H] <sup>+</sup>  | 829.5622 | Phosphatidylcholine - signalling molecule on cell membrane                                                                                                           |
|  |  | PC(22:5(7Z,10Z,13Z,16Z,19Z)/18:3(6Z,9Z,12Z))     | [M+H] <sup>+</sup>  | 829.5622 | Phosphatidylcholine - signalling molecule on cell membrane                                                                                                           |
|  |  | PC(22:5(7Z,10Z,13Z,16Z,19Z)/16:0)                | [M+Na] <sup>+</sup> | 807.5778 | Phosphatidylcholine - signalling molecule on cell membrane                                                                                                           |
|  |  | PC(22:5(4Z,7Z,10Z,13Z,16Z)/18:3(6Z,9Z,12Z))      | [M+H] <sup>+</sup>  | 829.5622 | Phosphatidylcholine - signalling molecule on cell membrane                                                                                                           |
|  |  | PC(22:5(4Z,7Z,10Z,13Z,16Z)/18:3(9Z,12Z,15Z))     | [M+H] <sup>+</sup>  | 829.5622 | Phosphatidylcholine - signalling molecule on cell membrane                                                                                                           |
|  |  | PC(22:5(4Z,7Z,10Z,13Z,16Z)/16:0)                 | [M+Na] <sup>+</sup> | 807.5778 | Phosphatidylcholine - signalling molecule on cell membrane                                                                                                           |
|  |  | PC(22:4(7Z,10Z,13Z,16Z)/18:4(6Z,9Z,12Z,15Z))     | [M+H] <sup>+</sup>  | 829.5622 | Phosphatidylcholine - signalling molecule on cell membrane                                                                                                           |
|  |  | PC(22:4(7Z,10Z,13Z,16Z)/16:1(9Z))                | [M+Na] <sup>+</sup> | 807.5778 | Phosphatidylcholine - signalling molecule on cell membrane                                                                                                           |

|  |  |                                               |                     |          |                                                            |
|--|--|-----------------------------------------------|---------------------|----------|------------------------------------------------------------|
|  |  | PC(20:5(5Z,8Z,11Z,14Z,17Z)/20:3(5Z,8Z,11Z))   | [M+H] <sup>+</sup>  | 829.5622 | Phosphatidylcholine - signalling molecule on cell membrane |
|  |  | PC(20:5(5Z,8Z,11Z,14Z,17Z)/20:3(8Z,11Z,14Z))  | [M+H] <sup>+</sup>  | 829.5622 | Phosphatidylcholine - signalling molecule on cell membrane |
|  |  | PC(20:5(5Z,8Z,11Z,14Z,17Z)/18:0)              | [M+Na] <sup>+</sup> | 807.5778 | Phosphatidylcholine - signalling molecule on cell membrane |
|  |  | PC(20:4(8Z,11Z,14Z,17Z)/20:4(8Z,11Z,14Z,17Z)) | [M+H] <sup>+</sup>  | 829.5622 | Phosphatidylcholine - signalling molecule on cell membrane |
|  |  | PC(20:4(8Z,11Z,14Z,17Z)/20:4(5Z,8Z,11Z,14Z))  | [M+H] <sup>+</sup>  | 829.5622 | Phosphatidylcholine - signalling molecule on cell membrane |
|  |  | PC(20:4(8Z,11Z,14Z,17Z)/18:1(9Z))             | [M+Na] <sup>+</sup> | 807.5778 | Phosphatidylcholine - signalling molecule on cell membrane |
|  |  | PC(20:4(8Z,11Z,14Z,17Z)/18:1(11Z))            | [M+Na] <sup>+</sup> | 807.5778 | Phosphatidylcholine - signalling molecule on cell membrane |
|  |  | PC(20:4(5Z,8Z,11Z,14Z)/20:4(5Z,8Z,11Z,14Z))   | [M+H] <sup>+</sup>  | 829.5622 | Phosphatidylcholine - signalling molecule on cell membrane |
|  |  | PC(20:4(5Z,8Z,11Z,14Z)/20:4(8Z,11Z,14Z,17Z))  | [M+H] <sup>+</sup>  | 829.5622 | Phosphatidylcholine - signalling molecule on cell membrane |
|  |  | PC(20:4(5Z,8Z,11Z,14Z)/18:1(9Z))              | [M+Na] <sup>+</sup> | 807.5778 | Phosphatidylcholine - signalling molecule on cell membrane |
|  |  | PC(20:4(5Z,8Z,11Z,14Z)/18:1(11Z))             | [M+Na] <sup>+</sup> | 807.5778 | Phosphatidylcholine - signalling molecule on cell membrane |
|  |  | PC(20:3(8Z,11Z,14Z)/20:5(5Z,8Z,11Z,14Z,17Z))  | [M+H] <sup>+</sup>  | 829.5622 | Phosphatidylcholine - signalling molecule on cell membrane |
|  |  | PC(20:3(8Z,11Z,14Z)/18:2(9Z,12Z))             | [M+Na] <sup>+</sup> | 807.5778 | Phosphatidylcholine - signalling molecule on cell membrane |
|  |  | PC(20:3(5Z,8Z,11Z)/20:5(5Z,8Z,11Z,14Z,17Z))   | [M+H] <sup>+</sup>  | 829.5622 | Phosphatidylcholine - signalling molecule on cell membrane |
|  |  | PC(20:3(5Z,8Z,11Z)/18:2(9Z,12Z))              | [M+Na] <sup>+</sup> | 807.5778 | Phosphatidylcholine - signalling molecule on cell membrane |



|  |  |                                               |                     |          |                                                            |
|--|--|-----------------------------------------------|---------------------|----------|------------------------------------------------------------|
|  |  | PC(20:2(11Z,14Z)/18:3(6Z,9Z,12Z))             | [M+Na] <sup>+</sup> | 807.5778 | Phosphatidylcholine - signalling molecule on cell membrane |
|  |  | PC(20:2(11Z,14Z)/18:3(9Z,12Z,15Z))            | [M+Na] <sup>+</sup> | 807.5778 | Phosphatidylcholine - signalling molecule on cell membrane |
|  |  | PC(20:1(11Z)/18:4(6Z,9Z,12Z,15Z))             | [M+Na] <sup>+</sup> | 807.5778 | Phosphatidylcholine - signalling molecule on cell membrane |
|  |  | PC(18:4(6Z,9Z,12Z,15Z)/22:4(7Z,10Z,13Z,16Z))  | [M+H] <sup>+</sup>  | 829.5622 | Phosphatidylcholine - signalling molecule on cell membrane |
|  |  | PC(18:4(6Z,9Z,12Z,15Z)/20:1(11Z))             | [M+Na] <sup>+</sup> | 807.5778 | Phosphatidylcholine - signalling molecule on cell membrane |
|  |  | PC(18:3(9Z,12Z,15Z)/22:5(7Z,10Z,13Z,16Z,19Z)) | [M+H] <sup>+</sup>  | 829.5622 | Phosphatidylcholine - signalling molecule on cell membrane |
|  |  | PC(18:3(9Z,12Z,15Z)/22:5(4Z,7Z,10Z,13Z,16Z))  | [M+H] <sup>+</sup>  | 829.5622 | Phosphatidylcholine - signalling molecule on cell membrane |
|  |  | PC(18:3(9Z,12Z,15Z)/20:2(11Z,14Z))            | [M+Na] <sup>+</sup> | 807.5778 | Phosphatidylcholine - signalling molecule on cell membrane |
|  |  | PC(18:3(6Z,9Z,12Z)/22:5(4Z,7Z,10Z,13Z,16Z))   | [M+H] <sup>+</sup>  | 829.5622 | Phosphatidylcholine - signalling molecule on cell membrane |
|  |  | PC(18:3(6Z,9Z,12Z)/22:5(7Z,10Z,13Z,16Z,19Z))  | [M+H] <sup>+</sup>  | 829.5622 | Phosphatidylcholine - signalling molecule on cell membrane |
|  |  | PC(18:3(6Z,9Z,12Z)/20:2(11Z,14Z))             | [M+Na] <sup>+</sup> | 807.5778 | Phosphatidylcholine - signalling molecule on cell membrane |
|  |  | PC(18:2(9Z,12Z)/22:6(4Z,7Z,10Z,13Z,16Z,19Z))  | [M+H] <sup>+</sup>  | 829.5622 | Phosphatidylcholine - signalling molecule on cell membrane |
|  |  | PC(18:2(9Z,12Z)/20:3(8Z,11Z,14Z))             | [M+Na] <sup>+</sup> | 807.5778 | Phosphatidylcholine - signalling molecule on cell membrane |
|  |  | PC(18:2(9Z,12Z)/20:3(5Z,8Z,11Z))              | [M+Na] <sup>+</sup> | 807.5778 | Phosphatidylcholine - signalling molecule on cell membrane |
|  |  | PC(18:1(9Z)/20:4(5Z,8Z,11Z,14Z))              | [M+Na] <sup>+</sup> | 807.5778 | Phosphatidylcholine - signalling molecule on cell membrane |

|          |       |                                            |                     |          |                                                                                                                                                                                                                                                                                                                       |
|----------|-------|--------------------------------------------|---------------------|----------|-----------------------------------------------------------------------------------------------------------------------------------------------------------------------------------------------------------------------------------------------------------------------------------------------------------------------|
|          |       | PC(18:1(9Z)/20:4(8Z,11Z,14Z,17Z))          | [M+Na] <sup>+</sup> | 807.5778 | Phosphatidylcholine - signalling molecule on cell membrane                                                                                                                                                                                                                                                            |
|          |       | PC(18:1(11Z)/20:4(5Z,8Z,11Z,14Z))          | [M+Na] <sup>+</sup> | 807.5778 | Phosphatidylcholine - signalling molecule on cell membrane                                                                                                                                                                                                                                                            |
|          |       | PC(18:1(11Z)/20:4(8Z,11Z,14Z,17Z))         | [M+Na] <sup>+</sup> | 807.5778 | Phosphatidylcholine - signalling molecule on cell membrane                                                                                                                                                                                                                                                            |
|          |       | PC(18:0/20:5(5Z,8Z,11Z,14Z,17Z))           | [M+Na] <sup>+</sup> | 807.5778 | Phosphatidylcholine - signalling molecule on cell membrane                                                                                                                                                                                                                                                            |
|          |       | PC(16:1(9Z)/22:4(7Z,10Z,13Z,16Z))          | [M+Na] <sup>+</sup> | 807.5778 | Phosphatidylcholine - signalling molecule on cell membrane                                                                                                                                                                                                                                                            |
|          |       | PC(16:0/22:5(4Z,7Z,10Z,13Z,16Z))           | [M+Na] <sup>+</sup> | 807.5778 | Phosphatidylcholine - signalling molecule on cell membrane                                                                                                                                                                                                                                                            |
|          |       | PC(16:0/22:5(7Z,10Z,13Z,16Z,19Z))          | [M+Na] <sup>+</sup> | 807.5778 | Phosphatidylcholine - signalling molecule on cell membrane                                                                                                                                                                                                                                                            |
| 769.4224 | 21.08 | PG(20:4(8Z,11Z,14Z,17Z)-2OH(5S,6R)/i-12:0) | [M+Na] <sup>+</sup> | 746.4370 | Oxidized phosphatidylglycerol                                                                                                                                                                                                                                                                                         |
|          |       | PG(i-12:0/20:4(8Z,11Z,14Z,17Z)-2OH(5S,6R)) | [M+Na] <sup>+</sup> | 746.4370 | Oxidized phosphatidylglycerol                                                                                                                                                                                                                                                                                         |
|          |       | PG(20:4(6E,8Z,11Z,13E)-2OH(5S,15S)/i-12:0) | [M+Na] <sup>+</sup> | 746.4370 | Oxidized phosphatidylglycerol                                                                                                                                                                                                                                                                                         |
|          |       | PG(i-12:0/20:4(6E,8Z,11Z,13E)-2OH(5S,15S)) | [M+Na] <sup>+</sup> | 746.4370 | Oxidized phosphatidylglycerol                                                                                                                                                                                                                                                                                         |
|          |       | PG(20:4(6Z,8E,10E,14Z)-2OH(5S,12R)/i-12:0) | [M+Na] <sup>+</sup> | 746.4370 | Oxidized phosphatidylglycerol                                                                                                                                                                                                                                                                                         |
|          |       | PG(i-12:0/20:4(6Z,8E,10E,14Z)-2OH(5S,12R)) | [M+Na] <sup>+</sup> | 746.4370 | Oxidized phosphatidylglycerol                                                                                                                                                                                                                                                                                         |
| 188.0707 | 2.35  | Indoleacrylic acid                         | [M+H] <sup>+</sup>  | 187.0633 | Best known as plant growth hormone, biological role in animals less known. Some evidence that it promotes interstitial epithelial barrier function and mitigates inflammatory responses. Stimulating this compound could potentially have a therapeutic effect. Related compound (indolylacryloylglucine) is excreted |

|          |       |                                                |                     |          |                                                                                                                                                                                        |
|----------|-------|------------------------------------------------|---------------------|----------|----------------------------------------------------------------------------------------------------------------------------------------------------------------------------------------|
|          |       |                                                |                     |          | more in some myopathies (e.g., Duchenne muscular dystrophy)                                                                                                                            |
| 229.1433 | 5.30  | dodec-6-enedioic acid                          | [M+H] <sup>+</sup>  | 228.1362 | Medium-chain fatty acid                                                                                                                                                                |
|          |       | dodec-4-enedioic acid                          | [M+H] <sup>+</sup>  | 228.1362 | Medium-chain fatty acid                                                                                                                                                                |
|          |       | dodec-5-enedioic acid                          | [M+H] <sup>+</sup>  | 228.1362 | Medium-chain fatty acid                                                                                                                                                                |
|          |       | dodec-2-enedioic acid                          | [M+H] <sup>+</sup>  | 228.1362 | Medium-chain fatty acid                                                                                                                                                                |
|          |       | dodec-3-enedioic acid                          | [M+H] <sup>+</sup>  | 228.1362 | Medium-chain fatty acid                                                                                                                                                                |
| 813.6839 | 21.40 | SM(d18:2(4E,14Z)/24:0)                         | [M+H] <sup>+</sup>  | 812.6771 | Sphingomyelin - in cell membranes, especially the myelin sheath on nerve cell axons. Play a role in signal transduction, accumulated in Niemann-Pick Disease (rare hereditary disease) |
|          |       | SM(d18:1/24:1(15Z))                            | [M+H] <sup>+</sup>  | 812.6771 | Sphingomyelin - in cell membranes, especially the myelin sheath on nerve cell axons. Play a role in signal transduction, accumulated in Niemann-Pick Disease (rare hereditary disease) |
| 377.2659 | 13.29 | Glyceryl monolinoleate                         | [M+Na] <sup>+</sup> | 354.2770 | Lineolic acids and derivatives                                                                                                                                                         |
| 343.2241 | 11.17 | 11,12-Epoxyeicosatrienoic acid                 | [M+Na] <sup>+</sup> | 320.2351 | Epoxyeicosatrienoic acid – Formation enhanced by induction of CYP2C8 in native coronary artery endothelial cells by beta-naphthoflavone                                                |
|          |       | 8-hydroxy-5Z,9E,11Z,14Z-eicosatetraenoic acid  | [M+Na] <sup>+</sup> | 320.2351 | Hydroxyeicosatetraenoic acids                                                                                                                                                          |
|          |       | 7-HETE                                         | [M+Na] <sup>+</sup> | 320.2351 | Hydroxyeicosatetraenoic acids                                                                                                                                                          |
|          |       | 18-Hydroxy-5Z,8Z,11Z,14Z-eicosatetraenoic acid | [M+Na] <sup>+</sup> | 320.2351 | Hydroxyeicosatetraenoic acids                                                                                                                                                          |

|  |  |                                                 |                     |          |                                                                                                                                                                                                                                                                                                                                                                                                                                                                                                                                                                                                                              |
|--|--|-------------------------------------------------|---------------------|----------|------------------------------------------------------------------------------------------------------------------------------------------------------------------------------------------------------------------------------------------------------------------------------------------------------------------------------------------------------------------------------------------------------------------------------------------------------------------------------------------------------------------------------------------------------------------------------------------------------------------------------|
|  |  | 15R-hydroxy-5Z,8Z,11Z,13E-eicosatetraenoic acid | [M+Na] <sup>+</sup> | 320.2351 | Hydroxyeicosatetraenoic acids                                                                                                                                                                                                                                                                                                                                                                                                                                                                                                                                                                                                |
|  |  | 12S-hydroxy-5E,8Z,10Z,14Z-eicosatetraenoic acid | [M+Na] <sup>+</sup> | 320.2351 | Hydroxyeicosatetraenoic acids                                                                                                                                                                                                                                                                                                                                                                                                                                                                                                                                                                                                |
|  |  | 12-HETE                                         | [M+Na] <sup>+</sup> | 320.2351 | Eicosanoid – 5-lipoxygenase metabolite of arachidonic acid. Associated with pathogenesis of hypertension and may mediate angiotensin II and TGFbeta induced mesangial cell abnormality in diabetic nephropathy. Elevated in psoriatic lesions. Vasoconstrictor Eicosanoid. 12-HETE is a neuromodulator that is synthesized during ischemia. Its neuronal effects include attenuation of calcium influx and glutamate release as well as inhibition of AMPA receptor (AMPA-R) activation. 12-HETE is found to be associated with peroxisomal biogenesis defect and Zellweger syndrome, which are inborn errors of metabolism. |
|  |  | 12 Hydroxy arachidonic acid                     | [M+Na] <sup>+</sup> | 320.2351 | Long chain fatty acid                                                                                                                                                                                                                                                                                                                                                                                                                                                                                                                                                                                                        |
|  |  | 17-HETE                                         | [M+Na] <sup>+</sup> | 320.2351 | Cytochrome P450 metabolite of arachidonic acid – Stereospecific effects on sodium transport in the kidney                                                                                                                                                                                                                                                                                                                                                                                                                                                                                                                    |
|  |  | 13-HETE                                         | [M+Na] <sup>+</sup> | 320.2351 | One of main metabolites of 15-lipoxygenases. Inhibit cell proliferation and induce apoptosis                                                                                                                                                                                                                                                                                                                                                                                                                                                                                                                                 |

|  |  |                                 |                     |          |                                                                                                                                                                                                                                                                          |
|--|--|---------------------------------|---------------------|----------|--------------------------------------------------------------------------------------------------------------------------------------------------------------------------------------------------------------------------------------------------------------------------|
|  |  |                                 |                     |          | in several human cancer.<br>Arachidonic acid metabolite in rat                                                                                                                                                                                                           |
|  |  | 10-HETE                         | [M+Na] <sup>+</sup> | 320.2351 | Hydroxyeicosatetraenoic acid –<br>Omega-hydroxy derivatives. One of<br>major products of NADPH-<br>dependent arachidonic acid<br>metabolism in rat liver microsomes                                                                                                      |
|  |  | 19(S)-HETE                      | [M+Na] <sup>+</sup> | 320.2351 | Hydroxyeicosatetraenoic acids                                                                                                                                                                                                                                            |
|  |  | 5-HETE                          | [M+Na] <sup>+</sup> | 320.2351 | Hydroxyeicosatetraenoic acids –<br>Eicosanoid. Intermediate in<br>arachidonic acid metabolism via<br>glutathione peroxidase. Involved in<br>pathway of leukotriene synthesis.<br>Modulator of tubuloglomerular<br>feedback                                               |
|  |  | 9-HETE                          | [M+Na] <sup>+</sup> | 320.2351 | Hydroxyeicosatetraenoic acids                                                                                                                                                                                                                                            |
|  |  | 18-Hydroxyarachidonic acid      | [M+Na] <sup>+</sup> | 320.2351 | Substrate for CYP4F8 or Leukotriene<br>B4 20-monooxygenase. Enzymes<br>irreversibly hydroxylates<br>arachidonic acid to (18R)-<br>hydroxyarachidonate in<br>endoplasmic reticulum. Is<br>intermediate in Eicosanoid<br>metabolism                                        |
|  |  | 20-Hydroxyeicosatetraenoic acid | [M+Na] <sup>+</sup> | 320.2351 | Metabolite of arachidonic acid.<br>Potent constrictor of renal, cerebral,<br>mesenteric arteries. Involved with<br>activation of protein kinase, Rho<br>kinase, MAP kinase pathway.<br>Increases intracellular Ca <sup>2+</sup> via<br>depolarization of vascular smooth |

|  |  |            |                            |          |                                                                                                                                                                                                                                                                                                                                                                                                                                                                                                                                                                                                                                                                                                                              |
|--|--|------------|----------------------------|----------|------------------------------------------------------------------------------------------------------------------------------------------------------------------------------------------------------------------------------------------------------------------------------------------------------------------------------------------------------------------------------------------------------------------------------------------------------------------------------------------------------------------------------------------------------------------------------------------------------------------------------------------------------------------------------------------------------------------------------|
|  |  |            |                            |          | muscle membrane secondary to blocking the large-conductance $\text{Ca}^{2+}$ -activated $\text{K}^{+}$ -channels and by direct effect on L-type Ca channels. Elevations in the production of 20-HETE mediate the myogenic response of skeletal, renal, and cerebral arteries to elevations in transmural pressure. There is an important interaction between nitric oxide (NO) and the formation of 20-HETE production. NO inhibits the formation of 20-HETE formation in renal and cerebral arteries. A fall in levels of 20-HETE contributes to the cyclic GMP-independent dilator effect of NO to activate the large-conductance $\text{Ca}^{2+}$ -activated $\text{K}^{+}$ -channels and to dilate the cerebral arteries |
|  |  | 11(R)-HETE | $[\text{M}+\text{Na}]^{+}$ | 320.2351 | Produced from arachidonic acid via COX-1 and COX-2. Secreted by endothelial cells to potentially influence vascular tone, leukocyte function, platelet aggregation                                                                                                                                                                                                                                                                                                                                                                                                                                                                                                                                                           |
|  |  | 8-HETE     | $[\text{M}+\text{Na}]^{+}$ | 320.2351 | Hydroxyeicosatetraenoic acid Eicosanoid. Strong activator of peroxisome proliferator-activated receptors (PPARs) alpha and weak activator of PPAR gamma. Able to                                                                                                                                                                                                                                                                                                                                                                                                                                                                                                                                                             |

|  |  |                                        |                     |          |                                                                                                                                                                                                                                                                                                                                                                                                                                                                                                                                                                                                                                   |
|--|--|----------------------------------------|---------------------|----------|-----------------------------------------------------------------------------------------------------------------------------------------------------------------------------------------------------------------------------------------------------------------------------------------------------------------------------------------------------------------------------------------------------------------------------------------------------------------------------------------------------------------------------------------------------------------------------------------------------------------------------------|
|  |  |                                        |                     |          | induce differentiation of preadipocytes                                                                                                                                                                                                                                                                                                                                                                                                                                                                                                                                                                                           |
|  |  | 16(R)-HETE                             | [M+Na] <sup>+</sup> | 320.2351 | Metabolite of arachidonic acid, metabolized by the enzyme Cytochrome P450, family 2, subfamily C. Endogenous lipidic inhibitor of human neutrophil inhibitor of adhesion and aggregation activity. Human polymorphonuclear leukocytes (PMNs) produce 16(R)-HETE that modulates their function                                                                                                                                                                                                                                                                                                                                     |
|  |  | 14,15-Epoxy-5,8,11-eicosatrienoic acid | [M+Na] <sup>+</sup> | 320.2351 | Epoxyeicosatrienoic acid (EET), a metabolite of arachidonic acid                                                                                                                                                                                                                                                                                                                                                                                                                                                                                                                                                                  |
|  |  | 15-HETE                                | [M+Na] <sup>+</sup> | 320.2351 | Hydroxyeicosatetraenoic acids. Antiinflammatory capacities. In vitro, 15-HETE has been shown to inhibit LTB <sub>4</sub> formation, 12-HETE formation, and specifically inhibits the neutrophil chemotactic effect of LTB <sub>4</sub> . 15-HETE inhibits LTB <sub>4</sub> -induced erythema and edema, and reduces LTB <sub>4</sub> in the synovial fluid of carrageenan-induced experimental arthritis in dogs. 15-HETE also has some immunomodulatory effects. It inhibits the mixed lymphocyte reaction, induces generation of murine cytotoxic suppressor T cells, and it decreases interferon production by murine lymphoma |

|          |      |                                        |                                   |          |                                                                                                                                                                                                                                                                                                                                                                                                       |
|----------|------|----------------------------------------|-----------------------------------|----------|-------------------------------------------------------------------------------------------------------------------------------------------------------------------------------------------------------------------------------------------------------------------------------------------------------------------------------------------------------------------------------------------------------|
| 202.1437 | 3.85 |                                        |                                   |          | cells. 15(S)-HETE is found to be associated with Zellweger syndrome, which is an inborn error of metabolism.                                                                                                                                                                                                                                                                                          |
|          |      | 14R,15S-EpETrE                         | [M+Na] <sup>+</sup>               | 320.2351 | Dominant extracellular metabolite of epoxygenase products of arachidonic acid released from human luteinised granulosa cells                                                                                                                                                                                                                                                                          |
|          |      | 8,9-Epoxyeicosatrienoic acid           | [M+Na] <sup>+</sup>               | 320.2351 | Epoxyeicosatrienoic acid Eicosanoid, a metabolite of arachidonic acid                                                                                                                                                                                                                                                                                                                                 |
|          |      | 5,6-Epoxy-8,11,14-eicosatrienoic acid  | [M+Na] <sup>+</sup>               | 320.2351 | Epoxyeicosatrienoic acid Eicosanoid, a metabolite of arachidonic acid                                                                                                                                                                                                                                                                                                                                 |
|          | 3.85 | (5Z,7E)-3-hydroxydeca-5,7-dienoic acid | [M+NH <sub>4</sub> ] <sup>+</sup> | 184.1099 | Medium chain-hydroxy fatty acid                                                                                                                                                                                                                                                                                                                                                                       |
|          |      | (4E,7E)-3-hydroxydeca-4,7-dienoic acid | [M+NH <sub>4</sub> ] <sup>+</sup> | 184.1099 | Medium chain-hydroxy fatty acid                                                                                                                                                                                                                                                                                                                                                                       |
|          |      | (6Z,8E)-3-hydroxydeca-6,8-dienoic acid | [M+NH <sub>4</sub> ] <sup>+</sup> | 184.1099 | Medium chain-hydroxy fatty acid                                                                                                                                                                                                                                                                                                                                                                       |
|          |      | (4E,6Z)-3-hydroxydeca-4,6-dienoic acid | [M+NH <sub>4</sub> ] <sup>+</sup> | 184.1099 | Medium chain-hydroxy fatty acid                                                                                                                                                                                                                                                                                                                                                                       |
|          |      | N-Acetylaminooctanoic acid             | [M+H] <sup>+</sup>                | 201.1365 | N-acyl-alpha amino acids                                                                                                                                                                                                                                                                                                                                                                              |
|          |      | (E)-10-Oxo-8-decenoic acid             | [M+NH <sub>4</sub> ] <sup>+</sup> | 184.1099 | Medium chain fatty acid                                                                                                                                                                                                                                                                                                                                                                               |
|          |      | Capryloylglycine                       | [M+H] <sup>+</sup>                | 201.1365 | Type of acylglycine - normally minor metabolites of fatty acids. Excretion of certain acylglycines is increased in several inborn errors of metabolism. In certain cases, the measurement of these metabolites in body fluids can be used to diagnose disorders associated with mitochondrial fatty acid beta-oxidation, including medium-chain acyl-coenzyme A (CoA) dehydrogenase (MCAD) deficiency |



|          |       |                                             |                                   |          |                                                                                                                                   |
|----------|-------|---------------------------------------------|-----------------------------------|----------|-----------------------------------------------------------------------------------------------------------------------------------|
|          |       |                                             |                                   |          | and multiple acyl-CoA dehydrogenation defect (MAD)                                                                                |
| 313.1619 | 4.90  | 1-Octen-3-yl glucoside                      | [M+Na] <sup>+</sup>               | 290.1729 | Fatty acyl glycosides of mono- and disaccharides                                                                                  |
| 415.2818 | 11.04 | 3beta,12beta-Dihydroxy-5beta-cholanoic acid | [M+Na] <sup>+</sup>               | 392.2927 | Bile acid                                                                                                                         |
|          |       | Isodeoxycholic acid                         | [M+Na] <sup>+</sup>               | 392.2927 | Human fecal bile acid                                                                                                             |
|          |       | 7a,12b-dihydroxy-5b-Cholan-24-oic acid      | [M+Na] <sup>+</sup>               | 392.2927 | Bile acid                                                                                                                         |
|          |       | 7b,12a-Dihydroxycholanoic acid              | [M+Na] <sup>+</sup>               | 392.2927 | Bile acid                                                                                                                         |
|          |       | Murocholic acid                             | [M+Na] <sup>+</sup>               | 392.2927 | Bile acid                                                                                                                         |
|          |       | Hyodeoxycholic acid                         | [M+Na] <sup>+</sup>               | 392.2927 | Bile acid                                                                                                                         |
|          |       | Isoursodeoxycholic acid                     | [M+Na] <sup>+</sup>               | 392.2927 | Bile acid                                                                                                                         |
|          |       | Isohyodeoxycholic acid                      | [M+Na] <sup>+</sup>               | 392.2927 | Bile acid                                                                                                                         |
|          |       | Deoxycholic acid                            | [M+Na] <sup>+</sup>               | 392.2927 | Secondary bile acid                                                                                                               |
|          |       | Allochenodeoxycholic acid                   | [M+Na] <sup>+</sup>               | 392.2927 | Bile acid                                                                                                                         |
|          |       | Chenodeoxycholic acid                       | [M+Na] <sup>+</sup>               | 392.2927 | Bile acid                                                                                                                         |
|          |       | Allodeoxycholic acid                        | [M+Na] <sup>+</sup>               | 392.2927 | Bile acid                                                                                                                         |
|          |       | 3b,12a-Dihydroxy-5b-cholanoic acid          | [M+Na] <sup>+</sup>               | 392.2927 | Bile acid                                                                                                                         |
|          |       | 3a,12b-Dihydroxy-5b-cholanoic acid          | [M+Na] <sup>+</sup>               | 392.2927 | Bile acid                                                                                                                         |
|          |       | 3a,7a-Dihydroxycholanoic acid               | [M+Na] <sup>+</sup>               | 392.2927 | chenodeoxycholic or bile acid present in human blood serum and in the biliary excretion of patients with choledochostomy drainage |
|          |       | 3b,7a-Dihydroxy-5b-cholanoic acid           | [M+Na] <sup>+</sup>               | 392.2927 | Bile acid                                                                                                                         |
|          |       | 3b,12a-Dihydroxy-5a-cholanoic acid          | [M+Na] <sup>+</sup>               | 392.2927 | Bile acid                                                                                                                         |
| 415.2818 | 11.04 | Ursodeoxycholic acid                        | [M+Na] <sup>+</sup>               | 392.2927 | Dihydroxy bile acids, alcohols and derivatives                                                                                    |
| 424.3419 | 9.86  | O-Linoleoylcarnitine                        | [M+H] <sup>+</sup>                | 423.3349 | Acylcarnitine                                                                                                                     |
|          |       | MG(22:4(7Z,10Z,13Z,16Z)/0:0/0:0)            | [M+NH <sub>4</sub> ] <sup>+</sup> | 406.3083 | monoacylglycerol - formed biochemically via release of a fatty acid from diacylglycerol by                                        |

|          |      |                                          |                                   |          |                                                                                                                                                                                                                                                                                                                                     |
|----------|------|------------------------------------------|-----------------------------------|----------|-------------------------------------------------------------------------------------------------------------------------------------------------------------------------------------------------------------------------------------------------------------------------------------------------------------------------------------|
|          |      |                                          |                                   |          | diacylglycerol lipase or hormone sensitive lipase, also added to food so potential exposome                                                                                                                                                                                                                                         |
|          |      | MG(0:0/22:4(7Z,10Z,13Z,16Z)/0:0)         | [M+NH <sub>4</sub> ] <sup>+</sup> | 406.3083 | monoacylglycerol - formed biochemically via release of a fatty acid from diacylglycerol by diacylglycerol lipase or hormone sensitive lipase, also added to food so potential exposome                                                                                                                                              |
|          |      | Linoleyl carnitine                       | [M+H] <sup>+</sup>                | 423.3349 | Long-chain acyl fatty acid derivative of carnitine. Long-chain acyl fatty acid derivatives accumulate in the cytosol and serum of patients suffering of mitochondrial carnitine palmitoyltransferase II deficiency. Linoleyl carnitine is found to be associated with glutaric aciduria II, which is an inborn error of metabolism. |
| 668.5443 | 8.65 | DG(20:3(8Z,11Z,14Z)-2OH(5,6)/0:0/i-16:0) | [M+NH <sub>4</sub> ] <sup>+</sup> | 650.5122 | Diacylglycerols- glycerolipids containing a common glycerol backbone with at least one fatty acyl group esterified. Involved in the phospholipid metabolic pathway                                                                                                                                                                  |
|          |      | DG(i-16:0/0:0/20:3(8Z,11Z,14Z)-2OH(5,6)) | [M+NH <sub>4</sub> ] <sup>+</sup> | 650.5122 | Diacylglycerols- glycerolipids containing a common glycerol backbone with at least one fatty acyl group esterified. Involved in the phospholipid metabolic pathway                                                                                                                                                                  |
|          |      | DG(20:3(8Z,11Z,14Z)-2OH(5,6)/i-16:0/0:0) | [M+NH <sub>4</sub> ] <sup>+</sup> | 650.5122 | Diacylglycerols- glycerolipids containing a common glycerol                                                                                                                                                                                                                                                                         |

|          |      |                                          |                                   |          |                                                                                                                                                                    |
|----------|------|------------------------------------------|-----------------------------------|----------|--------------------------------------------------------------------------------------------------------------------------------------------------------------------|
|          |      |                                          |                                   |          | backbone with at least one fatty acyl group esterified. Involved in the phospholipid metabolic pathway                                                             |
|          |      | DG(i-16:0/20:3(8Z,11Z,14Z)-2OH(5,6)/0:0) | [M+NH <sub>4</sub> ] <sup>+</sup> | 650.5122 | Diacylglycerols- glycerolipids containing a common glycerol backbone with at least one fatty acyl group esterified. Involved in the phospholipid metabolic pathway |
|          |      | DG(20:3(8Z,11Z,14Z)-2OH(5,6)/0:0/16:0)   | [M+NH <sub>4</sub> ] <sup>+</sup> | 650.5122 | Diacylglycerols- glycerolipids containing a common glycerol backbone with at least one fatty acyl group esterified. Involved in the phospholipid metabolic pathway |
|          |      | DG(16:0/0:0/20:3(8Z,11Z,14Z)-2OH(5,6))   | [M+NH <sub>4</sub> ] <sup>+</sup> | 650.5122 | Diacylglycerols- glycerolipids containing a common glycerol backbone with at least one fatty acyl group esterified. Involved in the phospholipid metabolic pathway |
|          |      | DG(20:3(8Z,11Z,14Z)-2OH(5,6)/16:0/0:0)   | [M+NH <sub>4</sub> ] <sup>+</sup> | 650.5122 | Diacylglycerols- glycerolipids containing a common glycerol backbone with at least one fatty acyl group esterified. Involved in the phospholipid metabolic pathway |
|          |      | DG(16:0/20:3(8Z,11Z,14Z)-2OH(5,6)/0:0)   | [M+NH <sub>4</sub> ] <sup>+</sup> | 650.5122 | Diacylglycerols- glycerolipids containing a common glycerol backbone with at least one fatty acyl group esterified. Involved in the phospholipid metabolic pathway |
|          |      |                                          |                                   |          |                                                                                                                                                                    |
| 269.1357 | 5.45 | 5'-Deoxyadenosine                        | [M+NH <sub>4</sub> ] <sup>+</sup> | 251.1018 | Oxidized nucleoside                                                                                                                                                |
|          |      | 3-Hydroxydodecanedioic acid              | [M+Na] <sup>+</sup>               | 246.1467 | Medium-chain hydroxy acids                                                                                                                                         |

|          |      |                                  |                                   |          |                                                                                                                                                                                                                                                                                                 |
|----------|------|----------------------------------|-----------------------------------|----------|-------------------------------------------------------------------------------------------------------------------------------------------------------------------------------------------------------------------------------------------------------------------------------------------------|
|          |      | Deoxyadenosine                   | [M+NH <sub>4</sub> ] <sup>+</sup> | 251.1018 | Derivative of nucleoside adenosine -<br>Chronically high levels of<br>deoxyadenosine are associated with<br>adenosine deaminase (ADA)<br>deficiency, an inborn error of<br>metabolism. The main symptoms of<br>ADA deficiency are pneumonia,<br>chronic diarrhea, and widespread<br>skin rashes |
| 320.2429 | 6.63 | xi-8-Hydroxyhexadecanedioic acid | [M+NH <sub>4</sub> ] <sup>+</sup> | 302.2093 | Long-chain fatty acids                                                                                                                                                                                                                                                                          |
|          |      | xi-7-Hydroxyhexadecanedioic acid | [M+NH <sub>4</sub> ] <sup>+</sup> | 302.2093 | Long-chain fatty acids                                                                                                                                                                                                                                                                          |

Table S8: Complete List of Tentatively Identified Exogenous Metabolites in Low vs. Moderate Models

| m/z      | RT    | Tentative ID                                                                           | Adduct                            | Monoisotopic Mass | Biological Significance                                                                                             |
|----------|-------|----------------------------------------------------------------------------------------|-----------------------------------|-------------------|---------------------------------------------------------------------------------------------------------------------|
| 415.2536 | 3.97  | Methyl N-((2s,3s)-3-[(Propylamino)carbonyl]oxiran-2-yl)carbonyl)-L-Isoleucyl-L-Proline | [M+NH <sub>4</sub> ] <sup>+</sup> | 397.2213          | Peptides                                                                                                            |
| 116.0821 | 0.56  | 1-Nitrosopiperazine                                                                    | [M+H] <sup>+</sup>                | 115.0746          | Piperazines                                                                                                         |
|          |       | 4-Hydroxymethylpyrazole                                                                | [M+NH <sub>4</sub> ] <sup>+</sup> | 98.0480           | Pyrazoles – Used alone or in combination with hemodialysis. Used as antidote for methanol/ethylene glycol poisoning |
| 239.9939 | 0.67  | 2-Aminophenol N-formate sulfate                                                        | [M+Na] <sup>+</sup>               | 217.0045          | Bacterial metabolite                                                                                                |
| 391.1877 | 9.86  | Sepimostat                                                                             | [M+NH <sub>4</sub> ] <sup>+</sup> | 373.1539          | Naphthalenes                                                                                                        |
|          |       | N-(4-(4-Methyl-1-piperazinyl)phenyl)-9-acridinamine                                    | [M+Na] <sup>+</sup>               | 368.2001          | Acridines                                                                                                           |
|          |       | Clebopride                                                                             | [M+NH <sub>4</sub> ] <sup>+</sup> | 373.1557          | N-benzylpiperidines                                                                                                 |
| 524.3710 | 14.21 | Anadur                                                                                 | [M+NH <sub>4</sub> ] <sup>+</sup> | 506.3396          | Steroid esters                                                                                                      |
|          |       | 2-LysoPhosphatidylcholine                                                              | [M+H] <sup>+</sup>                | 523.3638          | 1-acyl-sn-glycero-3-phosphocholines                                                                                 |
| 251.1430 | 9.04  | Non-sulfonylurea                                                                       | [M+H] <sup>+</sup>                | 250.1351          | Sulfonylureas                                                                                                       |
| 263.0887 | 6.70  | Isopropyl 3-(3,4-dihydroxyphenyl)-2-hydroxypropanoate                                  | [M+Na] <sup>+</sup>               | 240.0998          | Catechols                                                                                                           |
|          |       | Ethyl 3,4,5-trimethoxybenzoate                                                         | [M+Na] <sup>+</sup>               | 240.0998          | Gallic acid and derivatives                                                                                         |
|          |       | L-beta-aspartyl-L-glutamic acid                                                        | [M+H] <sup>+</sup>                | 262.0801          | Hybrid peptides – Found in anatidaes, chicken, pigs                                                                 |
|          |       | 3-(3,4,5-Trimethoxyphenyl)propanoic acid                                               | [M+Na] <sup>+</sup>               | 240.0998          | Phenylpropanoic acids                                                                                               |

|          |       |                                                       |                                   |          |                                                                                                                                                                                                                                          |
|----------|-------|-------------------------------------------------------|-----------------------------------|----------|------------------------------------------------------------------------------------------------------------------------------------------------------------------------------------------------------------------------------------------|
| 188.0707 | 2.35  | 6-Chloro-N-(1-methylethyl)-1,3,5-triazine-2,4-diamine | [M+H] <sup>+</sup>                | 187.0625 | 1,3,5-triazine-2,4-diamines – Primary metabolites                                                                                                                                                                                        |
| 549.1857 | 16.38 | Neoacrimarine F                                       | [M+NH <sub>4</sub> ] <sup>+</sup> | 531.1529 | Triacylglycerols                                                                                                                                                                                                                         |
|          |       | Neoacrimarine I                                       | [M+NH <sub>4</sub> ] <sup>+</sup> | 531.1529 | Acridones – Found in citrus                                                                                                                                                                                                              |
| 646.2575 | 18.76 | Acarbosa                                              | [M+H] <sup>+</sup>                | 645.2480 | Aminocyclitol glycosides                                                                                                                                                                                                                 |
|          |       | Alpha-Acarbose                                        | [M+H] <sup>+</sup>                | 645.2480 | Aminocyclitol glycosides                                                                                                                                                                                                                 |
|          |       | Acarbose                                              | [M+H] <sup>+</sup>                | 645.2480 | Aminocyclitol glycosides – Drug that inhibits alpha glucosidase that retards the digestion and absorption of carbohydrates in the small intestine, hence reducing the increase in blood-glucose concentration after a carbohydrate load. |
| 229.1433 | 5.30  | Butanedioic acid, octenyl-                            | [M+H] <sup>+</sup>                | 228.1362 | Fatty acid esters                                                                                                                                                                                                                        |
|          |       | 5-Heptyltetrahydro-2-oxo-3-furancarboxylic acid       | [M+H] <sup>+</sup>                | 228.1362 | Gamma butyrolactones                                                                                                                                                                                                                     |
|          |       | Traumatic acid                                        | [M+H] <sup>+</sup>                | 228.1362 | Monounsaturated dicarboxylic acid – Found in plants. Potent wound healing agent in plants                                                                                                                                                |
| 377.2659 | 13.29 | MG(18:2(9Z,12Z)/0:0/0:0)                              | [M+Na] <sup>+</sup>               | 354.2770 | Monoacylglycerol - formed biochemically via release of a fatty acid from diacylglycerol by diacylglycerol lipase or hormone sensitive lipase, also found in food so potential exposome                                                   |
|          |       | MG(0:0/18:2(9Z,12Z)/0:0)                              | [M+Na] <sup>+</sup>               | 354.2770 | Monoacylglycerol - formed biochemically via release of a fatty acid from diacylglycerol by                                                                                                                                               |

|          |       |                                                                                                                       |                                   |          |                                                                                                                                                                                                                           |
|----------|-------|-----------------------------------------------------------------------------------------------------------------------|-----------------------------------|----------|---------------------------------------------------------------------------------------------------------------------------------------------------------------------------------------------------------------------------|
|          |       |                                                                                                                       |                                   |          | diacylglycerol lipase or hormone sensitive lipase, also found in food so potential exposome                                                                                                                               |
|          |       | 4,7,13,16,21,24-Hexaoxa-1,10-diazabicyclo[8.8.8]hexacosane                                                            | [M+H] <sup>+</sup>                | 376.2573 | Trialkylamines                                                                                                                                                                                                            |
|          |       | 2-Linoleoyl Glycerol                                                                                                  | [M+Na] <sup>+</sup>               | 354.2770 | Lineolic acids and derivatives                                                                                                                                                                                            |
|          |       | Rioprostil                                                                                                            | [M+Na] <sup>+</sup>               | 354.2770 | Fatty alcohols                                                                                                                                                                                                            |
|          |       | Lavoltidine                                                                                                           | [M+NH <sub>4</sub> ] <sup>+</sup> | 359.2321 | N-benzylpiperidines                                                                                                                                                                                                       |
|          |       | Gepirone                                                                                                              | [M+NH <sub>4</sub> ] <sup>+</sup> | 359.2321 | N-arylpiperazines – Antidepressant and anxiolytic drug of azapirone group. gepirone metabolizes into 1-(2-pyrimidinyl)piperazine, which is known to act as a potent antagonist of the α <sub>2</sub> -adrenergic receptor |
| 343.2241 | 11.17 | (3R-(3α,4α(2R*,3R*),5β,6β))-5-Methoxy-4-(2-methyl-3-(3-methyl-2-butenyl)oxiranyl)-1-oxaspiro(2.5)octan-6-ol carbamate | [M+NH <sub>4</sub> ] <sup>+</sup> | 325.1889 | Carbamate esters                                                                                                                                                                                                          |
|          |       | 18-Hydroxyeicosatetraenoic acid                                                                                       | [M+Na] <sup>+</sup>               | 320.2351 | Hydroxyeicosatetraenoic acids                                                                                                                                                                                             |
|          |       | (5E,8E,11E,14E)-19-Hydroxyicosa-5,8,11,14-tetraenoic acid                                                             | [M+Na] <sup>+</sup>               | 320.2351 | Hydroxyeicosatetraenoic acids                                                                                                                                                                                             |
|          |       | (5Z,8Z,11Z,14Z)-3-hydroxyicosa-5,8,11,14-tetraenoic acid                                                              | [M+Na] <sup>+</sup>               | 320.2351 | Hydroxyeicosatetraenoic acids                                                                                                                                                                                             |
|          |       | 12,15-Epoxy-13,14-dimethyloctadeca-12,14,16-trienoic acid                                                             | [M+Na] <sup>+</sup>               | 320.2351 | Unsaturated furan fatty acids – Found in low concentration in food lipids. Found in fish. Excellent antioxidants and radical scavengers. Play an important role in preventing lipid peroxidation                          |

|  |  |                                                                           |                     |          |                                                                                                                                                                                                                                             |
|--|--|---------------------------------------------------------------------------|---------------------|----------|---------------------------------------------------------------------------------------------------------------------------------------------------------------------------------------------------------------------------------------------|
|  |  |                                                                           |                     |          | and protecting polyunsaturated fatty acids                                                                                                                                                                                                  |
|  |  | 12,15-Epoxy-13,14-dimethyloctadeca-10,12,14-trienoic acid                 | [M+Na] <sup>+</sup> | 320.2351 | Unsaturated furan fatty acids – Found in low concentration in food lipids. Found in fish. Excellent antioxidants and radical scavengers. Play an important role in preventing lipid peroxidation and protecting polyunsaturated fatty acids |
|  |  | 4-[3-(Tetradeca-2,5,8-trien-1-yl)oxiran-2-yl]butanoic acid                | [M+Na] <sup>+</sup> | 320.2351 | Epoxy fatty acids                                                                                                                                                                                                                           |
|  |  | (14R,15S)-14,15-Epoxy-5,8,11-icosatrienoic acid                           | [M+Na] <sup>+</sup> | 320.2351 | Long-chain fatty acids                                                                                                                                                                                                                      |
|  |  | (Z)-7-((2S,3R)-3-((2Z,5Z)-Undeca-2,5-dienyl)oxiran-2-yl)hept-5-enoic acid | [M+Na] <sup>+</sup> | 320.2351 | Long-chain fatty acids                                                                                                                                                                                                                      |
|  |  | Crispane                                                                  | [M+Na] <sup>+</sup> | 320.2351 | Found in herbs and spices                                                                                                                                                                                                                   |
|  |  | 12(S)-Hydroxy-5,8,10,14-eicosatetraenoic acid                             | [M+Na] <sup>+</sup> | 320.2351 | Hydroxyeicosatetraenoic acids                                                                                                                                                                                                               |
|  |  | 2-Hydroxy-6-tridecylbenzoic acid                                          | [M+Na] <sup>+</sup> | 320.2351 | Salicylic acids – Found in fats, oils, nuts                                                                                                                                                                                                 |
|  |  | (ent-2alpha,3beta,15beta)-16-Kaurene-2,3,15-triol                         | [M+Na] <sup>+</sup> | 320.2351 | Kaurane diterpenoids                                                                                                                                                                                                                        |
|  |  | (ent-2alpha,3beta,15beta,16beta)-15,16-Epoxy-2,3-kauranediol              | [M+Na] <sup>+</sup> | 320.2351 | Kaurane diterpenoids                                                                                                                                                                                                                        |
|  |  | Ucriol                                                                    | [M+Na] <sup>+</sup> | 320.2351 | Kaurane diterpenoids                                                                                                                                                                                                                        |
|  |  | 8alpha,13R-Epoxy-14-labden-19-oic acid                                    | [M+Na] <sup>+</sup> | 320.2351 | Triterpenoids                                                                                                                                                                                                                               |
|  |  | Annoglabasin E                                                            | [M+Na] <sup>+</sup> | 320.2351 | Kaurane diterpenoids                                                                                                                                                                                                                        |
|  |  | 15-Hydroxy-5,8,11,13-eicosatetraenoic acid                                | [M+Na] <sup>+</sup> | 320.2351 | Hydroxyeicosatetraenoic acids                                                                                                                                                                                                               |
|  |  | 11-Hydroxy-5Z,8Z,11E,14Z-eicosatetraenoic acid                            | [M+Na] <sup>+</sup> | 320.2351 | Hydroxyeicosatetraenoic acids                                                                                                                                                                                                               |
|  |  | Aloxistatin                                                               | [M+H] <sup>+</sup>  | 342.2155 | Leucine and derivatives                                                                                                                                                                                                                     |



|          |      |                                                                         |                                   |          |                                                                                                    |
|----------|------|-------------------------------------------------------------------------|-----------------------------------|----------|----------------------------------------------------------------------------------------------------|
|          |      | Isocupressic acid                                                       | [M+Na] <sup>+</sup>               | 320.2351 | Diterpenoids                                                                                       |
|          |      | Mutilin                                                                 | [M+Na] <sup>+</sup>               | 320.2351 | Mutilin derivatives                                                                                |
|          |      | 1-Hydroxy-2,2,5,5-tetramethylpyrrolidine-3-carboxylic acid methyl ester | [M+H] <sup>+</sup>                | 201.1365 | Pyrrolidine carboxylic acids                                                                       |
|          |      | 1-Acetylcyclohexyl acetate                                              | [M+NH <sub>4</sub> ] <sup>+</sup> | 184.1099 | Alpha-acyloxy ketones                                                                              |
|          |      | (S)-Oleuropeic acid                                                     | [M+NH <sub>4</sub> ] <sup>+</sup> | 184.1099 | Menthane monoterpenoids                                                                            |
|          |      | alpha-Campholonic acid                                                  | [M+NH <sub>4</sub> ] <sup>+</sup> | 184.1099 | Iridoids and derivatives – Found in sage                                                           |
|          |      | (4S,8R)-8,9-Dihydroxy-p-menth-1(6)-en-2-one                             | [M+NH <sub>4</sub> ] <sup>+</sup> | 184.1099 | Menthane monoterpenoids                                                                            |
|          |      | 1,3-Bis(hydroxymethyl)-3-methylbicyclo[2.2.1]heptan-2-one               | [M+NH <sub>4</sub> ] <sup>+</sup> | 184.1099 | Bicyclic monoterpenoids                                                                            |
|          |      | (1'R)-Nepetalic acid                                                    | [M+NH <sub>4</sub> ] <sup>+</sup> | 184.1099 | Monocyclic monoterpenoids                                                                          |
| 202.1437 | 3.85 | N-(5-Methyl-3-oxohexyl)alanine                                          | [M+H] <sup>+</sup>                | 201.1365 | Alanine and derivatives                                                                            |
|          |      | Valproylglycine                                                         | [M+H] <sup>+</sup>                | 201.1365 | N-acyl-alpha amino acids                                                                           |
|          |      | 3,5-Diisopropylsalicylic acid                                           | [M+NH <sub>4</sub> ] <sup>+</sup> | 222.1256 | Salicylic acids                                                                                    |
|          |      | 3-Hexylsalicylic acid                                                   | [M+NH <sub>4</sub> ] <sup>+</sup> | 222.1256 | Salicylic acids                                                                                    |
|          |      | (+)-Dehydrovomifoliol                                                   | [M+NH <sub>4</sub> ] <sup>+</sup> | 222.1256 | Sesquiterpenoids – Found in rice                                                                   |
|          |      | Hexyl salicylic acid                                                    | [M+NH <sub>4</sub> ] <sup>+</sup> | 222.1256 | O-hydroxybenzoic acid esters                                                                       |
| 240.1592 | 5.52 | 3-Hydroxyibuprofen                                                      | [M+NH <sub>4</sub> ] <sup>+</sup> | 222.1256 | Phenylpropanoic acids – Metabolite of ibuprofen. 3-hydroxyibuprofen can be converted into carboxy- |

|  |  |                                     |              |          |                                                                                                                                                                                                                                                                                               |
|--|--|-------------------------------------|--------------|----------|-----------------------------------------------------------------------------------------------------------------------------------------------------------------------------------------------------------------------------------------------------------------------------------------------|
|  |  |                                     |              |          | ibuprofen; which is mediated by the enzyme cytochrome P450 2C9                                                                                                                                                                                                                                |
|  |  | 2-Hydroxyibuprofen                  | $[M+NH_4]^+$ | 222.1256 | Phenylpropanoic acids – Metabolite of ibuprofen                                                                                                                                                                                                                                               |
|  |  | 1-Hydroxyibuprofen                  | $[M+NH_4]^+$ | 222.1256 | Metabolite of ibuprofen                                                                                                                                                                                                                                                                       |
|  |  | Moprolol                            | $[M+H]^+$    | 239.1521 | Beta-adrenergic antagonist or beta blocker – Treats hypertension, high blood pressure, angina pectoris, arrhythmias, anxiety, glaucoma                                                                                                                                                        |
|  |  | Methyl 3-epi-4,5-didehydrojasmonate | $[M+NH_4]^+$ | 222.1256 | Methyl esters                                                                                                                                                                                                                                                                                 |
|  |  | Annuionone B                        | $[M+NH_4]^+$ | 222.1256 | Oxepanes – found in fats, oils, sunflower                                                                                                                                                                                                                                                     |
|  |  | Isoamyl p-anisate                   | $[M+NH_4]^+$ | 222.1256 | P-methoxybenzoic acids and derivatives                                                                                                                                                                                                                                                        |
|  |  | Dehydrovomifoliol                   | $[M+NH_4]^+$ | 222.1256 | Sesquiterpenoids                                                                                                                                                                                                                                                                              |
|  |  | Petasinine                          | $[M+H]^+$    | 239.1521 | Pyrrolizidines                                                                                                                                                                                                                                                                                |
|  |  | 3alpha-Tigloyloxytropene N-oxide    | $[M+H]^+$    | 239.1521 | Tropane alkaloids – Found in fruits                                                                                                                                                                                                                                                           |
|  |  | Salbutamol                          | $[M+H]^+$    | 239.1521 | Short-acting, selective beta2-adrenergic receptor agonist. Salbutamol is generally used for acute episodes of bronchospasm caused by bronchial asthma, chronic bronchitis and other chronic bronchopulmonary disorders such as chronic obstructive pulmonary disorder (COPD). It is also used |

|          |       |                                                                                                                                                       |                                   |          |                                                                                                        |
|----------|-------|-------------------------------------------------------------------------------------------------------------------------------------------------------|-----------------------------------|----------|--------------------------------------------------------------------------------------------------------|
|          |       |                                                                                                                                                       |                                   |          | prophylactically for exercise-induced asthma                                                           |
|          |       | Isoetharine                                                                                                                                           | [M+H] <sup>+</sup>                | 239.1521 | Catechols - drug which is used for the treatment of asthma, wheezing, and chronic asthmatic bronchitis |
| 313.1619 | 4.90  | N2-Ethyl-2'-deoxyguanosine                                                                                                                            | [M+NH <sub>4</sub> ] <sup>+</sup> | 295.1281 | Purine 2'-deoxyribonucleosides                                                                         |
|          |       | N(6),O(2)-Dimethyladenosine                                                                                                                           | [M+NH <sub>4</sub> ] <sup>+</sup> | 295.1281 | Purine nucleosides                                                                                     |
| 185.0961 | 6.78  | Benzyl phenyl ether                                                                                                                                   | [M+H] <sup>+</sup>                | 184.0888 | Phenol ethers                                                                                          |
|          |       | Methyl-[12]-gingerol                                                                                                                                  | [M+Na] <sup>+</sup>               | 392.2927 | Dimethoxybenzenes – Found in ginger                                                                    |
|          |       | 4-[(5R,8S,10R,13R,17R)-3,6-Dihydroxy-10,13-dimethyl-2,3,4,5,6,7,8,9,11,12,14,15,16,17-tetradecahydro-1H-cyclopenta[a]phenanthren-17-yl]pentanoic acid | [M+Na] <sup>+</sup>               | 392.2927 | Dihydroxy bile acids, alcohols and derivatives                                                         |
|          |       | 3,7-Dihydroxycholan-24-oic acid                                                                                                                       | [M+Na] <sup>+</sup>               | 392.2927 | Dihydroxy bile acids, alcohols and derivatives                                                         |
| 415.2818 | 11.04 | 3alpha,12beta-Dihydroxy-5alpha-cholan-24-oic Acid                                                                                                     | [M+Na] <sup>+</sup>               | 392.2927 | Dihydroxy bile acids, alcohols and derivatives                                                         |
| 424.3419 | 9.86  | [14]-Gingerol                                                                                                                                         | [M+NH <sub>4</sub> ] <sup>+</sup> | 406.3083 | Gingerols – Found in ginger                                                                            |
|          |       | 9H-Purine-9-butanoic acid, 6-amino-alpha-hydroxy-, methyl ester                                                                                       | [M+NH <sub>4</sub> ] <sup>+</sup> | 251.1018 | 6-aminopurines                                                                                         |
|          |       | 2',3'-Dideoxyguanosine                                                                                                                                | [M+NH <sub>4</sub> ] <sup>+</sup> | 251.1018 | Purine 2',3'-dideoxyribonucleosides                                                                    |
|          |       | Cordycepin                                                                                                                                            | [M+NH <sub>4</sub> ] <sup>+</sup> | 251.1018 | Purine 3'-deoxyribonucleosides                                                                         |
| 269.1357 | 5.45  | Dibutyl malate                                                                                                                                        | [M+Na] <sup>+</sup>               | 246.1467 | Beta hydroxy acids and derivatives                                                                     |

|          |      |                      |              |          |                                                                                                                                                                                                                                                                                               |
|----------|------|----------------------|--------------|----------|-----------------------------------------------------------------------------------------------------------------------------------------------------------------------------------------------------------------------------------------------------------------------------------------------|
| 320.2429 | 6.63 | Gemcabene            | $[M+NH_4]^+$ | 302.2093 | Medium-chain fatty acids                                                                                                                                                                                                                                                                      |
| 263.0814 | 7.48 | Aminonitropyrene     | $[M+H]^+$    | 262.0742 | Pyrenes                                                                                                                                                                                                                                                                                       |
|          |      | Indigo               | $[M+H]^+$    | 262.0742 | Oxindole dimer – Detected in human urine and tissue. Mammals produce minute amount but are mostly synthetic. Dye                                                                                                                                                                              |
|          |      | Indirubin            | $[M+H]^+$    | 262.0742 | Oxindole dimer - – Detected in human urine and tissue. Mammals produce minute amount but are mostly extracted from plants. Indirubin has shown anti-inflammatory and anti-angiogenesis properties in vitro. It has also been studied for potential use in the treatment of ulcerative colitis |
|          |      | Lamivudine sulfoxide | $[M+NH_4]^+$ | 245.0470 | Nucleoside and nucleotide analogues. In humans, lamivudine sulfoxide is involved in lamivudine metabolism pathway. Can be biosynthesized, but also a synthetic antiprotozoal agent                                                                                                            |

Table S9: Tentatively Identified Endogenous Metabolites for Low vs. Moderate Disease Activity in Negative Mode

| m/z      | RT    | Tentative ID               | Adduct                | Monoisotopic Mass | Biological Significance                                                                                                                                                                                                                                                                                                                                                                                                          |
|----------|-------|----------------------------|-----------------------|-------------------|----------------------------------------------------------------------------------------------------------------------------------------------------------------------------------------------------------------------------------------------------------------------------------------------------------------------------------------------------------------------------------------------------------------------------------|
| 212.0026 | 3.97  | 7-Hydroxyindole sulfate    | [M-H] <sup>-</sup>    | 213.0096          | arylsulfates                                                                                                                                                                                                                                                                                                                                                                                                                     |
|          |       | 6-Hydroxyindole sulfate    | [M-H] <sup>-</sup>    | 213.0096          | arylsulfates                                                                                                                                                                                                                                                                                                                                                                                                                     |
|          |       |                            |                       |                   | arylsulfates. Metabolite of tryptophan. Derived through consumption, digestion, microbial processing of protein rich foods (Derived from host and bacteria). Can bind serum albumin. Agonist for arylhydrocarbon receptor. High concentrations in blood associated with chronic kidney disease, and cardiovascular disease. Involved with oxidative stress, impair osteoblast and bone turnover. Is a myotoxin, neurotoxin, etc. |
| 729.1788 | 11.02 | Neocuscutoside C           | [M+Cl] <sup>-</sup>   | 694.2109          | lignan glycosides                                                                                                                                                                                                                                                                                                                                                                                                                |
| 464.3020 | 7.39  | glyco-beta-muricholic acid | [M-H] <sup>-</sup>    | 465.3090          | extremely weak basic                                                                                                                                                                                                                                                                                                                                                                                                             |
|          |       | N-Palmitoyl tyrosine       | [M+FA-H] <sup>-</sup> | 419.3036          | N-acylamides. Is an amino acid conjugate classified as long chain N-acylamide. Could be associated with signaling, cell migration, inflammation, etc.                                                                                                                                                                                                                                                                            |
|          |       | Glycohyocholic acid        | [M-H] <sup>-</sup>    | 465.3090          | Bile acid. Involved in excretion, absorption, transport of fats and sterols. But could also disrupt membranes. Plethora of mechanisms to limit accumulation in blood and tissues                                                                                                                                                                                                                                                 |
|          |       |                            |                       |                   | acyl glycine and bile acid-glycine conjugate. Secondary bile acid produced by microbiome. Involved in fat/lipid absorption, transport, excretion. Could be associated with in-born                                                                                                                                                                                                                                               |
|          |       | Glycocholic acid           | [M-H] <sup>-</sup>    | 465.3090          |                                                                                                                                                                                                                                                                                                                                                                                                                                  |

|          |       |                                         |                       |          |                                                                                                                                                                                                                   |
|----------|-------|-----------------------------------------|-----------------------|----------|-------------------------------------------------------------------------------------------------------------------------------------------------------------------------------------------------------------------|
|          |       |                                         |                       |          | error of metabolism - alpha-1-antitrypsin deficiency                                                                                                                                                              |
|          |       | Stearidonyl carnitine                   | [M+FA-H] <sup>-</sup> | 419.3036 | acylcarnitine. Associated with energy production and intermediary metabolism.                                                                                                                                     |
|          |       | 3a,7b,12a-Trihydroxyoxocholanyl-Glycine | [M-H] <sup>-</sup>    | 465.3090 | Acyl glycine and bile acid-glycine conjugate. Secondary bile acid produced by microbiome. Specific ketone bile acid found in urine of infants during neonatal period                                              |
| 802.5614 | 13.14 | PC(18:1(9Z)-O(12,13)/P-16:0)            | [M+FA-H] <sup>-</sup> | 757.5622 | Oxidized phosphatidylcholine. Role as signaling molecules. Biosynthesis by COX, LOX, CYP, or through uncontrolled oxidation via free radicals. Key components of lipid bilayer, involved in metabolism, signaling |
|          |       | PC(P-16:0/18:1(9Z)-O(12,13))            | [M+FA-H] <sup>-</sup> | 757.5622 | Oxidized phosphatidylcholine. Role as signaling molecules. Biosynthesis by COX, LOX, CYP, or through uncontrolled oxidation via free radicals. Key components of lipid bilayer, involved in metabolism, signaling |
|          |       | PC(18:1(12Z)-O(9S,10R)/P-16:0)          | [M+FA-H] <sup>-</sup> | 757.5622 | Oxidized phosphatidylcholine. Role as signaling molecules. Biosynthesis by COX, LOX, CYP, or through uncontrolled oxidation via free radicals. Key components of lipid bilayer, involved in metabolism, signaling |
|          |       | PC(P-16:0/18:1(12Z)-O(9S,10R))          | [M+FA-H] <sup>-</sup> | 757.5622 | Oxidized phosphatidylcholine. Role as signaling molecules. Biosynthesis by COX, LOX, CYP, or through uncontrolled oxidation via free radicals. Key components of lipid bilayer, involved in metabolism, signaling |
|          |       | PC(20:2(11Z,14Z)/14:0)                  | [M+FA-H] <sup>-</sup> | 757.5622 | Glycerophospholipid. Derived from oils and liver. Key components of lipid bilayer, metabolism, signaling                                                                                                          |

|  |  |                        |                       |          |                                                                                                                                 |
|--|--|------------------------|-----------------------|----------|---------------------------------------------------------------------------------------------------------------------------------|
|  |  | PC(20:1(11Z)/14:1(9Z)) | [M+FA-H] <sup>-</sup> | 757.5622 | Glycerophospholipid. Derived from oils and liver. Key components of lipid bilayer, metabolism, signaling                        |
|  |  | PC(18:2(9Z,12Z)/16:0)  | [M+FA-H] <sup>-</sup> | 757.5622 | Glycerophospholipid. Derived from oils and liver. Key components of lipid bilayer, metabolism, signaling                        |
|  |  | PC(18:1(9Z)/16:1(9Z))  | [M+FA-H] <sup>-</sup> | 757.5622 | Glycerophospholipid. Derived from oils and liver. Key components of lipid bilayer, metabolism, signaling                        |
|  |  | PC(18:1(11Z)/16:1(9Z)) | [M+FA-H] <sup>-</sup> | 757.5622 | Glycerophospholipid. Derived from oils and liver. Key components of lipid bilayer, metabolism, signaling                        |
|  |  | PC(16:1(9Z)/18:1(11Z)) | [M+FA-H] <sup>-</sup> | 757.5622 | Glycerophospholipid. Derived from oils and liver. Key components of lipid bilayer, metabolism, signaling                        |
|  |  | PC(16:1(9Z)/18:1(9Z))  | [M+FA-H] <sup>-</sup> | 757.5622 | Glycerophospholipid. Derived from oils and liver. Key components of lipid bilayer, metabolism, signaling                        |
|  |  | PC(16:0/18:2(9Z,12Z))  | [M+FA-H] <sup>-</sup> | 757.5622 | Glycerophospholipid. Derived from oils and liver. Key components of lipid bilayer, metabolism, signaling                        |
|  |  | PC(14:1(9Z)/20:1(11Z)) | [M+FA-H] <sup>-</sup> | 757.5622 | Glycerophospholipid. Derived from oils and liver. Key components of lipid bilayer, metabolism, signaling                        |
|  |  | PC(14:0/20:2(11Z,14Z)) | [M+FA-H] <sup>-</sup> | 757.5622 | Glycerophospholipid. Derived from oils and liver. Key components of lipid bilayer, metabolism, signaling                        |
|  |  | PE(PGF1alpha/P-18:0)   | [M-H] <sup>-</sup>    | 803.5676 | Oxidized phosphatidylethanolamine. Role as signalling molecules. Biosynthesis by LOX, COX, CYP or by uncontrolled oxidation via |

|  |  |                                   |                       |          |                                                                                                                                                                                                                      |
|--|--|-----------------------------------|-----------------------|----------|----------------------------------------------------------------------------------------------------------------------------------------------------------------------------------------------------------------------|
|  |  |                                   |                       |          | free radicals. Key components of lipid bilayer, involved in metabolism and signaling                                                                                                                                 |
|  |  | PE(P-18:0/PGF1alpha)              | [M-H] <sup>-</sup>    | 803.5676 | Oxidized phosphatidylethanolamine. Role as signalling molecules. Biosynthesis by LOX, COX, CYP or by uncontrolled oxidation via free radicals. Key components of lipid bilayer, involved in metabolism and signaling |
|  |  | PE(18:1(12Z)-2OH(9,10)/20:1(11Z)) | [M-H] <sup>-</sup>    | 803.5676 | Oxidized phosphatidylethanolamine. Role as signalling molecules. Biosynthesis by LOX, COX, CYP or by uncontrolled oxidation via free radicals. Key components of lipid bilayer, involved in metabolism and signaling |
|  |  | PE(20:1(11Z)/18:1(12Z)-2OH(9,10)) | [M-H] <sup>-</sup>    | 803.5676 | Oxidized phosphatidylethanolamine. Role as signalling molecules. Biosynthesis by LOX, COX, CYP or by uncontrolled oxidation via free radicals. Key components of lipid bilayer, involved in metabolism and signaling |
|  |  | PE(22:2(13Z,16Z)/15:0)            | [M+FA-H] <sup>-</sup> | 757.5622 | Phosphatidylethanolamine. Derived from animal fats, dairy. Key component of lipid bilayer, metabolism, signaling                                                                                                     |
|  |  | PE(15:0/22:2(13Z,16Z))            | [M+FA-H] <sup>-</sup> | 757.5622 | Phosphatidylethanolamine. Derived from animal fats, dairy. Key component of lipid bilayer, metabolism, signaling                                                                                                     |
|  |  | PE-NMe2(20:2(11Z,14Z)/15:0)       | [M+FA-H] <sup>-</sup> | 757.5622 | Methylphosphatidylethanolamine. Formed by sequential methylation for biosynthesis of phosphatidylcholine.                                                                                                            |
|  |  | PE-NMe2(15:0/20:2(11Z,14Z))       | [M+FA-H] <sup>-</sup> | 757.5622 | Methylphosphatidylethanolamine. Formed by sequential methylation for biosynthesis of phosphatidylcholine.                                                                                                            |



|  |  |                            |                       |          |                                                                                                           |
|--|--|----------------------------|-----------------------|----------|-----------------------------------------------------------------------------------------------------------|
|  |  | PE-NMe(20:2(11Z,14Z)/16:0) | [M+FA-H] <sup>-</sup> | 757.5622 | Methylphosphatidylethanolamine. Formed by sequential methylation for biosynthesis of phosphatidylcholine. |
|  |  | PE-NMe(16:0/20:2(11Z,14Z)) | [M+FA-H] <sup>-</sup> | 757.5622 | Methylphosphatidylethanolamine. Formed by sequential methylation for biosynthesis of phosphatidylcholine. |
|  |  | PE-NMe(22:2(13Z,16Z)/14:0) | [M+FA-H] <sup>-</sup> | 757.5622 | Methylphosphatidylethanolamine. Formed by sequential methylation for biosynthesis of phosphatidylcholine. |
|  |  | PE-NMe(22:1(13Z)/14:1(9Z)) | [M+FA-H] <sup>-</sup> | 757.5622 | Methylphosphatidylethanolamine. Formed by sequential methylation for biosynthesis of phosphatidylcholine. |
|  |  | PE-NMe(20:1(11Z)/16:1(9Z)) | [M+FA-H] <sup>-</sup> | 757.5622 | Methylphosphatidylethanolamine. Formed by sequential methylation for biosynthesis of phosphatidylcholine. |
|  |  | PE-NMe(18:2(9Z,12Z)/18:0)  | [M+FA-H] <sup>-</sup> | 757.5622 | Methylphosphatidylethanolamine. Formed by sequential methylation for biosynthesis of phosphatidylcholine. |
|  |  | PE-NMe(18:0/18:2(9Z,12Z))  | [M+FA-H] <sup>-</sup> | 757.5622 | Methylphosphatidylethanolamine. Formed by sequential methylation for biosynthesis of phosphatidylcholine. |
|  |  | PE-NMe(14:1(9Z)/22:1(13Z)) | [M+FA-H] <sup>-</sup> | 757.5622 | Methylphosphatidylethanolamine. Formed by sequential methylation for biosynthesis of phosphatidylcholine. |
|  |  | PE-NMe(14:0/22:2(13Z,16Z)) | [M+FA-H] <sup>-</sup> | 757.5622 | Methylphosphatidylethanolamine. Formed by sequential methylation for biosynthesis of phosphatidylcholine. |
|  |  | PE-NMe(18:1(9Z)/18:1(11Z)) | [M+FA-H] <sup>-</sup> | 757.5622 | Methylphosphatidylethanolamine. Formed by sequential methylation for biosynthesis of phosphatidylcholine. |

|          |      |                             |                       |          |                                                                                                                                                                                     |
|----------|------|-----------------------------|-----------------------|----------|-------------------------------------------------------------------------------------------------------------------------------------------------------------------------------------|
|          |      | PE-NMe(18:1(11Z)/18:1(9Z))  | [M+FA-H] <sup>-</sup> | 757.5622 | Methylphosphatidylethanolamine. Formed by sequential methylation for biosynthesis of phosphatidylcholine.                                                                           |
|          |      | PE-NMe(18:1(11Z)/18:1(11Z)) | [M+FA-H] <sup>-</sup> | 757.5622 | Methylphosphatidylethanolamine. Formed by sequential methylation for biosynthesis of phosphatidylcholine.                                                                           |
|          |      | PE-NMe(16:1(9Z)/20:1(11Z))  | [M+FA-H] <sup>-</sup> | 757.5622 | Methylphosphatidylethanolamine. Formed by sequential methylation for biosynthesis of phosphatidylcholine.                                                                           |
|          |      | PE-NMe(18:1(9Z)/18:1(9Z))   | [M+FA-H] <sup>-</sup> | 757.5622 | Methylphosphatidylethanolamine. Formed by sequential methylation for biosynthesis of phosphatidylcholine.                                                                           |
|          |      | PS(22:1(13Z)/15:0)          | [M-H] <sup>-</sup>    | 803.5676 | Phosphatidylserine. Can act as calcium chelator. anionic.                                                                                                                           |
|          |      | PS(15:0/22:1(13Z))          | [M-H] <sup>-</sup>    | 803.5676 | Phosphatidylserine. Can act as calcium chelator. anionic.                                                                                                                           |
| 448.3073 | 8.18 | N-Palmitoyl phenylalanine   | [M+FA-H] <sup>-</sup> | 403.3086 | N-acylamides. Amino acid conjugate, long chain N-acylamide. Could be associated with signaling, cell migration, inflammation, etc.                                                  |
|          |      | Chenodeoxycholyglycine      | [M-H] <sup>-</sup>    | 449.3141 | Glycinated bile acids and derivatives.                                                                                                                                              |
|          |      | Glycohyodeoxycholic acid    | [M-H] <sup>-</sup>    | 449.3141 | Glycinated bile acids and derivatives.                                                                                                                                              |
|          |      | Deoxycholyglycine           | [M-H] <sup>-</sup>    | 449.3141 | Glycinated bile acids and derivatives.                                                                                                                                              |
|          |      | Chenodeoxyglycocholic acid  | [M-H] <sup>-</sup>    | 449.3141 | Glycine conjugated bile acids. Modulate bile flow and lipid secretion (Important for absorption of fats and vitamins. Facilitate excretion, absorption, transport of fats/steroids. |
|          |      | Glycoursodeoxycholic acid   | [M-H] <sup>-</sup>    | 449.3141 | Acyl glycine and bile acid-glycine conjugate. Secondary bile acid produced by microbiome.                                                                                           |

|          |      |                                         |                    |          |                                                                                                                                                                       |
|----------|------|-----------------------------------------|--------------------|----------|-----------------------------------------------------------------------------------------------------------------------------------------------------------------------|
| 203.0830 |      |                                         |                    |          | Facilitates transport/absorption/excretion of fats/sterols.                                                                                                           |
|          |      | Deoxycholic acid glycine conjugate      | [M-H] <sup>-</sup> | 449.3141 | Bile salt formed in liver. Secondary bile acid produced by microbiome. Facilitates transport/excretion/absorption of fats/sterols                                     |
|          |      | Chenodeoxycholic acid glycine conjugate | [M-H] <sup>-</sup> | 449.3141 | Acyl glycine and bile acid-glycine conjugate. Secondary bile acid produced by microbiome. Facilitates absorption of fats and is itself absorbed                       |
|          | 3.58 | Nirvanol                                | [M-H] <sup>-</sup> | 204.0899 | Phenylhydantoins. Primary metabolite involved in growth, development, reproduction                                                                                    |
|          |      | 3-Hydroxymethylantipyrine               | [M-H] <sup>-</sup> | 204.0899 | Phenylpyrazoles.                                                                                                                                                      |
|          |      | D-Tryptophan                            | [M-H] <sup>-</sup> | 204.0899 | Indolyl carboxylic acids and derivatives. Found in all living organisms. Secondary metabolite (Signaling/defense/incomplete metabolism of other secondary metabolites |
|          |      | L-Tryptophan                            | [M-H] <sup>-</sup> | 204.0899 | Alpha amino acid. Proteinogenic, found in all living organisms. Essential organisms.                                                                                  |

Table S10: Tentatively Identified Exogenous Metabolites for Low vs. Moderate Disease Activity in Negative Mode

| m/z       | RT    | Tentative ID                                              | Adduct                | Monoisotopic Mass | Biological Significance                                                             |
|-----------|-------|-----------------------------------------------------------|-----------------------|-------------------|-------------------------------------------------------------------------------------|
| 212.00258 | 3.97  | 4H-Thieno[3,2-b]pyrrole-5-carboxylic acid                 | [M+FA-H] <sup>-</sup> | 167.0041          | Thienopyrroles                                                                      |
| 729.17876 | 11.02 | Sucrose 1',4'-(4,4'-dihydroxy-3,3'-dimethoxy-b-truxinate) | [M+Cl] <sup>-</sup>   | 694.2109          | Stilbene - Found in cereals, oats                                                   |
|           |       | 1,2-Diferuloylgentiobiose                                 | [M+Cl] <sup>-</sup>   | 694.2109          | Hydroxycinnamic acid glycosides – Found in broccoli                                 |
|           |       | Neocuscutoside C                                          | [M+Cl] <sup>-</sup>   | 694.2109          | Lignan glycosides                                                                   |
|           |       | Sesaminol glucosyl-(1->2)-glucoside                       | [M+Cl] <sup>-</sup>   | 694.2109          | Lignan glycosides – Found in cereal                                                 |
| 343.1707  | 8.15  | Tamoxifen-ol                                              | [M-H] <sup>-</sup>    | 344.1776          | Stilbene                                                                            |
| 667.14192 | 11.98 | Etoposide phosphate                                       | [M-H] <sup>-</sup>    | 668.1506          | Xanthines                                                                           |
|           |       | Calcein                                                   | [M+FA-H] <sup>-</sup> | 622.1435          | Pentacarboxylic acids – Fluorescent dye                                             |
| 388.15593 | 8.00  | Epiroprim                                                 | [M+Cl] <sup>-</sup>   | 353.1852          | Phenylpyrroles                                                                      |
| 203.08299 | 3.58  | 2,3-Diaminonaphthalene                                    | [M+FA-H] <sup>-</sup> | 158.0844          | Naphthalene                                                                         |
|           |       | 1,2-Diaminonaphthalene                                    | [M+FA-H] <sup>-</sup> | 158.0844          | Naphthalene                                                                         |
|           |       | 1,5-Naphthalenediamine                                    | [M+FA-H] <sup>-</sup> | 158.0844          | Naphthalene                                                                         |
|           |       | Idazoxan                                                  | [M-H] <sup>-</sup>    | 204.0899          | Benzo-1,4-dioxanes                                                                  |
|           |       | Nicotyrine                                                | [M+FA-H] <sup>-</sup> | 158.0844          | Pyridines                                                                           |
|           |       | S-nirvanol                                                | [M-H] <sup>-</sup>    | 204.0899          | Metabolite of mephentytoin, an anticonvulsant                                       |
|           |       | 4-Hydroxyantipyrine                                       | [M-H] <sup>-</sup>    | 204.0899          | Metabolite of antipyrine, an analgesic and antipyretic given via mouth or ear drops |

|  |  |                   |                       |          |                                         |
|--|--|-------------------|-----------------------|----------|-----------------------------------------|
|  |  | Ethotoin          | [M-H] <sup>-</sup>    | 204.0899 | Hydantoin derivative and anticonvulsant |
|  |  | 1-Benzylimidazole | [M+FA-H] <sup>-</sup> | 158.0844 | n-substituted imidazoles                |

Table S11: Peaks of overlapping features across models

| Feature Peak | m/z      |
|--------------|----------|
|              | 116.0708 |
|              | 159.1168 |
|              | 215.1279 |

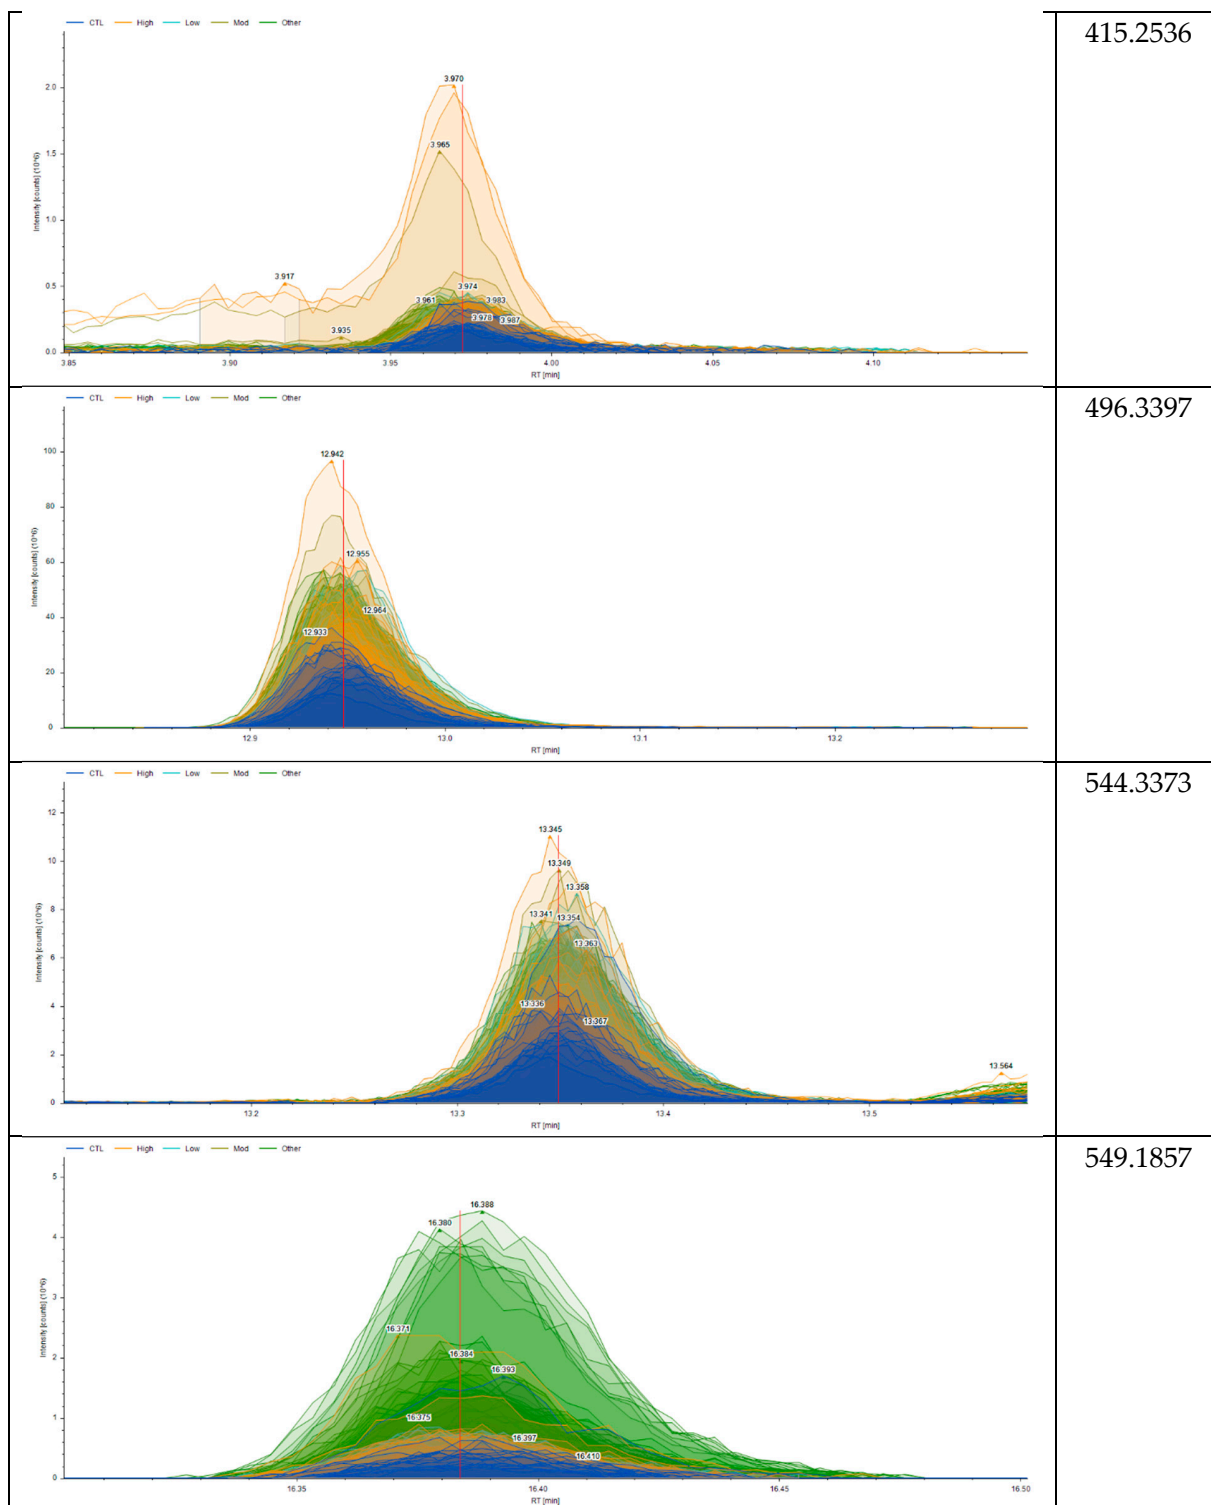





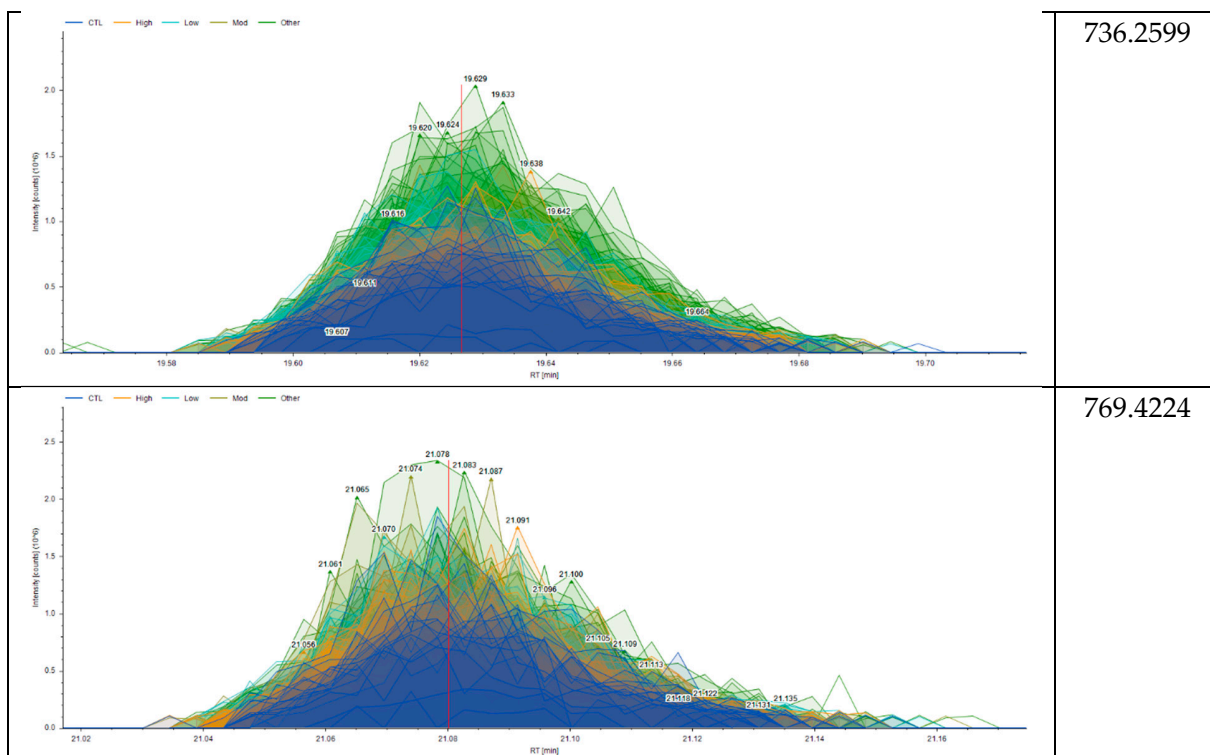

Table S12: Demographics information for low PASI classified patients

| ID   | PASI | Sex    | Age<br>(years) | Treatment History | BMI  | Psoriasis<br>duration<br>(years) | PsA<br>duration<br>(years) | Comorbidities                 |
|------|------|--------|----------------|-------------------|------|----------------------------------|----------------------------|-------------------------------|
| 797  | 0.1  | FEMALE | 60             | NSAIDs            |      | 27.0                             | 19.0                       | Hyperlipidemia                |
| 3168 | 0.3  | MALE   | 49             | DMARDs            | 40.9 | 27.3                             | 14.3                       | none                          |
| 3621 | 0.3  | FEMALE | 43             | NSAIDs            | 22.0 | 3.2                              | 3.2                        | none                          |
| 3591 | 0.3  | FEMALE | 53             | NSAIDs            |      | 44.3                             | 21.3                       | Depression + Hyperlipidemia   |
| 3475 | 0.4  | MALE   | 28             | DMARDs            | 26.0 | 2.0                              | 2.0                        | Hyperlipidemia                |
| 3642 | 0.4  | FEMALE | 34             | NSAIDs            | 19.8 | 16.5                             | 6.5                        | none                          |
| 3733 | 0.5  | FEMALE | 44             | NSAIDs + DMARDs   | 34.8 | 13.7                             | 3.7                        | none                          |
| 385  | 0.6  | MALE   | 50             | NSAIDs            | 29.7 | 30.2                             | 21.2                       | Hyperlipidemia                |
| 3491 | 0.6  | FEMALE | 45             | NSAIDs            | 41.0 | 36.5                             | 2.5                        | none                          |
| 3620 | 0.6  | FEMALE | 34             | NSAIDs + DMARDs   | 30.1 | 6.4                              | 1.4                        | none                          |
| 268  | 0.7  | FEMALE | 62             | NSAIDs + DMARDs   | 27.6 | 46.8                             | 28.8                       | Hyperlipidemia                |
| 3157 | 0.8  | MALE   | 46             | NSAIDs + DMARDs   | 28.1 | 19.9                             | 4.9                        | none                          |
| 3064 | 0.8  | FEMALE | 58             | none              | 20.6 | 35.5                             | 9.5                        | Depression                    |
| 3273 | 0.9  | MALE   | 50             | NSAIDs            | 27.1 | 2.8                              | 2.8                        | none                          |
| 3573 | 0.9  | FEMALE | 59             | none              |      | 12.1                             | 4.1                        | none                          |
| 3670 | 0.9  | MALE   | 28             | NSAIDs            | 23.5 | 15.9                             | 1.9                        | none                          |
| 3471 | 0.9  | FEMALE | 57             | none              | 26.9 | 10.5                             | 7.5                        | none                          |
| 3079 | 1    | FEMALE | 42             | none              | 21.2 | 34.1                             | 1.1                        | none                          |
| 3302 | 1    | MALE   | 22             | DMARDs            | 31.1 | 4.0                              | 3.0                        | none                          |
| 776  | 1.2  | MALE   | 41             | none              | 23.5 | 9.3                              | 4.3                        | none                          |
| 3205 | 1.2  | FEMALE | 45             | NSAIDs            |      | 1.4                              | 1.4                        | Hyperlipidemia                |
| 3174 | 1.2  | MALE   | 18             | NSAIDs            | 16.2 | 11.1                             | 1.1                        | none                          |
| 345  | 1.2  | MALE   | 47             | NSAIDs            | 24.7 | 27.2                             | 24.2                       | none                          |
| 3169 | 1.2  | FEMALE | 49             | NSAIDs            | 25.2 | 41.7                             | 6.7                        | none                          |
| 367  | 1.2  | FEMALE | 65             | NSAIDs + DMARDs   | 36.6 | 27.6                             | 27.6                       | Hypertension + Hyperlipidemia |

|      |     |        |    |                   |      |      |      |                                             |
|------|-----|--------|----|-------------------|------|------|------|---------------------------------------------|
| 693  | 1.3 | FEMALE | 42 | DMARDs            | 21.6 | 21.8 | 9.8  | none                                        |
| 3632 | 1.3 | FEMALE | 31 | NSAIDs            | 24.8 | 6.6  | 0.6  | none                                        |
| 3577 | 1.5 | MALE   | 60 | NSAIDs            | 23.2 | 14.5 | 13.5 | none                                        |
| 593  | 1.5 | MALE   | 75 | none              | 29.7 | 53.6 | 18.6 | Hypertension + Diabetes +<br>Hyperlipidemia |
| 3438 | 1.7 | MALE   | 22 | none              | 23.3 | 0.5  | 0.5  | none                                        |
| 382  | 1.8 | MALE   | 49 | none              |      | 23.4 | 23.4 | Hypertension + Diabetes +<br>Hyperlipidemia |
| 417  | 1.8 | MALE   | 46 | NSAIDs            | 27.9 | 23.5 | 23.5 | none                                        |
| 3417 | 1.8 | MALE   | 34 | NSAIDs + DMARDs   | 26.1 | 2.0  | 1.0  | none                                        |
| 3265 | 1.8 | FEMALE | 53 | DMARDs + Steroids | 49.3 | 22.9 | 8.9  | Hypertension + Hyperlipidemia               |
| 746  | 1.8 | MALE   | 72 | none              | 30.3 | 14.9 | 14.9 | none                                        |
| 3649 | 1.8 | MALE   | 41 | NSAIDs            | 25.6 | 21.3 | 1.3  | Depression                                  |
| 3613 | 1.8 | MALE   | 40 | DMARDs + Steroids | 25.0 | 20.0 | 0.0  | none                                        |
| 3518 | 2.1 | MALE   | 49 | NSAIDs            | 26.6 | 16.9 | 3.9  | none                                        |
| 3507 | 2.4 | FEMALE | 34 | NSAIDs            |      | 0.5  | 0.5  | none                                        |
| 3179 | 2.6 | FEMALE | 46 | DMARDs            | 30.4 | 25.9 | 2.9  | none                                        |
| 574  | 2.7 | FEMALE | 68 | NSAIDs + DMARDs   | 21.2 | 27.6 | 9.6  | none                                        |
| 3412 | 2.8 | FEMALE | 44 | none              | 31.6 | 30.8 | 10.8 | none                                        |
| 3152 | 3.2 | FEMALE | 51 | none              |      | 13.7 | 0.7  | none                                        |
| 3311 | 3.2 | FEMALE | 39 | NSAIDs            | 28.7 | 6.5  | 5.5  | Depression                                  |
| 356  | 3.3 | MALE   | 65 | DMARDs            | 23.4 | 27.9 | 25.9 | Hypertension                                |
| 3661 | 3.3 | MALE   | 64 | NSAIDs + DMARDs   | 25.8 | 22.3 | 22.3 | none                                        |
| 3315 | 3.5 | MALE   | 23 | NSAIDs + DMARDs   | 42.6 | 8.7  | 0.7  | none                                        |
| 683  | 3.6 | MALE   | 60 | NSAIDs            | 28.1 | 31.8 | 12.8 | Hypertension + Hyperlipidemia               |
| 3665 | 3.9 | MALE   | 57 | NSAIDs            | 33.1 | 12.4 | 4.4  | none                                        |
| 379  | 4   | FEMALE | 56 | NSAIDs            | 33.2 | 30.4 | 20.4 | none                                        |
| 3161 | 4   | MALE   | 32 | NSAIDs            |      | 11.0 | 3.0  | none                                        |
| 321  | 4.1 | FEMALE | 49 | NSAIDs            | 24.3 | 38.7 | 23.7 | none                                        |
| 3320 | 4.2 | FEMALE | 35 | NSAIDs + DMARDs   | 23.4 | 14.4 | 11.4 | none                                        |

|      |     |        |    |                 |      |      |      |                                             |
|------|-----|--------|----|-----------------|------|------|------|---------------------------------------------|
| 501  | 4.6 | MALE   | 42 | none            | 31.2 | 15.4 | 11.4 | Hypertension + Diabetes +<br>Hyperlipidemia |
| 459  | 4.8 | FEMALE | 45 | NSAIDs + DMARDs | 33.3 | 20.4 | 15.4 | none                                        |
| 3111 | 4.8 | MALE   | 33 | NSAIDs          | 24.2 | 22.7 | 0.7  | none                                        |

**NSAID**- non steroidal anti-inflammatory drugs, **DMARD**- disease modifying anti-rheumatic drugs.

Table S13: Demographics information for moderate PASI classified patients

| ID   | PASI | Sex    | Age<br>(yrs) | Treatment History | BMI  | Duration<br>of<br>psoriasis<br>(years) | Duration<br>of PsA<br>(years) | Comorbidities             |
|------|------|--------|--------------|-------------------|------|----------------------------------------|-------------------------------|---------------------------|
| 391  | 5    | MALE   | 60           | none              | 24.3 | 36.7                                   | 34.7                          | none                      |
| 700  | 5.1  | MALE   | 55           | NSAIDs            | 25.9 | 50.1                                   | 23.1                          | Diabetes + Hyperlipidemia |
| 3380 | 5.1  | MALE   | 39           | DMARDs            | 22.9 | 12.5                                   | 2.5                           | Depression                |
| 3659 | 5.1  | FEMALE | 42           | NSAIDs            | 18.2 | 16.0                                   | 2.0                           | none                      |
| 663  | 5.2  | MALE   | 54           | none              | 28.0 | 39.0                                   | 17.0                          | none                      |
| 3321 | 5.2  | MALE   | 49           | NSAIDs            | 29.0 | 21.2                                   | 1.2                           | Depression                |
| 3313 | 5.2  | MALE   | 58           | DMARDs            |      | 33.9                                   | 26.9                          | none                      |
| 3540 | 5.3  | FEMALE | 72           | NSAIDs + DMARDs   | 24.2 | 44.6                                   | 1.6                           | none                      |
| 3484 | 5.3  | MALE   | 41           | none              | 32.9 | 33.6                                   | 0.6                           | none                      |
| 3462 | 5.4  | MALE   | 53           | NSAIDs + DMARDs   |      | 32.8                                   | 10.8                          | Hyperlipidemia            |
| 3482 | 5.4  | FEMALE | 54           | DMARDs            | 33.2 | 33.8                                   | 0.8                           | Hyperlipidemia            |
| 332  | 5.4  | MALE   | 58           | NSAIDs            | 29.9 | 29.9                                   | 28.9                          | none                      |
| 3385 | 5.5  | FEMALE | 45           | none              |      | 27.8                                   | 1.8                           | none                      |
| 619  | 5.7  | MALE   | 47           | NSAIDs            | 31.9 | 4.4                                    | 4.4                           | none                      |
| 1    | 5.7  | MALE   | 64           | NSAIDs            | 32.8 | 46.4                                   | 31.4                          | none                      |
| 486  | 5.7  | MALE   | 50           | NSAIDs + DMARDs   |      | 19.2                                   | 13.2                          | none                      |
| 3266 | 5.7  | FEMALE | 31           | none              | 21.8 | 29.5                                   | 3.5                           | none                      |
| 3447 | 5.7  | FEMALE | 38           | NSAIDs            | 38.1 | 22.5                                   | 0.5                           | none                      |
| 3683 | 5.7  | MALE   | 74           | NSAIDs + DMARDs   | 27.0 | 25.7                                   | 0.7                           | none                      |
| 550  | 5.8  | MALE   | 61           | DMARDs            | 24.9 | 19.4                                   | 21.4                          | none                      |
| 3050 | 6    | FEMALE | 30           | NSAIDs            | 19.8 | 6.0                                    | 6.0                           | none                      |
| 495  | 6    | MALE   | 47           | NSAIDs            | 22.7 | 15.2                                   | 20.2                          | Hyperlipidemia            |
| 638  | 6.2  | FEMALE | 60           | none              | 38.4 | 31.6                                   | 14.6                          | Depression                |
| 3495 | 6.2  | FEMALE | 44           | NSAIDs + DMARDs   | 29.2 | 28.7                                   | 15.7                          | none                      |
| 3425 | 6.2  | FEMALE | 36           | NSAIDs            | 35.6 | 18.7                                   | 10.7                          | Hyperlipidemia            |

|      |     |        |    |                   |      |      |      |                |
|------|-----|--------|----|-------------------|------|------|------|----------------|
| 360  | 6.3 | FEMALE | 50 | NSAIDs + DMARDs   | 23.5 | 20.2 | 19.2 | none           |
| 427  | 6.3 | MALE   | 44 | NSAIDs            | 23.9 | 21.1 | 22.1 | none           |
| 3360 | 6.4 | MALE   | 54 | NSAIDs            | 52.1 | 8.2  | 9.2  | none           |
| 3439 | 6.5 | MALE   | 34 | NSAIDs + DMARDs   | 19.8 | 12.1 | 3.1  | none           |
| 3365 | 6.6 | MALE   | 29 | NSAIDs + DMARDs   | 40.0 | 4.9  | 4.9  | none           |
| 643  | 6.9 | FEMALE | 47 | NSAIDs + DMARDs   | 27.1 | 25.6 | 6.6  | none           |
| 3361 | 7   | MALE   | 56 | NSAIDs            |      | 30.6 | 0.6  | none           |
| 688  | 7.4 | FEMALE | 47 | NSAIDs + DMARDs   | 32.4 | 26.6 | 16.6 | none           |
| 3185 | 7.4 | FEMALE | 60 | DMARDs            | 27.4 | 4.3  | 4.3  | none           |
| 3527 | 7.5 | FEMALE | 19 | none              | 24.6 | 3.3  | 3.3  | Depression     |
| 312  | 7.5 | MALE   | 45 | NSAIDs + DMARDs   | 27.1 | 23.1 | 22.1 | none           |
| 3434 | 7.5 | MALE   | 50 | NSAIDs            |      | 10.5 | 10.5 | none           |
| 3444 | 7.6 | FEMALE | 47 | NSAIDs            | 35.5 | 11.4 | 1.4  | Hyperlipidemia |
| 3734 | 7.8 | FEMALE | 56 | NSAIDs            | 25.3 | 31.2 | 0.2  | none           |
| 370  | 8   | MALE   | 39 | NSAIDs + DMARDs   | 30.1 | 19.7 | 19.7 | none           |
| 3080 | 8.1 | FEMALE | 62 | NSAIDs + DMARDs   |      | 37.5 | 4.5  | none           |
|      |     |        |    | NSAIDs + DMARDs + |      |      |      |                |
| 463  | 8.2 | FEMALE | 49 | Steroids          | 28.3 | 16.9 | 16.9 | none           |
| 692  | 8.4 | MALE   | 48 | none              | 27.1 | 9.8  | 5.8  | none           |
| 3436 | 8.6 | FEMALE | 33 | none              | 28.8 | 10.3 | 1.3  | none           |
| 587  | 8.9 | FEMALE | 45 | DMARDs            | 25.5 | 27.1 | 15.1 | none           |
| 422  | 9   | FEMALE | 54 | DMARDs            | 41.7 | 28.2 | 24.2 | none           |
| 642  | 9.2 | MALE   | 63 | NSAIDs            | 23.2 | 16.1 | 16.1 | Hypertension   |
| 533  | 9.2 | FEMALE | 40 | DMARDs            |      | 19.1 | 18.1 | Depression     |
| 3112 | 9.2 | FEMALE | 43 | none              | 28.6 | 24.7 | 24.7 | none           |
| 3274 | 9.2 | MALE   | 43 | none              | 27.8 | 28.9 | 13.9 | none           |
| 3324 | 9.4 | FEMALE | 42 | NSAIDs + DMARDs   |      | 16.4 | 0.4  | none           |
| 3554 | 9.8 | MALE   | 62 | NSAIDs + DMARDs   | 22.6 | 3.1  | 2.1  | none           |
| 310  |     | FEMALE | 67 | NSAIDs + DMARDs   | 38.8 | 36.8 | 24.8 | Hypertension   |
| 79   |     | FEMALE | 60 | none              | 22.1 | 42.1 | 37.1 | none           |

**NSAID**- non steroidal anti-inflammatory drugs, **DMARD**- disease modifying anti-rheumatic drugs.

Table S14: Demographics information for high PASI classified patients

| ID   | PASI | Sex    | Age<br>(yrs) | Treatment History | BMI  | Duration<br>of<br>psoriasis<br>(years) | Duration<br>of PsA<br>(years) | Comorbidities                 |
|------|------|--------|--------------|-------------------|------|----------------------------------------|-------------------------------|-------------------------------|
| 3287 | 10.1 | MALE   | 27           | NSAIDs + DMARDs   | 25.5 | 14.8                                   | 0.8                           | none                          |
| 3277 | 10.2 | FEMALE | 44           | DMARDs            | 27.4 | 36.5                                   | 22.5                          | none                          |
| 3593 | 10.5 | MALE   | 81           | none              |      | 16.2                                   | 3.2                           | Hypertension                  |
| 708  | 10.7 | MALE   | 49           | DMARDs            | 22.7 | 19.2                                   | 3.2                           | none                          |
| 3189 | 10.8 | MALE   | 46           | NSAIDs            | 27.1 | 6.8                                    | 0.8                           | none                          |
| 3487 | 11.1 | MALE   | 29           | none              | 25.6 | 19.6                                   | 13.6                          | none                          |
| 3264 | 12.2 | FEMALE | 33           | DMARDs + Steroids | 28.3 | 0.4                                    | 0.4                           | none                          |
| 3336 | 12.6 | MALE   | 39           | NSAIDs + DMARDs   | 34.1 | 25.4                                   | 0.4                           | none                          |
| 3247 | 12.9 | MALE   | 53           | none              | 33.4 | 36.2                                   | 6.2                           | Depression                    |
| 3374 | 13.3 | MALE   | 51           | NSAIDs + DMARDs   | 26.1 | 45.2                                   | 0.2                           | none                          |
| 3407 | 13.8 | FEMALE | 56           | NSAIDs + DMARDs   | 37.3 | 16.5                                   | 1.5                           | Diabetes + Hyperlipidemia     |
| 502  | 14   | MALE   | 40           | NSAIDs + DMARDs   | 28.1 | 14.5                                   | 13.5                          | none                          |
| 3303 | 14.7 | FEMALE | 27           | none              |      | 18.2                                   | 0.2                           | none                          |
| 416  | 15   | MALE   | 45           | NSAIDs            | 34.3 | 16.9                                   | 14.9                          | Hypertension                  |
| 714  | 16   | MALE   | 50           | none              | 33.0 | 12.1                                   | 2.1                           | none                          |
| 3057 | 16.2 | FEMALE | 53           | DMARDs            | 36.3 | 16.9                                   | 14.9                          | none                          |
| 153  | 16.2 | FEMALE | 72           | none              | 25.4 | 30.7                                   | 30.7                          | Diabetes                      |
| 681  | 16.5 | MALE   | 62           | none              | 31.0 | 35.7                                   | 32.7                          | Hypertension + Hyperlipidemia |
| 597  | 17.4 | MALE   | 65           | DMARDs            | 27.5 | 17.2                                   | 9.2                           | none                          |
| 3368 | 18   | MALE   | 47           | NSAIDs            | 18.8 | 8.8                                    | 1.8                           | none                          |
| 766  | 18.9 | FEMALE | 40           | none              | 40.1 | 15.8                                   | 10.8                          | none                          |

|      |      |        |    |                   |      |      |      |                           |
|------|------|--------|----|-------------------|------|------|------|---------------------------|
| 726  | 19.2 | FEMALE | 53 | DMARDs + Steroids | 30.1 | 36.2 | 32.2 | none                      |
| 3756 | 19.3 | MALE   | 23 | NSAIDs            | 21.3 | 6.3  | 0.3  | none                      |
| 206  | 19.5 | MALE   | 59 | DMARDs            | 30.6 | 37.3 | 37.3 | Hyperlipidemia            |
| 3823 | 20.8 | MALE   | 28 | NSAIDs + DMARDs   | 32.5 | 8.1  | 0.1  | Depression                |
| 3534 | 21.3 | MALE   | 43 | NSAIDs            | 25.9 | 14.3 | 14.3 | none                      |
| 742  | 22.4 | MALE   | 44 | NSAIDs            | 25.6 | 18.8 | 6.8  | none                      |
| 492  | 24.6 | FEMALE | 34 | NSAIDs + DMARDs   | 35.3 | 20.8 | 16.8 | none                      |
| 3261 | 26.2 | MALE   | 23 | NSAIDs            | 24.8 | 5.5  | 0.0  | none                      |
| 3225 | 27   | MALE   | 49 | NSAIDs            | 22.6 | 30.8 | 0.8  | none                      |
| 3245 | 28   | FEMALE | 57 | none              | 24.7 | 9.8  | 1.8  | Diabetes + Hyperlipidemia |
| 3316 | 28.2 | MALE   | 41 | none              |      | 34.8 | 9.8  | none                      |
| 3190 | 28.4 | MALE   | 56 | none              | 27.2 | 6.0  | 0.0  | none                      |
| 3705 | 33.3 | MALE   | 65 | none              | 20.3 | 22.6 | 19.6 | none                      |
| 3097 | 37.5 | MALE   | 39 | NSAIDs            | 33.7 | 22.0 | 17.0 | none                      |
| 3520 | 38.4 | MALE   | 54 | DMARDs + Steroids | 23.9 | 7.5  | 7.5  | none                      |
| 3486 | 38.7 | MALE   | 44 | DMARDs            | 32.9 | 14.2 | 1.2  | none                      |
| 3307 | 40.7 | MALE   | 50 | NSAIDs + DMARDs   | 32.2 | 10.1 | 4.1  | Hyperlipidemia            |
| 623  | 41.8 | FEMALE | 51 | NSAIDs + DMARDs   | 36.7 | 25.7 | 30.7 | none                      |
| 3194 | 54.6 | FEMALE | 57 | none              | 19.1 | 5.6  | 5.6  | none                      |

**Dur. PS:** duration of psoriasis (in years). **Dur. PsA:** duration of psoriatic arthritis (in years). **NSAID-** non steroidal anti-inflammatory drugs, **DMARD-** disease modifying anti-rheumatic drugs.
